# Supplementary material for: Synthesis of 2-arylamino-3-cyanoquinolines via a cascade reaction through a nitrilium intermediate
Source: Royal Society of Chemistry journal article supplement (doi:10.1039/c9ob02427a), 2020-01-01

# Synthesis of 2-Arylamino-3-Cyanoquinolines *via* A Cascade Reaction Through Nitrilium Intermediate

Mani Ramanathan, Jing Wan, Yi-Hung Liu, Shie-Ming Peng and Shiuh-Tzung Liu\*

Department of Chemistry, National Taiwan University, Taipei 106, Taiwan

## Supplementary

|                                                                     |        |
|---------------------------------------------------------------------|--------|
| Table S1. Crystal data and experimental details for <b>3i</b> ----- | S1     |
| Table S2. Atomic coordinates for <b>3i</b> -----                    | S2     |
| Table S3. Bond lengths [Å] and angles [°] for <b>3i</b> -----       | S3     |
| Table S4. Anisotropic displacement parameters for <b>3i</b> -----   | S5     |
| Copies of <sup>1</sup> H NMR and <sup>13</sup> C NMR Spectra-----   | S6-S59 |

Table S1. Crystal data and experimental details for **3i** (ic19402). **CCDC 1954817**

| Crystal data                      |                                                                                                            |
|-----------------------------------|------------------------------------------------------------------------------------------------------------|
| Empirical formula                 | C <sub>25</sub> H <sub>21</sub> N <sub>3</sub>                                                             |
| Formula weight                    | 363.45                                                                                                     |
| Crystal system                    | Monoclinic                                                                                                 |
| Space group                       | P2 <sub>1</sub> /c                                                                                         |
| Unit cell dimensions              | a = 11.6501(4) Å      α = 90°.<br>b = 10.8130(3) Å      β = 106.886(4)°.<br>c = 16.4196(5) Å      γ = 90°. |
| Volume                            | 1979.24(11) Å <sup>3</sup>                                                                                 |
| Z                                 | 4                                                                                                          |
| F(000)                            | 768                                                                                                        |
| Density (calculated)              | 1.220 Mg/m <sup>3</sup>                                                                                    |
| Wavelength                        | 0.71073 Å                                                                                                  |
| Cell parameters reflections used  | 4543                                                                                                       |
| Theta range for Cell parameters   | 3.8210 to 29.0090°.                                                                                        |
| Absorption coefficient            | 0.073 mm <sup>-1</sup>                                                                                     |
| Temperature                       | 150(2) K                                                                                                   |
| Crystal size                      | 0.25 x 0.20 x 0.15 mm <sup>3</sup>                                                                         |
| Data collection                   |                                                                                                            |
| Diffractometer                    | Xcalibur, Atlas, Gemini                                                                                    |
| Absorption correction             | Semi-empirical from equivalents                                                                            |
| Max. and min. transmission        | 1.00000 and 0.89892                                                                                        |
| No. of measured reflections       | 10903                                                                                                      |
| No. of independent reflections    | 4442 [R(int) = 0.0284]                                                                                     |
| No. of observed [I > 2σ(I)]       | 3276                                                                                                       |
| Completeness to theta = 25.242°   | 99.8 %                                                                                                     |
| Theta range for data collection   | 3.154 to 27.499°.                                                                                          |
| Refinement                        |                                                                                                            |
| Final R indices [I > 2σ(I)]       | R1 = 0.0599, wR2 = 0.1657                                                                                  |
| R indices (all data)              | R1 = 0.0825, wR2 = 0.1887                                                                                  |
| Goodness-of-fit on F <sup>2</sup> | 1.003                                                                                                      |
| No. of reflections                | 4442                                                                                                       |
| No. of parameters                 | 257                                                                                                        |
| No. of restraints                 | 0                                                                                                          |
| Largest diff. peak and hole       | 0.492 and -0.449 e.Å <sup>-3</sup>                                                                         |

Table S2. Atomic coordinates ( $\times 10^4$ ) and equivalent isotropic displacement parameters ( $\text{\AA}^2 \times 10^3$ ) for **3i** (ic19402).  $U(\text{eq})$  is defined as one third of the trace of the orthogonalized  $U^{ij}$  tensor.

|       | x        | y       | z       | $U(\text{eq})$ |
|-------|----------|---------|---------|----------------|
| N(1)  | 7941(2)  | 4179(2) | 3512(1) | 26(1)          |
| N(2)  | 6675(2)  | 5462(2) | 3974(1) | 28(1)          |
| N(3)  | 5184(2)  | 3649(2) | 5135(1) | 38(1)          |
| C(1)  | 8541(2)  | 3080(2) | 3568(1) | 25(1)          |
| C(2)  | 9407(2)  | 2971(2) | 3121(1) | 33(1)          |
| C(3)  | 10114(2) | 1934(2) | 3214(2) | 37(1)          |
| C(4)  | 9972(2)  | 958(2)  | 3739(1) | 35(1)          |
| C(5)  | 9104(2)  | 1006(2) | 4145(1) | 29(1)          |
| C(6)  | 8363(2)  | 2066(2) | 4068(1) | 24(1)          |
| C(7)  | 7471(2)  | 2199(2) | 4504(1) | 23(1)          |
| C(8)  | 6899(2)  | 3325(2) | 4456(1) | 24(1)          |
| C(9)  | 7190(2)  | 4332(2) | 3967(1) | 24(1)          |
| C(10) | 7163(2)  | 1154(2) | 4991(1) | 26(1)          |
| C(11) | 6765(2)  | 39(2)   | 4582(1) | 33(1)          |
| C(12) | 6459(2)  | -932(2) | 5027(2) | 44(1)          |
| C(13) | 6559(2)  | -806(2) | 5880(2) | 47(1)          |
| C(14) | 6969(2)  | 291(2)  | 6298(2) | 44(1)          |
| C(15) | 7268(2)  | 1273(2) | 5854(1) | 33(1)          |
| C(16) | 5954(2)  | 3492(2) | 4847(1) | 27(1)          |
| C(17) | 6914(2)  | 6511(2) | 3514(1) | 25(1)          |
| C(18) | 8067(2)  | 7009(2) | 3704(1) | 29(1)          |
| C(19) | 8263(2)  | 7987(2) | 3210(1) | 31(1)          |
| C(20) | 7352(2)  | 8506(2) | 2558(1) | 30(1)          |
| C(21) | 6202(2)  | 8046(2) | 2428(1) | 29(1)          |
| C(22) | 5960(2)  | 7045(2) | 2888(1) | 27(1)          |
| C(23) | 9092(2)  | 6530(2) | 4428(2) | 44(1)          |
| C(24) | 7598(2)  | 9526(2) | 2001(2) | 44(1)          |
| C(25) | 4701(2)  | 6553(2) | 2701(2) | 40(1)          |

Table S3. Bond lengths [ $\text{\AA}$ ] and angles [ $^\circ$ ] for **3i** ic19402.

|                 |            |                   |            |
|-----------------|------------|-------------------|------------|
| N(1)-C(9)       | 1.315(2)   | C(10)-C(15)       | 1.392(3)   |
| N(1)-C(1)       | 1.368(3)   | C(10)-C(11)       | 1.393(3)   |
| N(2)-C(9)       | 1.362(3)   | C(11)-C(12)       | 1.383(3)   |
| N(2)-C(17)      | 1.433(3)   | C(12)-C(13)       | 1.379(4)   |
| N(3)-C(16)      | 1.142(3)   | C(13)-C(14)       | 1.384(4)   |
| C(1)-C(2)       | 1.415(3)   | C(14)-C(15)       | 1.389(3)   |
| C(1)-C(6)       | 1.419(3)   | C(17)-C(18)       | 1.396(3)   |
| C(2)-C(3)       | 1.373(3)   | C(17)-C(22)       | 1.401(3)   |
| C(3)-C(4)       | 1.402(3)   | C(18)-C(19)       | 1.391(3)   |
| C(4)-C(5)       | 1.365(3)   | C(18)-C(23)       | 1.511(3)   |
| C(5)-C(6)       | 1.419(3)   | C(19)-C(20)       | 1.388(3)   |
| C(6)-C(7)       | 1.431(3)   | C(20)-C(21)       | 1.387(3)   |
| C(7)-C(8)       | 1.380(3)   | C(20)-C(24)       | 1.514(3)   |
| C(7)-C(10)      | 1.487(3)   | C(21)-C(22)       | 1.395(3)   |
| C(8)-C(16)      | 1.438(3)   | C(22)-C(25)       | 1.506(3)   |
| C(8)-C(9)       | 1.451(3)   |                   |            |
| C(9)-N(1)-C(1)  | 118.85(16) | C(7)-C(8)-C(9)    | 120.49(17) |
| C(9)-N(2)-C(17) | 123.47(17) | C(16)-C(8)-C(9)   | 119.06(17) |
| N(1)-C(1)-C(2)  | 117.68(17) | N(1)-C(9)-N(2)    | 119.05(17) |
| N(1)-C(1)-C(6)  | 123.53(17) | N(1)-C(9)-C(8)    | 121.38(17) |
| C(2)-C(1)-C(6)  | 118.76(18) | N(2)-C(9)-C(8)    | 119.57(17) |
| C(3)-C(2)-C(1)  | 120.36(19) | C(15)-C(10)-C(11) | 119.32(18) |
| C(2)-C(3)-C(4)  | 120.6(2)   | C(15)-C(10)-C(7)  | 120.92(18) |
| C(5)-C(4)-C(3)  | 120.51(19) | C(11)-C(10)-C(7)  | 119.77(17) |
| C(4)-C(5)-C(6)  | 120.33(19) | C(12)-C(11)-C(10) | 120.2(2)   |
| C(5)-C(6)-C(1)  | 119.26(18) | C(13)-C(12)-C(11) | 120.2(2)   |
| C(5)-C(6)-C(7)  | 123.20(17) | C(12)-C(13)-C(14) | 120.2(2)   |
| C(1)-C(6)-C(7)  | 117.46(17) | C(13)-C(14)-C(15) | 119.9(2)   |
| C(8)-C(7)-C(6)  | 117.95(17) | C(14)-C(15)-C(10) | 120.1(2)   |
| C(8)-C(7)-C(10) | 120.87(17) | N(3)-C(16)-C(8)   | 177.7(2)   |
| C(6)-C(7)-C(10) | 121.18(17) | C(18)-C(17)-C(22) | 120.75(18) |
| C(7)-C(8)-C(16) | 120.34(17) | C(18)-C(17)-N(2)  | 120.62(17) |

|                   |            |                   |            |
|-------------------|------------|-------------------|------------|
| C(22)-C(17)-N(2)  | 118.61(18) | C(21)-C(20)-C(24) | 120.8(2)   |
| C(19)-C(18)-C(17) | 118.28(18) | C(19)-C(20)-C(24) | 121.6(2)   |
| C(19)-C(18)-C(23) | 119.53(19) | C(20)-C(21)-C(22) | 122.18(19) |
| C(17)-C(18)-C(23) | 122.19(19) | C(21)-C(22)-C(17) | 118.43(19) |
| C(20)-C(19)-C(18) | 122.57(19) | C(21)-C(22)-C(25) | 120.11(18) |
| C(21)-C(20)-C(19) | 117.54(19) | C(17)-C(22)-C(25) | 121.46(18) |

---

Symmetry transformations used to generate equivalent atoms:

Table S4. Anisotropic displacement parameters ( $\text{\AA}^2 \times 10^3$ ) for **3i** (ic19402). The anisotropic displacement factor exponent takes the form:  $-2\pi^2 [ h^2 a^{*2} U^{11} + \dots + 2 h k a^* b^* U^{12} ]$

|       | $U^{11}$ | $U^{22}$ | $U^{33}$ | $U^{23}$ | $U^{13}$ | $U^{12}$ |
|-------|----------|----------|----------|----------|----------|----------|
| N(1)  | 27(1)    | 26(1)    | 28(1)    | 4(1)     | 12(1)    | 2(1)     |
| N(2)  | 32(1)    | 26(1)    | 30(1)    | 5(1)     | 15(1)    | 4(1)     |
| N(3)  | 45(1)    | 29(1)    | 52(1)    | 4(1)     | 30(1)    | 5(1)     |
| C(1)  | 24(1)    | 27(1)    | 25(1)    | 0(1)     | 7(1)     | 0(1)     |
| C(2)  | 34(1)    | 32(1)    | 38(1)    | 6(1)     | 19(1)    | 2(1)     |
| C(3)  | 32(1)    | 39(1)    | 46(1)    | 2(1)     | 22(1)    | 3(1)     |
| C(4)  | 32(1)    | 30(1)    | 45(1)    | 2(1)     | 16(1)    | 7(1)     |
| C(5)  | 29(1)    | 27(1)    | 32(1)    | 3(1)     | 11(1)    | 2(1)     |
| C(6)  | 24(1)    | 25(1)    | 24(1)    | 1(1)     | 7(1)     | 0(1)     |
| C(7)  | 23(1)    | 25(1)    | 21(1)    | -1(1)    | 6(1)     | -2(1)    |
| C(8)  | 25(1)    | 26(1)    | 22(1)    | 0(1)     | 9(1)     | 0(1)     |
| C(9)  | 22(1)    | 25(1)    | 22(1)    | 1(1)     | 4(1)     | 0(1)     |
| C(10) | 27(1)    | 26(1)    | 27(1)    | 4(1)     | 11(1)    | 3(1)     |
| C(11) | 40(1)    | 30(1)    | 33(1)    | -1(1)    | 16(1)    | -2(1)    |
| C(12) | 55(2)    | 28(1)    | 56(2)    | 2(1)     | 29(1)    | -4(1)    |
| C(13) | 57(2)    | 38(1)    | 57(2)    | 19(1)    | 32(1)    | 3(1)     |
| C(14) | 54(2)    | 50(1)    | 31(1)    | 13(1)    | 21(1)    | 9(1)     |
| C(15) | 37(1)    | 34(1)    | 29(1)    | 3(1)     | 12(1)    | 3(1)     |
| C(16) | 33(1)    | 21(1)    | 30(1)    | 2(1)     | 12(1)    | 0(1)     |
| C(17) | 30(1)    | 22(1)    | 26(1)    | -1(1)    | 11(1)    | 2(1)     |
| C(18) | 30(1)    | 25(1)    | 31(1)    | -3(1)    | 7(1)     | 3(1)     |
| C(19) | 29(1)    | 26(1)    | 40(1)    | -3(1)    | 12(1)    | -2(1)    |
| C(20) | 38(1)    | 22(1)    | 35(1)    | 0(1)     | 18(1)    | 3(1)     |
| C(21) | 34(1)    | 26(1)    | 28(1)    | 1(1)     | 8(1)     | 6(1)     |
| C(22) | 28(1)    | 26(1)    | 26(1)    | -2(1)    | 8(1)     | 1(1)     |
| C(23) | 36(1)    | 40(1)    | 47(1)    | 4(1)     | -5(1)    | -2(1)    |
| C(24) | 46(1)    | 38(1)    | 56(2)    | 16(1)    | 24(1)    | 4(1)     |
| C(25) | 30(1)    | 43(1)    | 43(1)    | 6(1)     | 4(1)     | -4(1)    |

PD, 2-ABP, Malononitrile, 80deg, 5h, purified pale yellow solid

7.875  
7.854  
7.696  
7.692  
7.678  
7.675  
7.671  
7.657  
7.654  
7.599  
7.593  
7.589  
7.585  
7.577  
7.572  
7.566  
7.564  
7.561  
7.496  
7.495  
7.493  
7.492  
7.486  
7.484  
7.480  
7.478  
7.476  
7.472  
7.471  
7.468  
7.462  
7.425  
7.420  
7.406  
7.404  
7.399  
7.390  
7.385  
7.277  
7.274  
7.260  
7.257  
7.253  
7.240  
7.236  
7.154  
7.151  
7.148  
7.133  
7.117  
7.114  
7.111

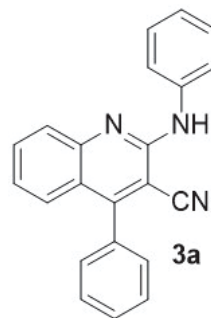

NAME mani 04-12-2018  
EXPNO 1  
PROCNO 1  
Date\_ 20181204  
Time 20.31 h  
INSTRUM spect  
PROBHD Z108618\_0411 (  
PULPROG zg30  
TD 32768  
SOLVENT CDCl3  
NS 30  
DS 0  
SWH 8802.817 Hz  
FIDRES 0.537281 Hz  
AQ 1.8612725 sec  
RG 133.5  
DW 56.800 usec  
DE 14.47 usec  
TE 297.4 K  
D1 1.00000000 sec  
TD0 1  
SFO1 400.1328009 MHz  
NUC1 1H  
P1 15.50 usec  
SI 131072  
SF 400.1300178 MHz  
WDW EM  
SSB 0  
LB 0.00 Hz  
GB 0  
PC 1.00

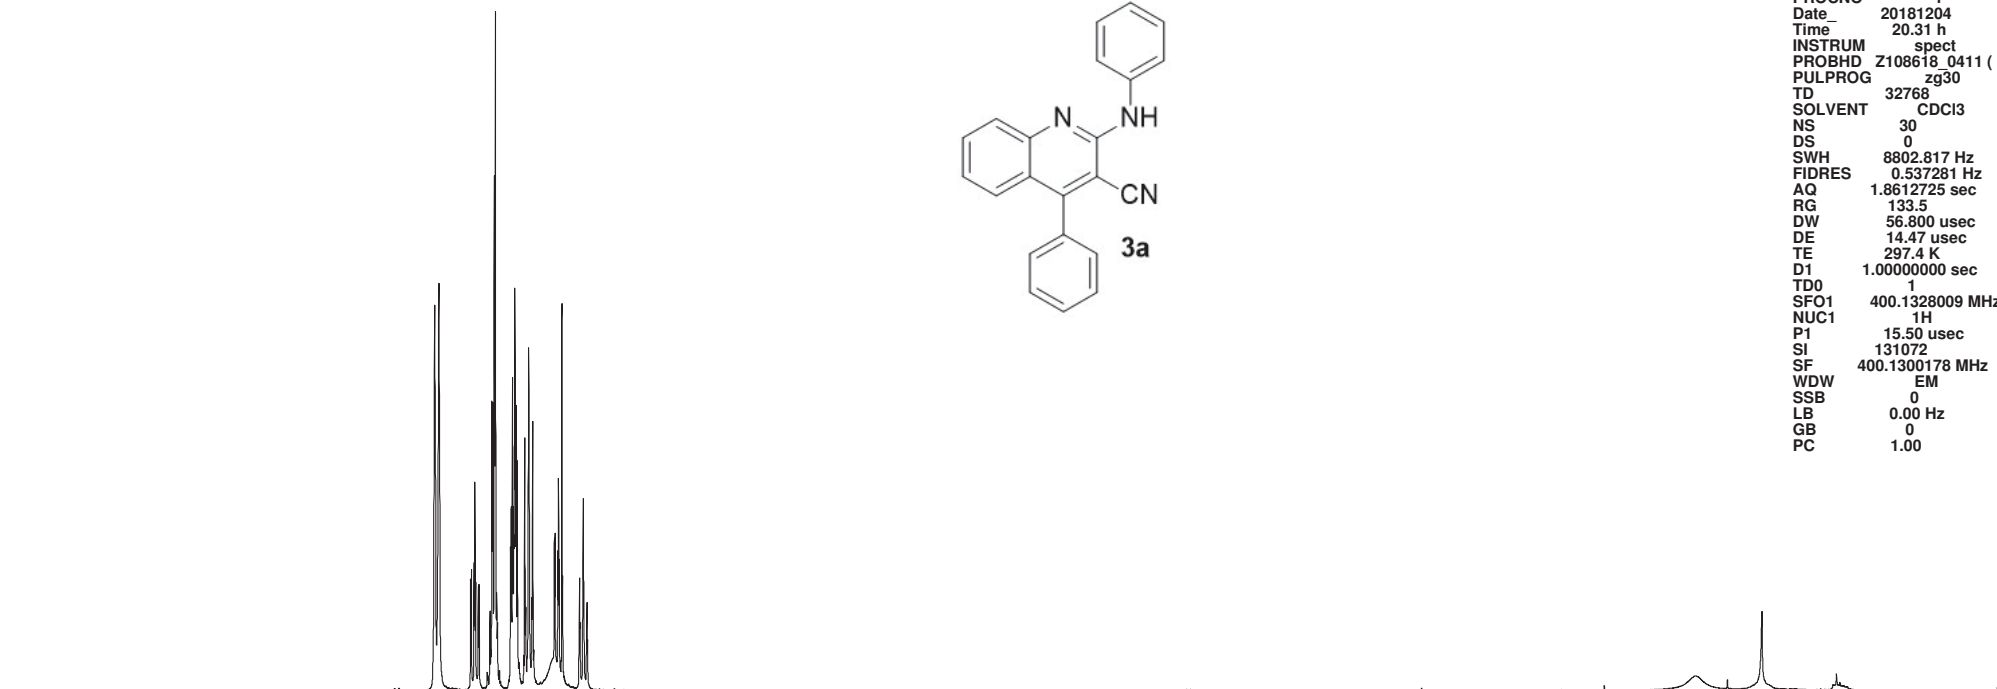

9.5 9.0 8.5 8.0 7.5 7.0 6.5 6.0 5.5 5.0 4.5 4.0 3.5 3.0 2.5 2.0 1.5 1.0 ppm

3.00  
1.09  
3.05  
3.04  
2.12  
2.06  
1.04

PD, 2-ABP, Malononitrile, 80deg, 5h, purified pale yellow solid

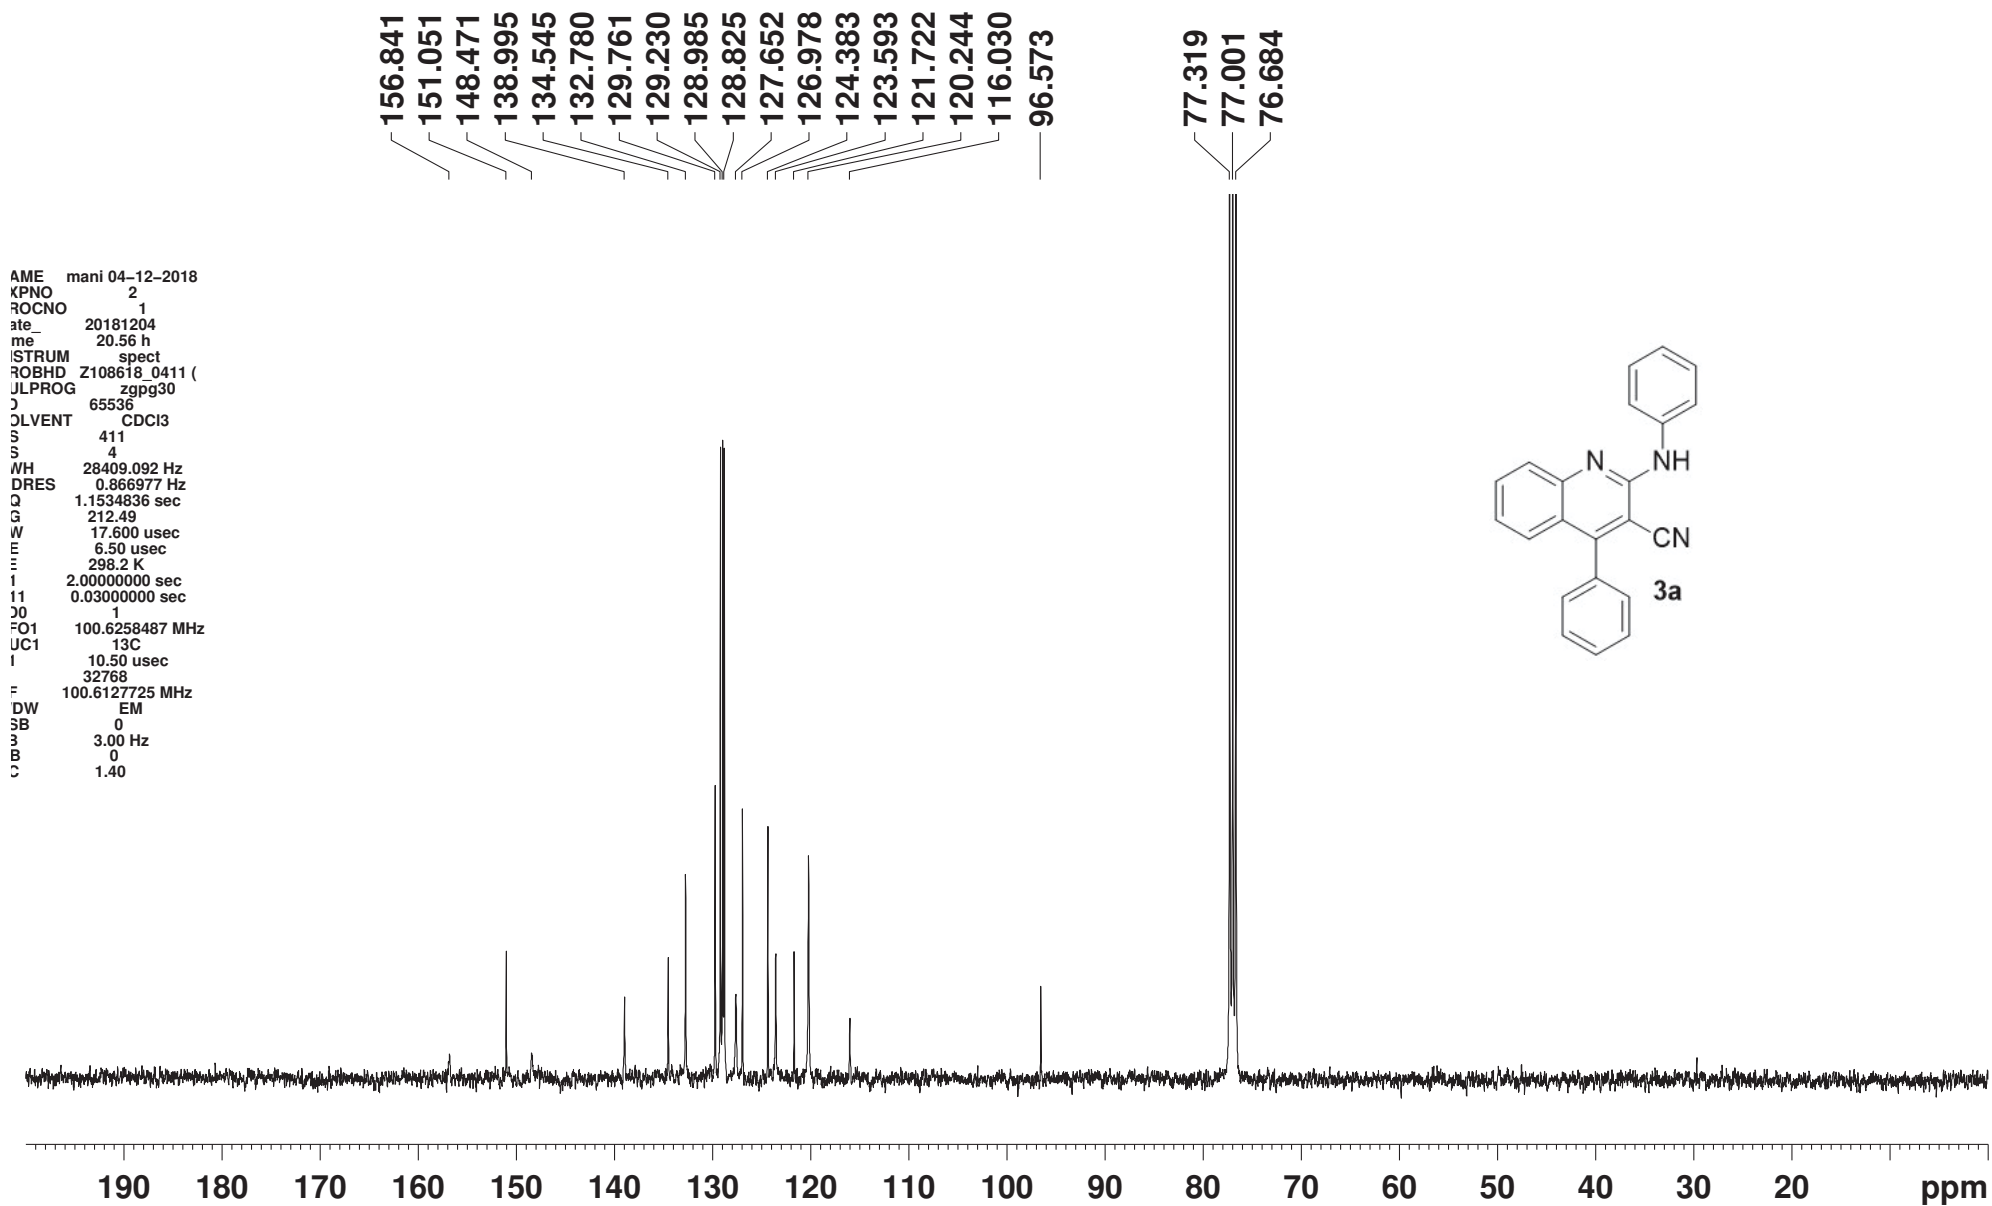



4MePD, 2-ABP, MCN, 80deg, 5h, purified pale yellow solid

7.842  
7.821  
7.728  
7.707  
7.674  
7.671  
7.657  
7.654  
7.650  
7.636  
7.633  
7.593  
7.589  
7.582  
7.579  
7.570  
7.565  
7.559  
7.477  
7.473  
7.469  
7.460  
7.455  
7.253  
7.251  
7.239  
7.233  
7.230  
7.216  
7.196

2.362

NAME mani 04-01-2  
EXPNO 1  
PROCNO 1  
Date\_ 20190104  
Time 15.27  
INSTRUM spect  
PROBHD 5 mm PABB  
PULPROG zg30  
TD 32768  
SOLVENT CDCl3  
NS 24  
DS 0  
SWH 8223.685 H  
FIDRES 0.250967 I  
AQ 1.9923444 se  
RG 161  
DW 60.800 use  
DE 6.50 usec  
TE 295.5 K  
D1 1.0000000 se  
TD0 1

===== CHANNEL f1  
NUC1 1H  
P1 14.50 usec  
PL1 0.00 dB  
PL1W 10.67551708  
SFO1 400.1528010  
SI 32768  
SF 400.1500168 M  
WDW EM  
SSB 0  
LB 0.30 Hz  
GB 0  
PC 1.00

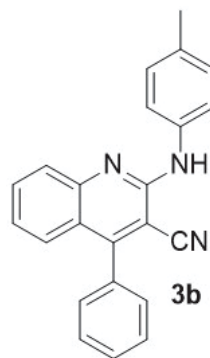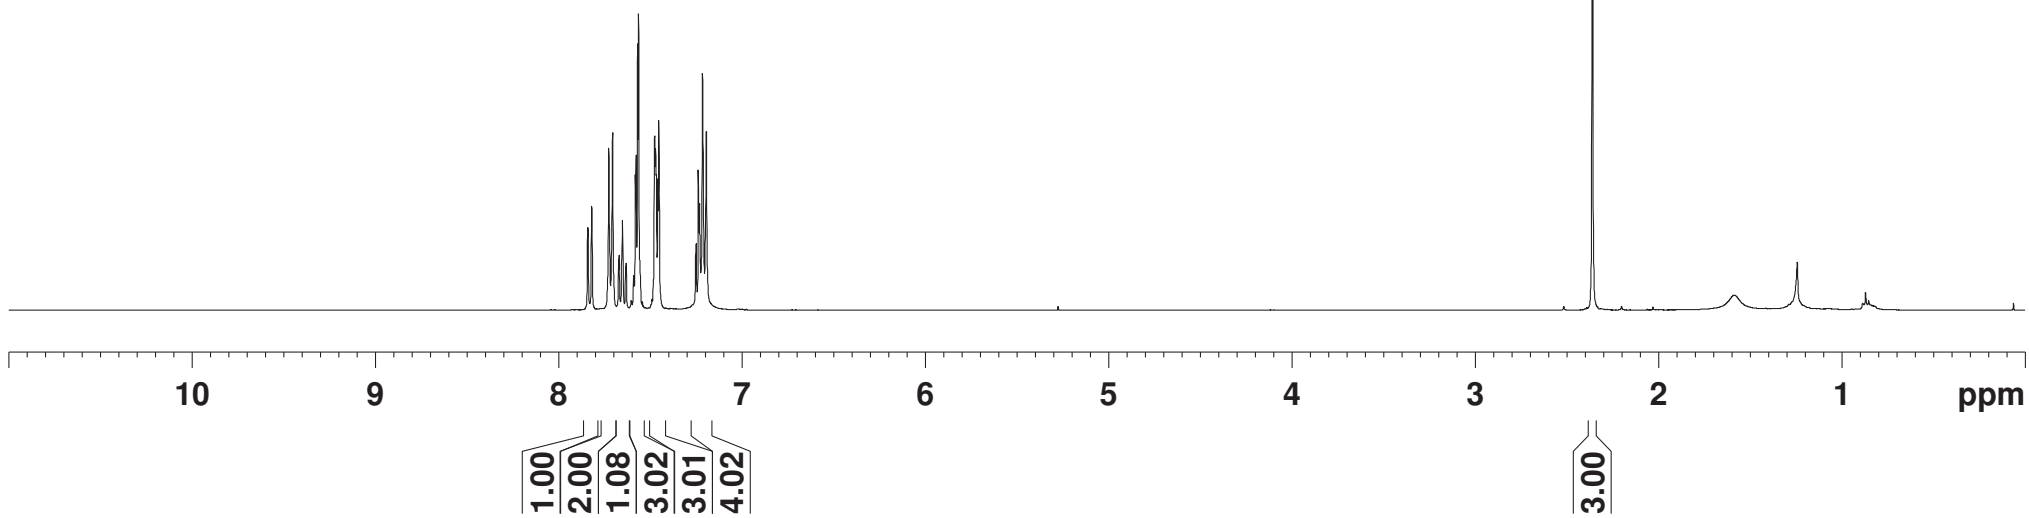

4MePD, 2-ABP, MCN, 80deg, 5h, purified pale yellow solid

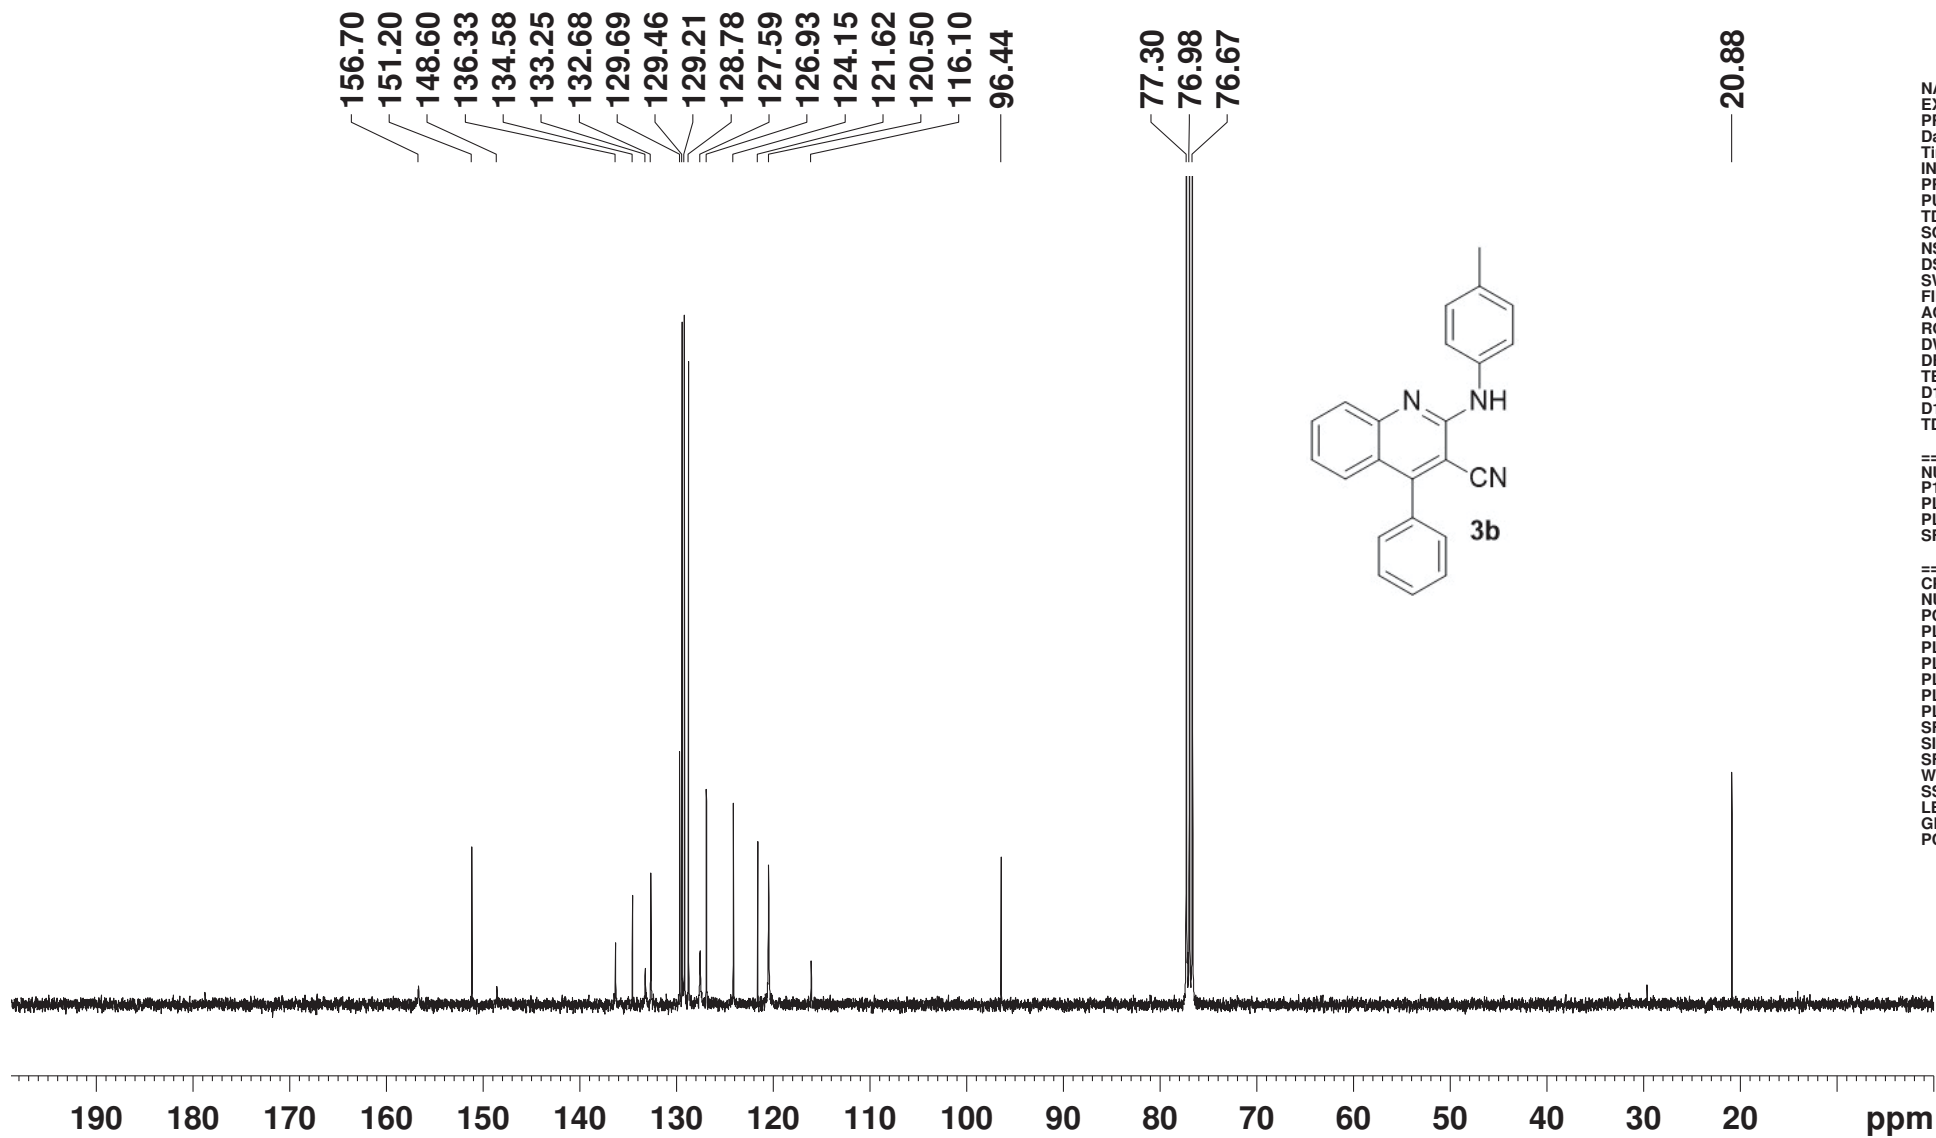

NAME mani  
EXPNO  
PROCNO  
Date\_ 20  
Time 1  
INSTRUM  
PROBHD 5 m  
PULPROG  
TD 65  
SOLVENT  
NS 1  
DS  
SWH 284  
FIDRES 0  
AQ 1.15  
RG  
DW 17  
DE 6  
TE 29  
D1 2.000  
D11 0.031  
TD0

=====  
NUC1 CH/  
P1 9.  
PL1  
PL1W 41.1  
SFO1 100.

=====  
CPDPRG2  
NUC2 CH/  
PCPD2  
PL2  
PL12 1  
PL13 1  
PL2W 13.4  
PL12W 0.3  
PL13W 0.1  
SFO2 400.  
SI 32.  
SF 100.6  
WDW  
SSB  
LB 1  
GB  
PC 1

3-MePD, MCN, 2-ABP, 80deg, 5h, purified pale yellow solid

7.690  
7.687  
7.673  
7.669  
7.666  
7.652  
7.648  
7.604  
7.586  
7.582  
7.574  
7.569  
7.563  
7.559  
7.498  
7.490  
7.486  
7.477  
7.475  
7.466  
7.461  
7.453  
7.312  
7.293  
7.273  
7.269  
7.266  
7.252  
7.248  
7.245  
7.239  
7.231  
7.228  
6.960  
6.941

2.404

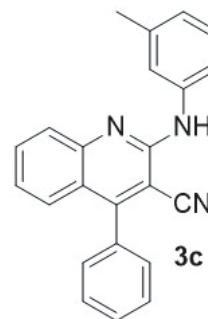

NAME mani 31-12-2018  
EXPNO 1  
PROCNO 1  
Date\_ 20181231  
Time 18.09 h  
INSTRUM spect  
PROBHD Z108618\_0411 (  
PULPROG zg30  
TD 32768  
SOLVENT CDCl3  
NS 30  
DS 0  
SWH 8802.817 Hz  
FIDRES 0.537281 Hz  
AQ 1.8612725 sec  
RG 118.08  
DW 56.800 usec  
DE 14.47 usec  
TE 296.7 K  
D1 1.00000000 sec  
TD0 1  
SFO1 400.1328009 MH:  
NUC1 1H  
P1 15.50 usec  
SI 131072  
SF 400.1300180 MHz  
WDW EM  
SSB 0  
LB 0.00 Hz  
GB 0  
PC 1.00

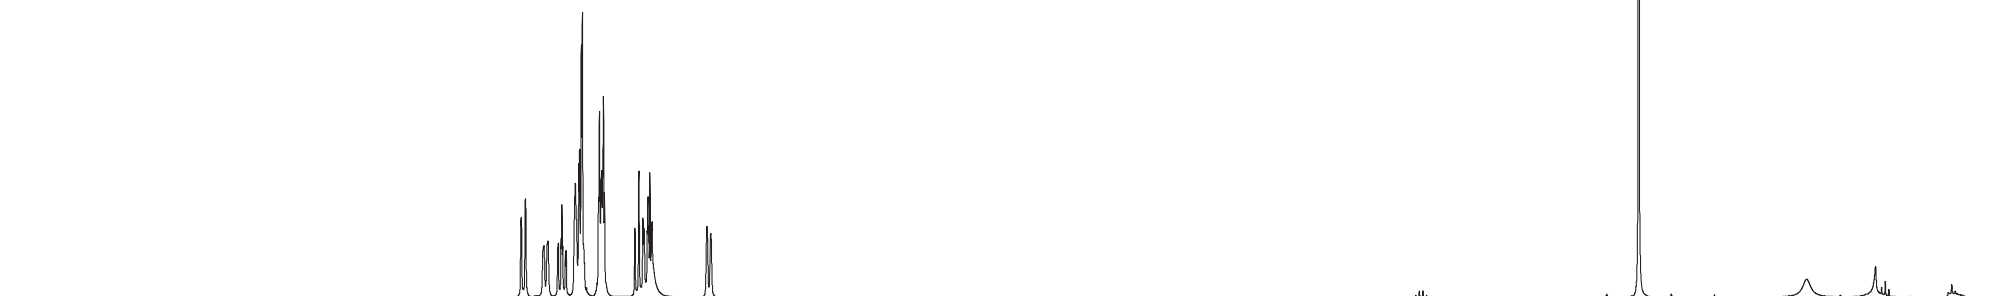

10.0 9.5 9.0 8.5 8.0 7.5 7.0 6.5 6.0 5.5 5.0 4.5 4.0 3.5 3.0 2.5 2.0 1.5 1.0

1.00  
1.04  
1.08  
4.01  
3.01  
1.09  
2.08  
1.01

3.01

3-MePD, MCN, 2-ABP, 80deg, 5h, purified pale yellow solid

156.728  
151.101  
148.571  
138.911  
138.799  
134.577  
132.702  
129.725  
129.233  
128.809  
127.692  
126.946  
124.414  
124.285  
121.674  
120.837  
117.368  
116.085  
96.576

77.320  
77.002  
76.684

21.611

NAME mani 31-12-2018  
EXPNO 2  
PROCNO 1  
Date\_ 20181231  
Time 18.30 h  
NSTRUM spect  
PROBHD Z108618\_0411 (  
PULPROG zgpg30  
ID 65536  
SOLVENT CDCl3  
NS 339  
DS 4  
SWH 28409.092 Hz  
FIDRES 0.866977 Hz  
AQ 1.1534836 sec  
RG 212.49  
JW 17.600 usec  
JE 6.50 usec  
TE 297.4 K  
D1 2.00000000 sec  
D11 0.03000000 sec  
TD0 1  
SFO1 100.6258487 MHz  
NUC1 13C  
P1 10.50 usec  
SI 32768  
SF 100.6127734 MHz  
WDW EM  
SSB 0  
LB 3.00 Hz  
GB 0  
PC 1.40

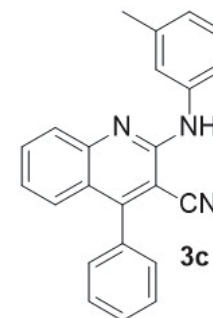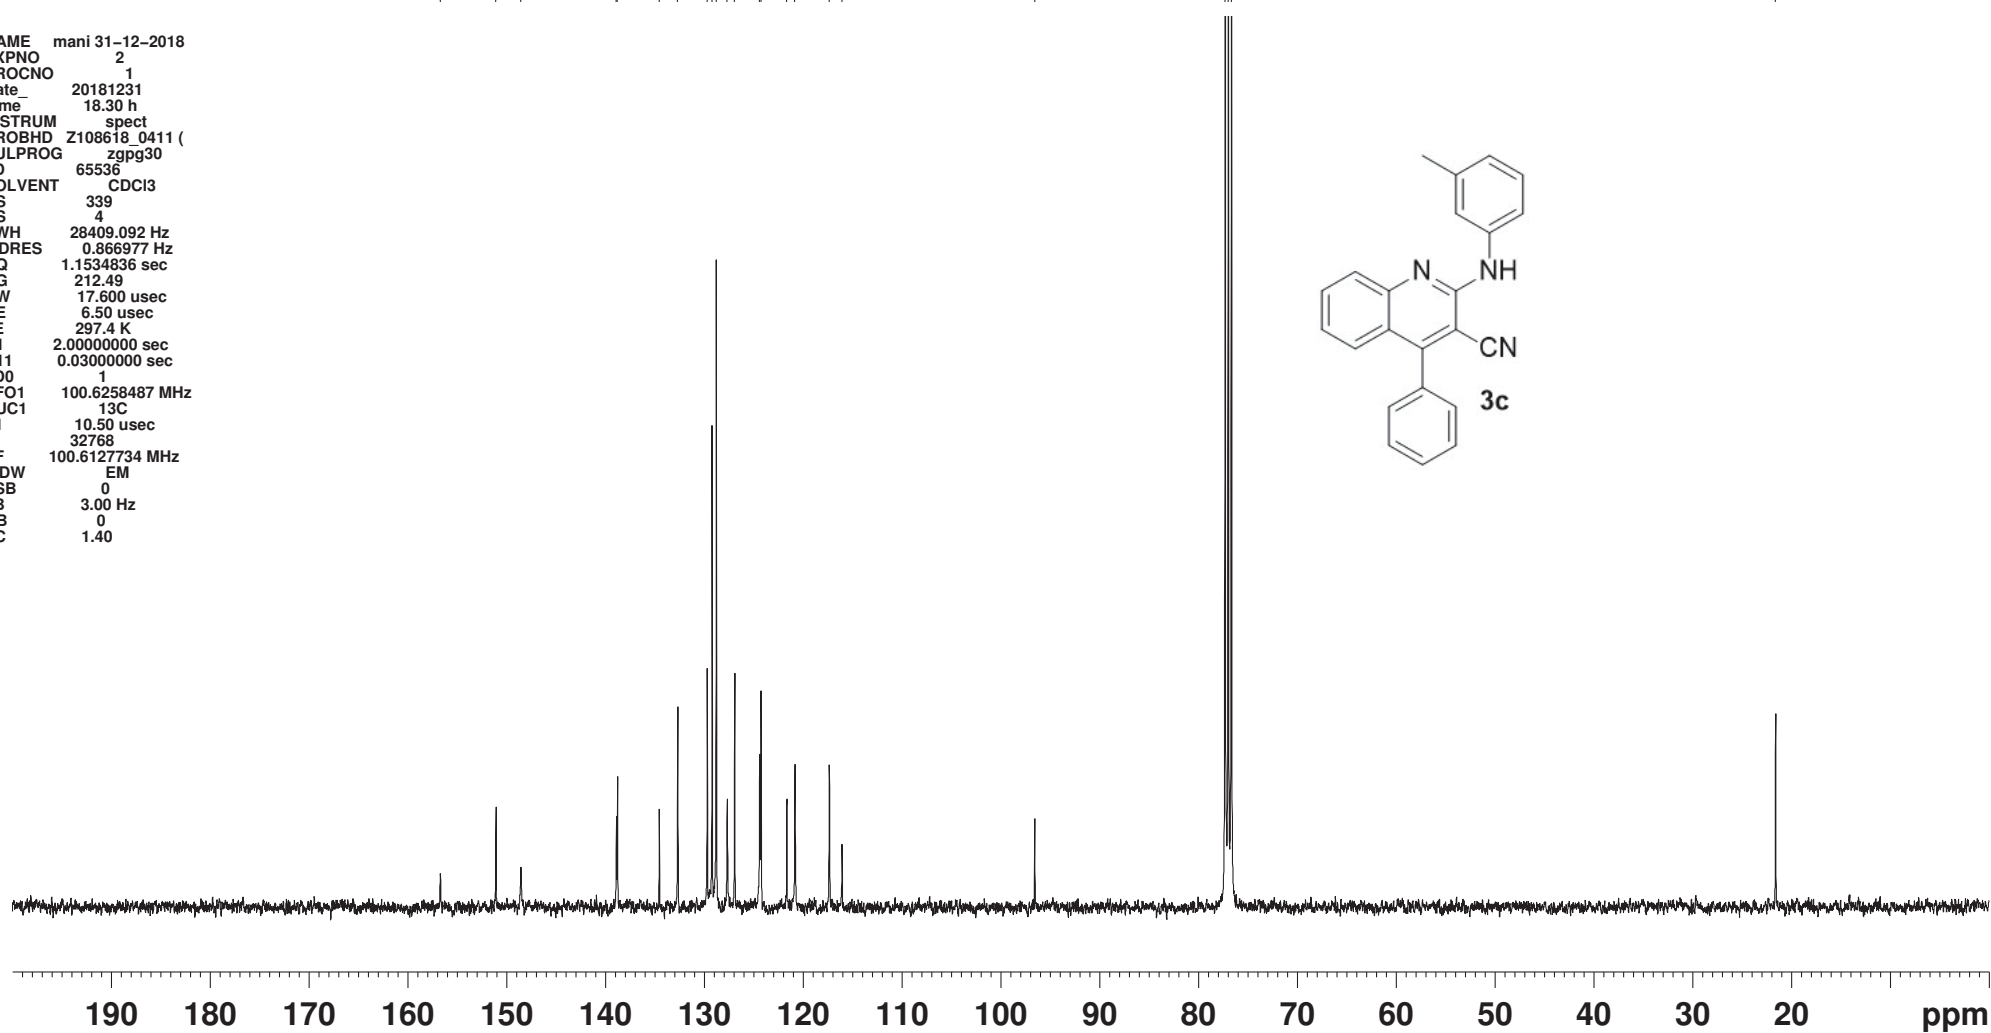

2MePD, 2-ABP, MCN, 80deg, 5h, purified pale yellow solid

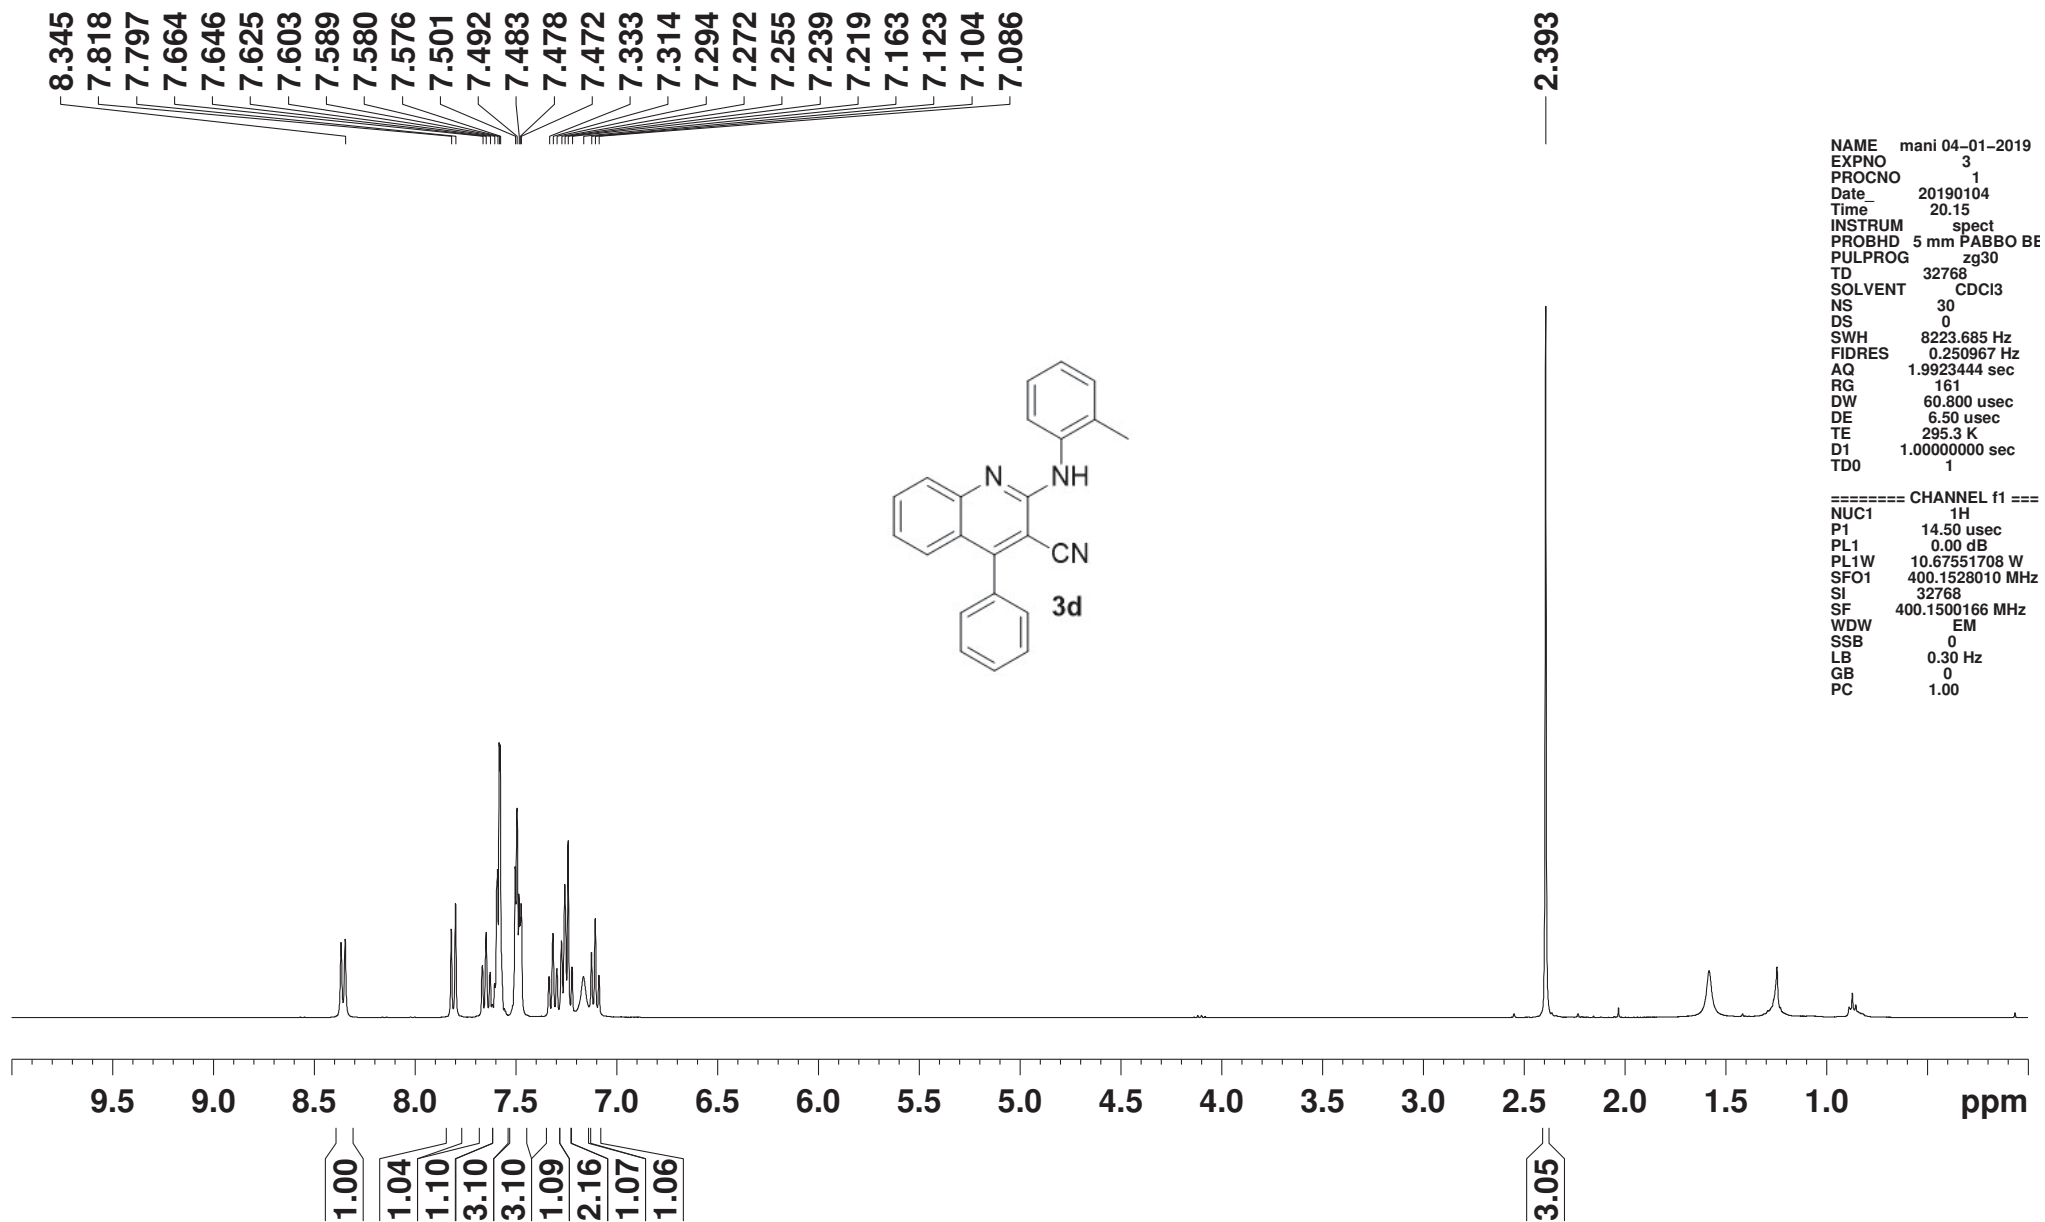

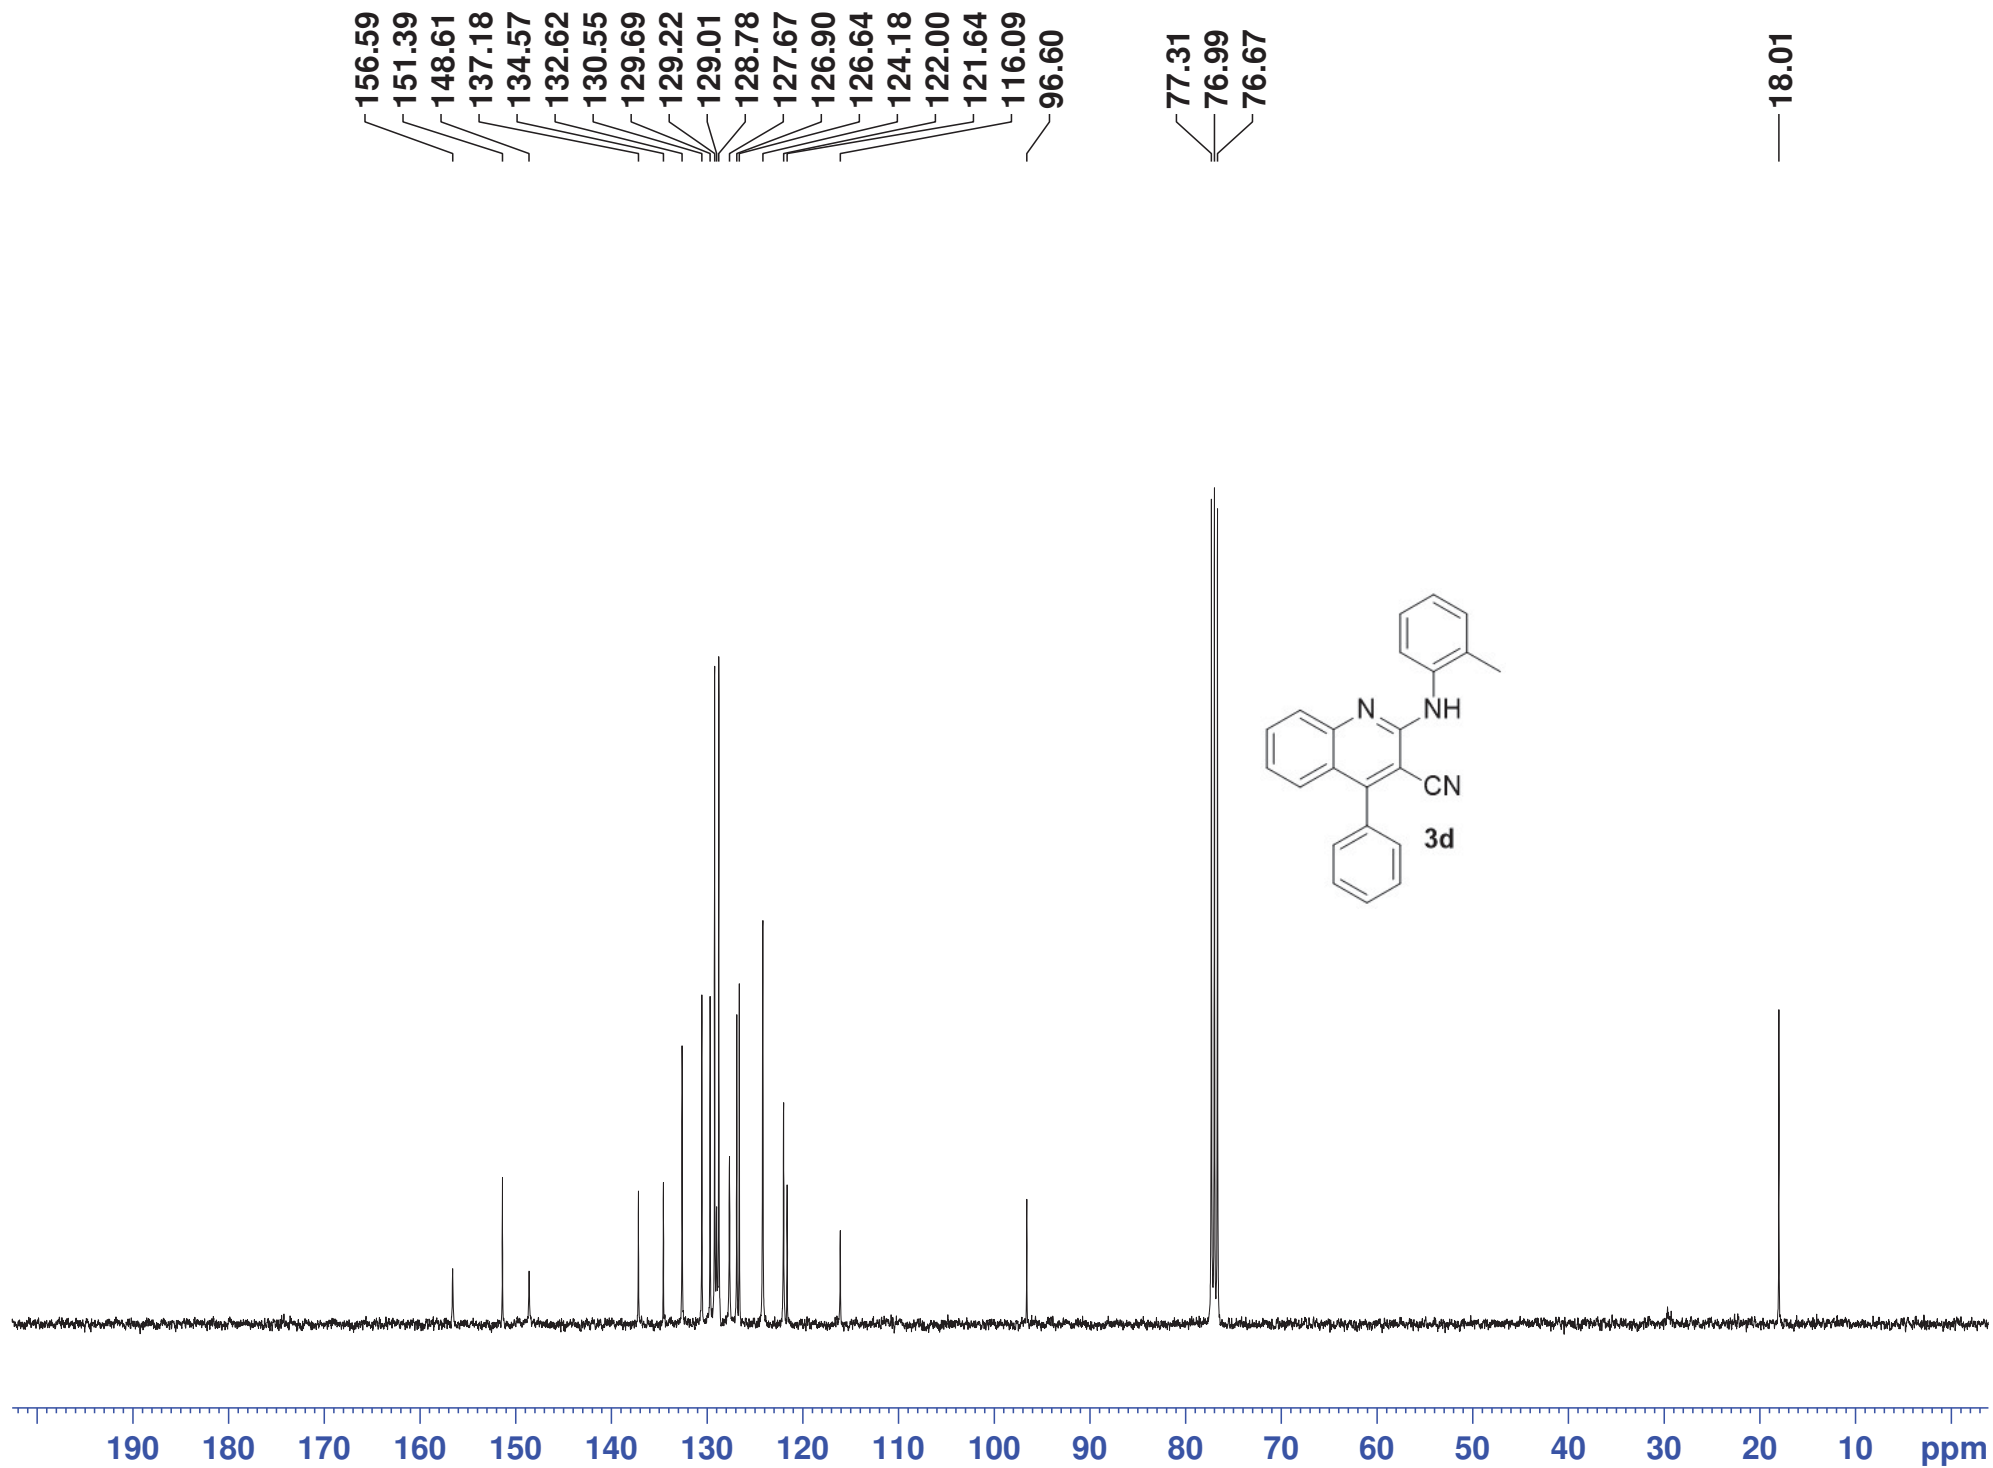

3OMePD, 2-ABP, MCN, 80deg, 5h, purified pale yellow solid

7.668  
7.654  
7.651  
7.595  
7.591  
7.585  
7.580  
7.572  
7.567  
7.561  
7.557  
7.493  
7.490  
7.486  
7.480  
7.472  
7.469  
7.461  
7.456  
7.305  
7.300  
7.292  
7.289  
7.285  
7.280  
7.275  
7.260  
7.257  
7.238  
6.695  
6.689  
6.680  
6.675  
6.673  
6.666  
3.870

NAME mani 08-01-2019  
EXPNO 2  
PROCNO 1  
Date\_ 20190108  
Time 19.58  
INSTRUM spect  
PROBHD 5 mm PABBO BB-  
PULPROG zg30  
TD 32768  
SOLVENT CDCl3  
NS 30  
DS 0  
SWH 8223.685 Hz  
FIDRES 0.250967 Hz  
AQ 1.9923444 sec  
RG 203  
DW 60.800 usec  
DE 6.50 usec  
TE 297.2 K  
D1 1.0000000 sec  
TD0 1

===== CHANNEL f1 =====  
NUC1 1H  
P1 14.50 usec  
PL1 0.00 dB  
PL1W 10.67551708 W  
SFO1 400.1528010 MHz  
SI 32768  
SF 400.1500172 MHz  
WDW EM  
SSB 0  
LB 0.30 Hz  
GB 0  
PC 1.00

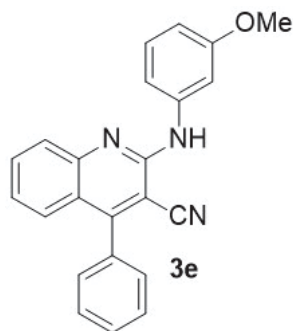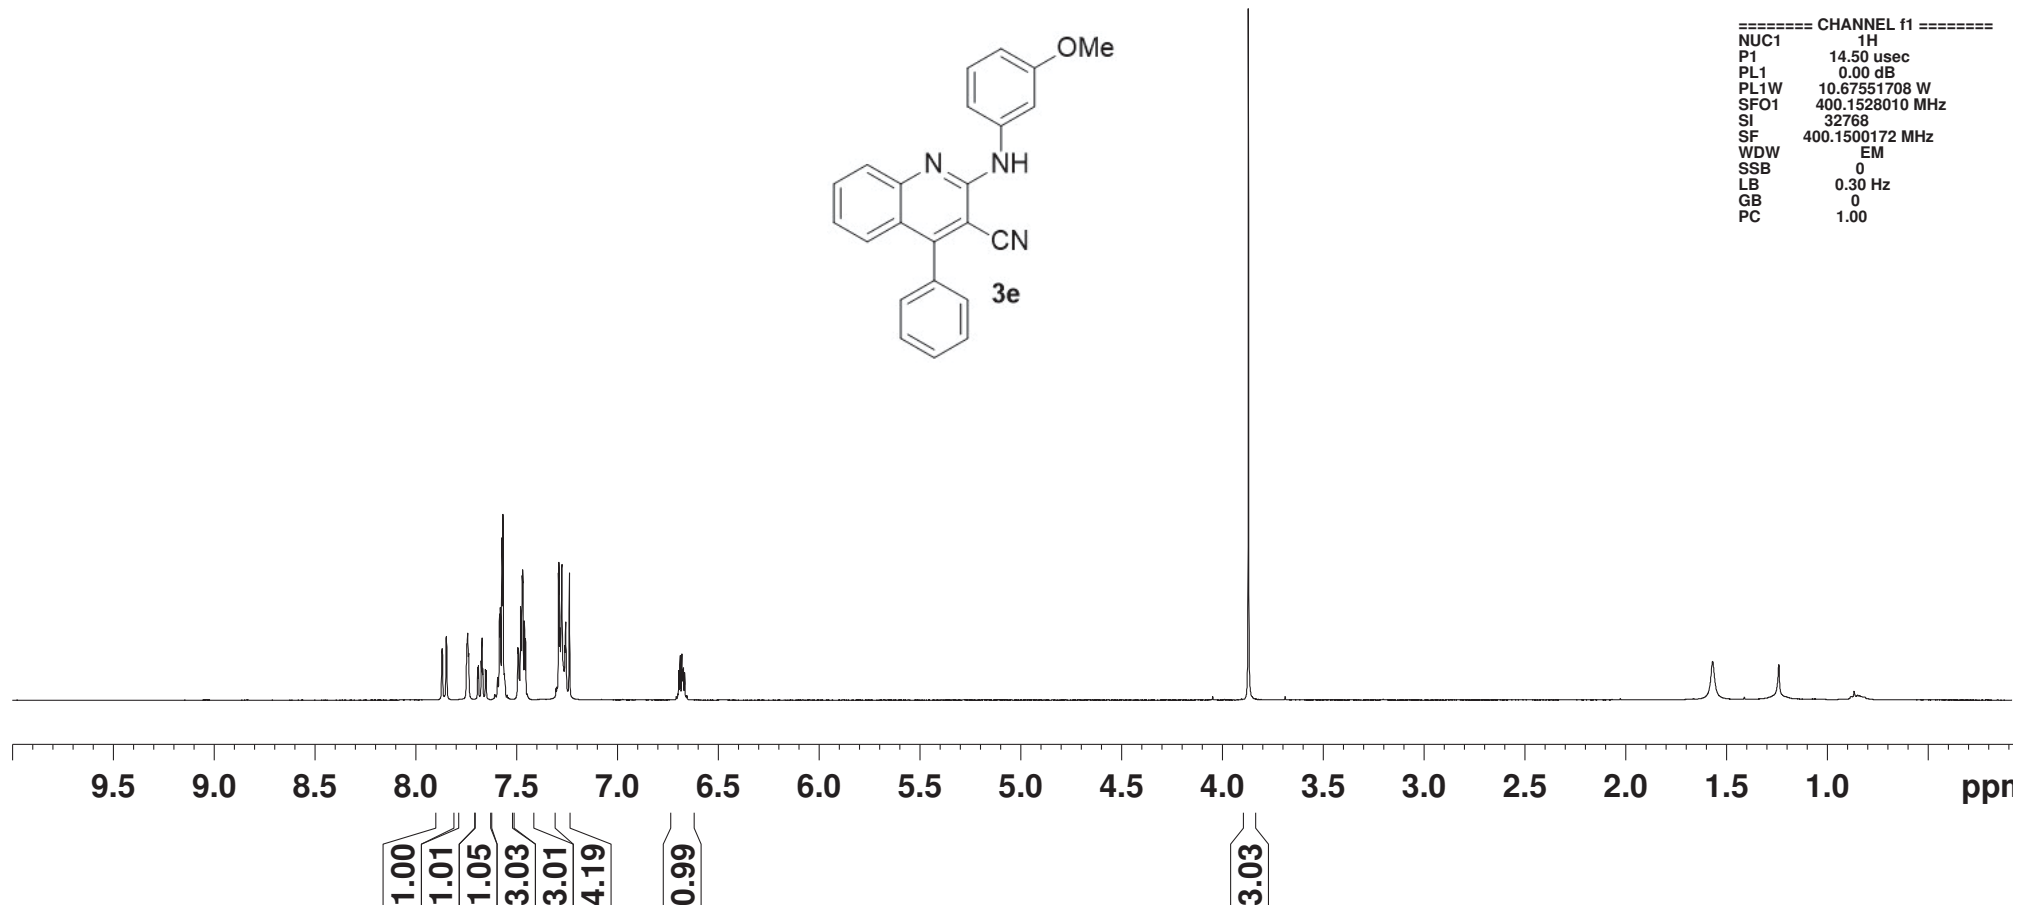

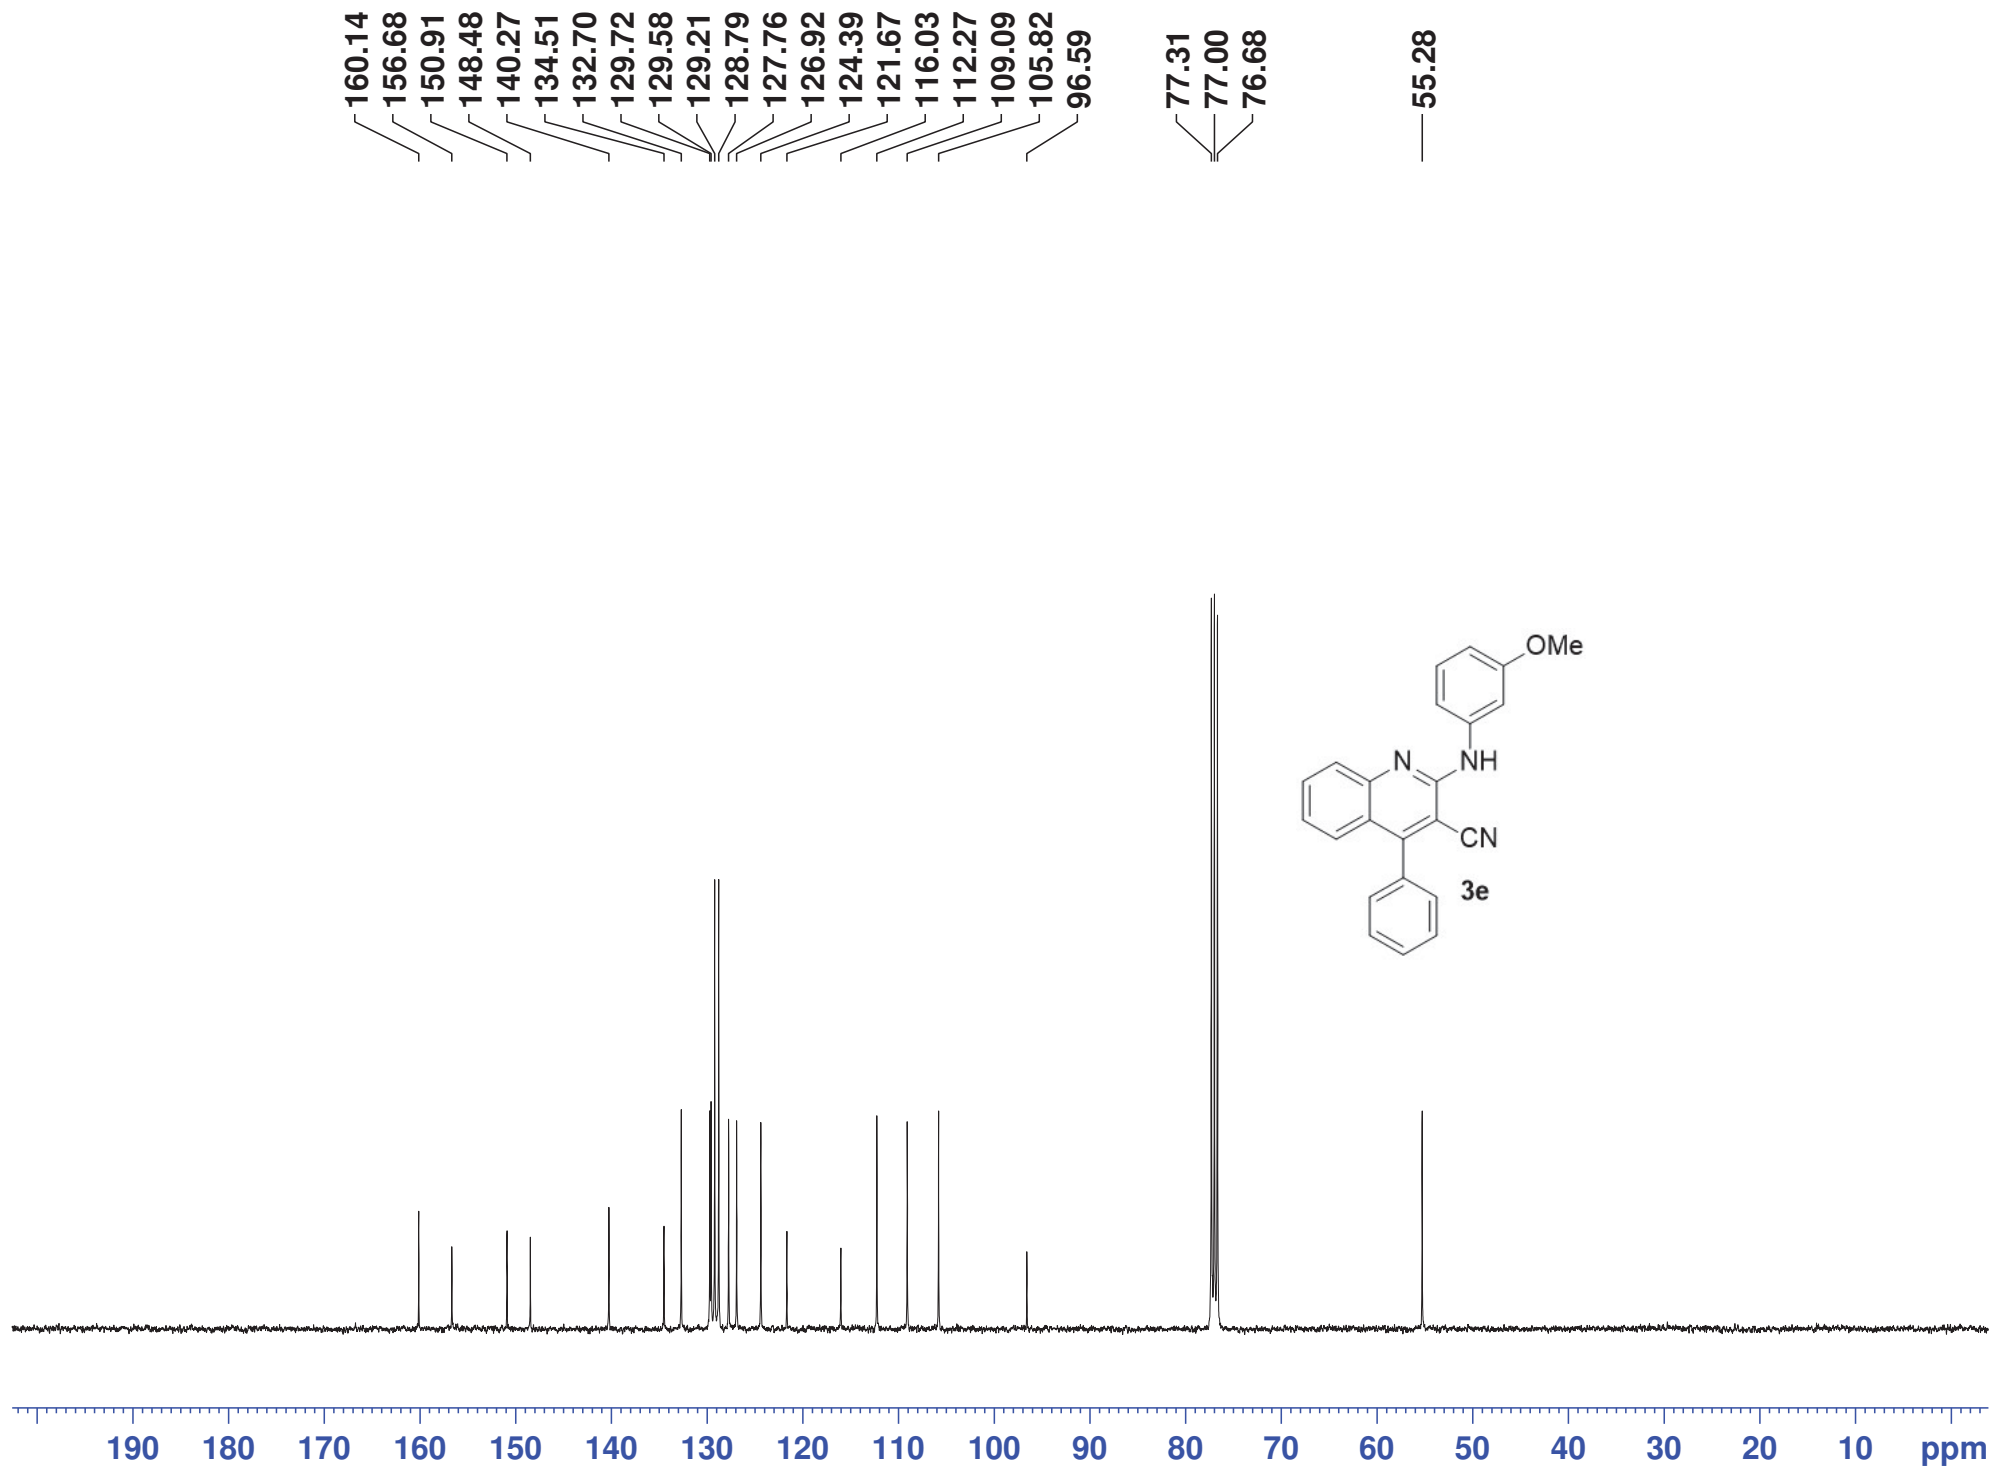



4OMePD, 2-ABP, MCN, 80deg, 5h, purified pale yellow solid

7.632  
7.618  
7.615  
7.590  
7.587  
7.580  
7.575  
7.567  
7.563  
7.556  
7.552  
7.483  
7.478  
7.470  
7.466  
7.463  
7.459  
7.454  
7.444  
7.442  
7.239  
7.236  
7.233  
7.219  
7.215  
7.212  
7.198  
7.195  
7.125  
6.969  
6.960  
6.955  
6.943  
6.938  
6.929  
3.831

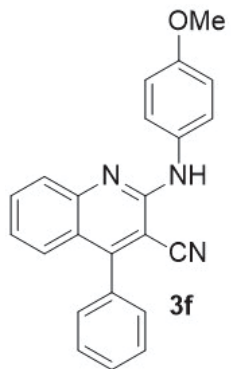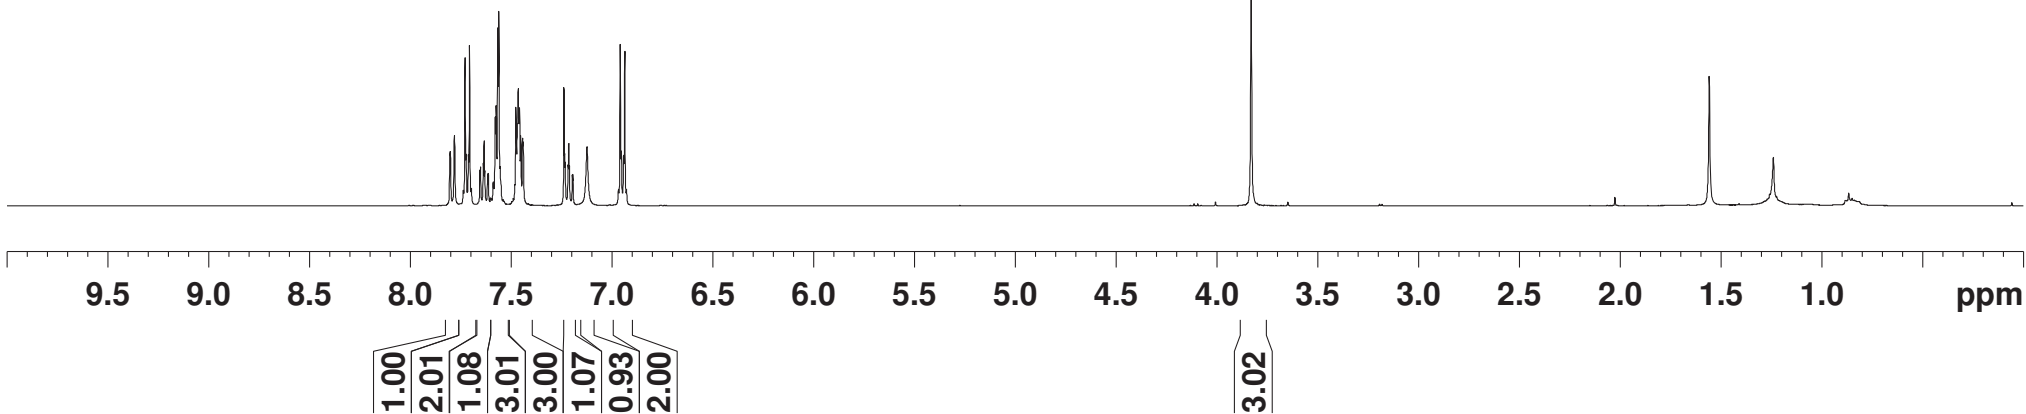

NAME mani 12-01-2018  
EXPNO 2  
PROCNO 1  
Date\_ 20190112  
Time 12.15  
INSTRUM spect  
PROBHD 5 mm PABBO BB-  
PULPROG zg30  
TD 32768  
SOLVENT CDCl3  
NS 30  
DS 0  
SWH 8223.685 Hz  
FIDRES 0.250967 Hz  
AQ 1.9923444 sec  
RG 203  
DW 60.800 usec  
DE 6.50 usec  
TE 298.0 K  
D1 1.0000000 sec  
TD0 1

===== CHANNEL f1 =====  
NUC1 1H  
P1 14.50 usec  
PL1 0.00 dB  
PL1W 10.67551708 W  
SFO1 400.1528010 MHz  
SI 32768  
SF 400.1500167 MHz  
WDW EM  
SSB 0  
LB 0.30 Hz  
GB 0  
PC 1.00

4OMePD, 2-ABP, MCN, 80deg, 5h, purified pale yellow solid

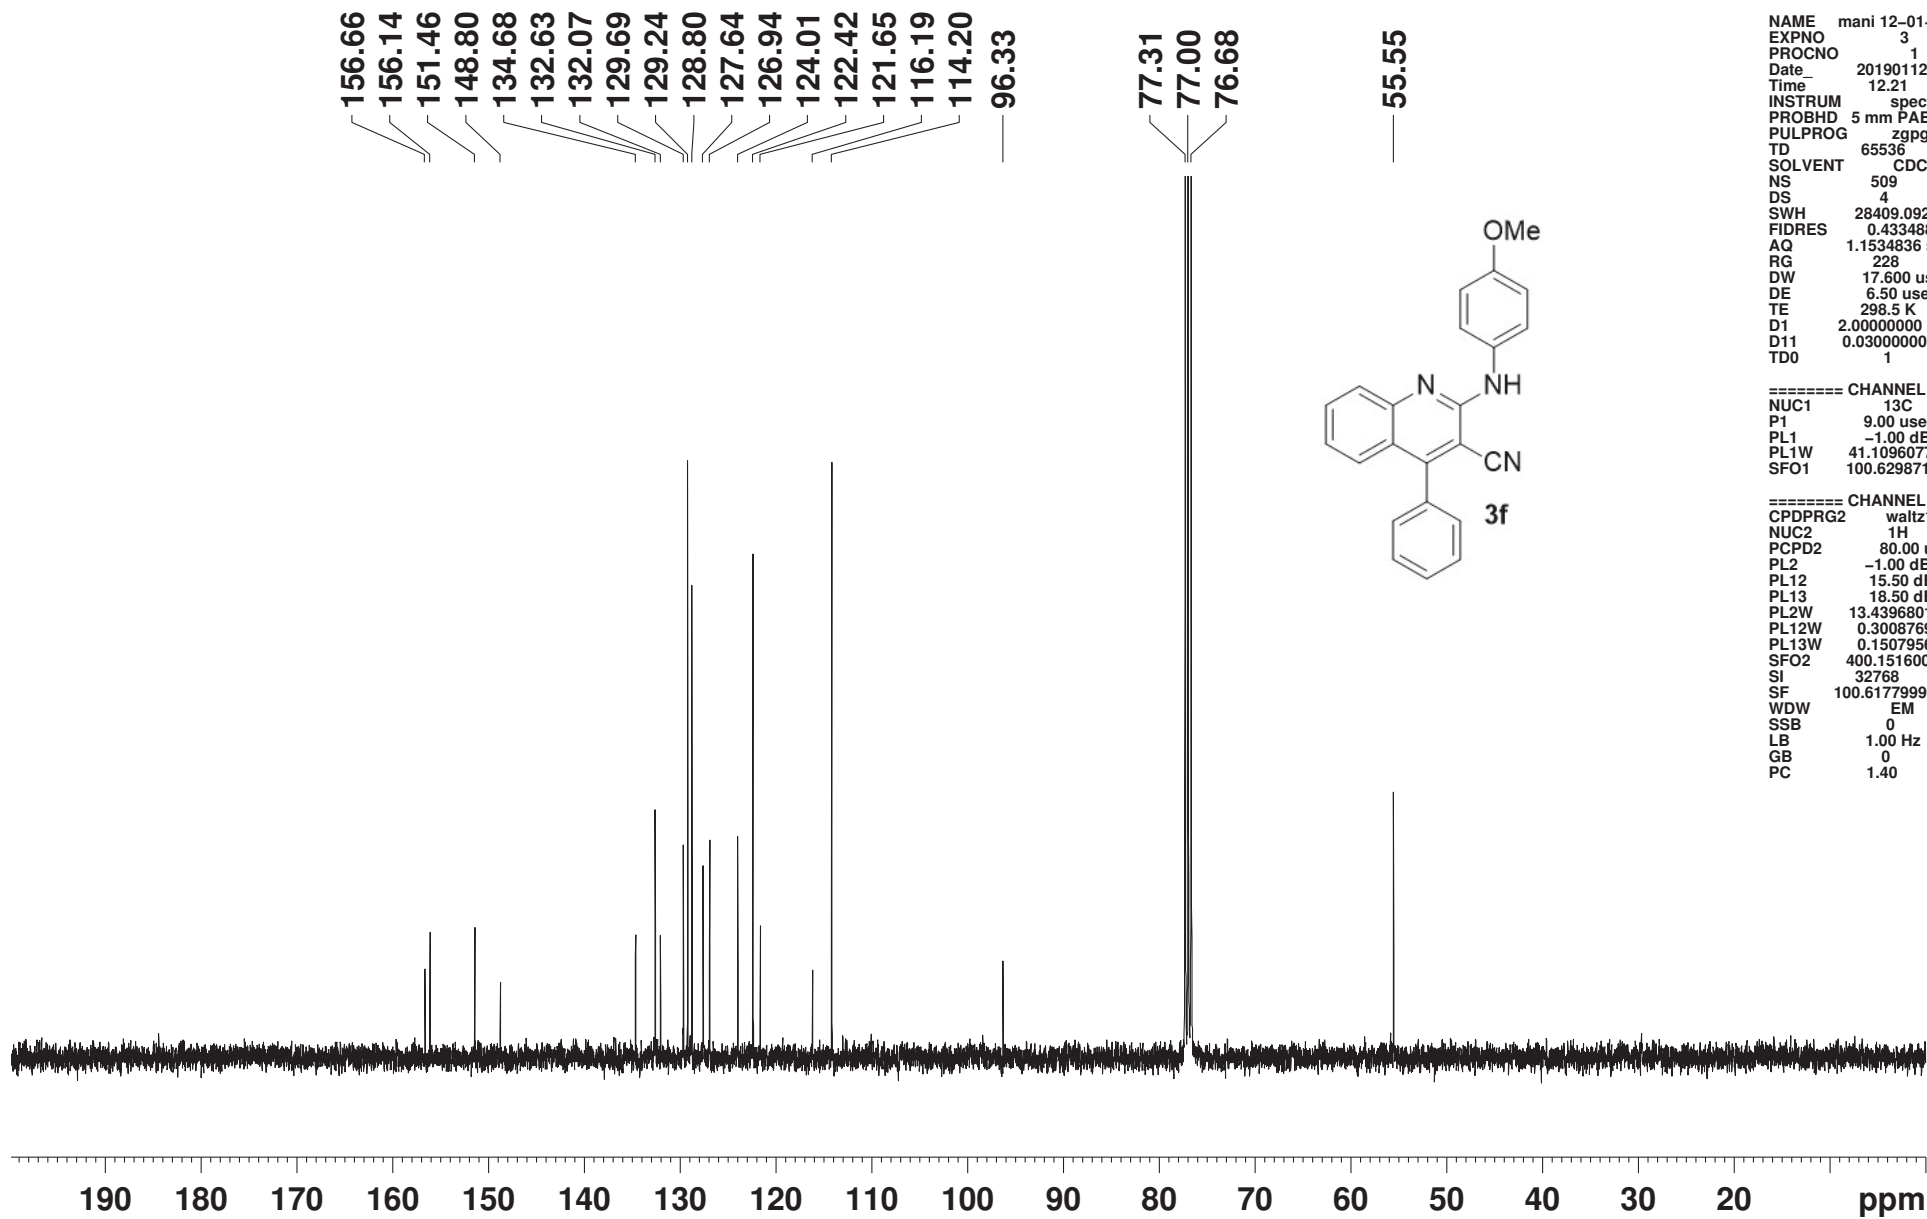

35diMePD, 2-ABP, MCN, 80deg, 5h, purified pale yellow solid

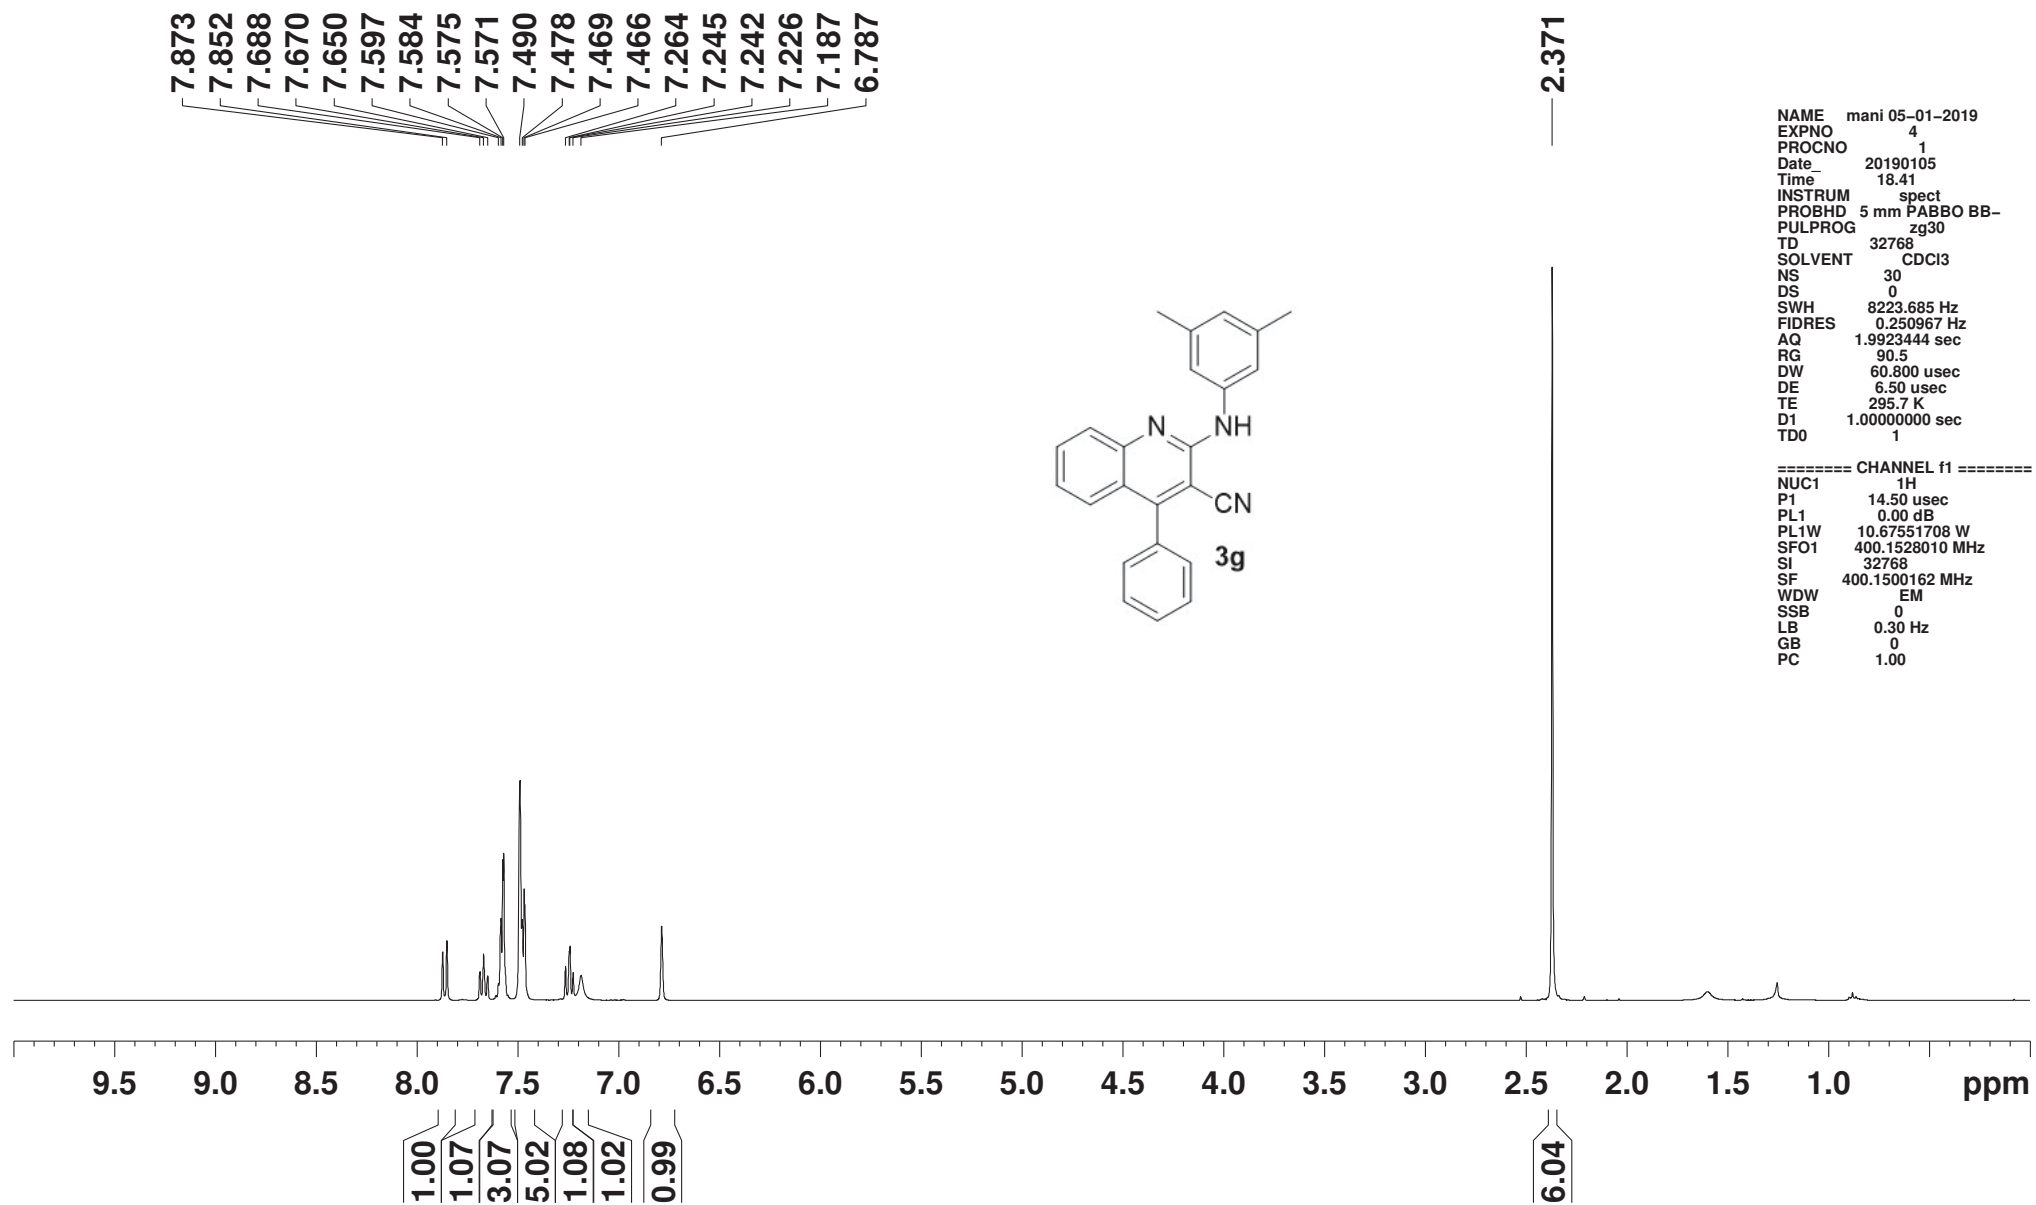

35diMePD, 2-ABP, MCN, 80deg, 5h, purified pale yellow solid

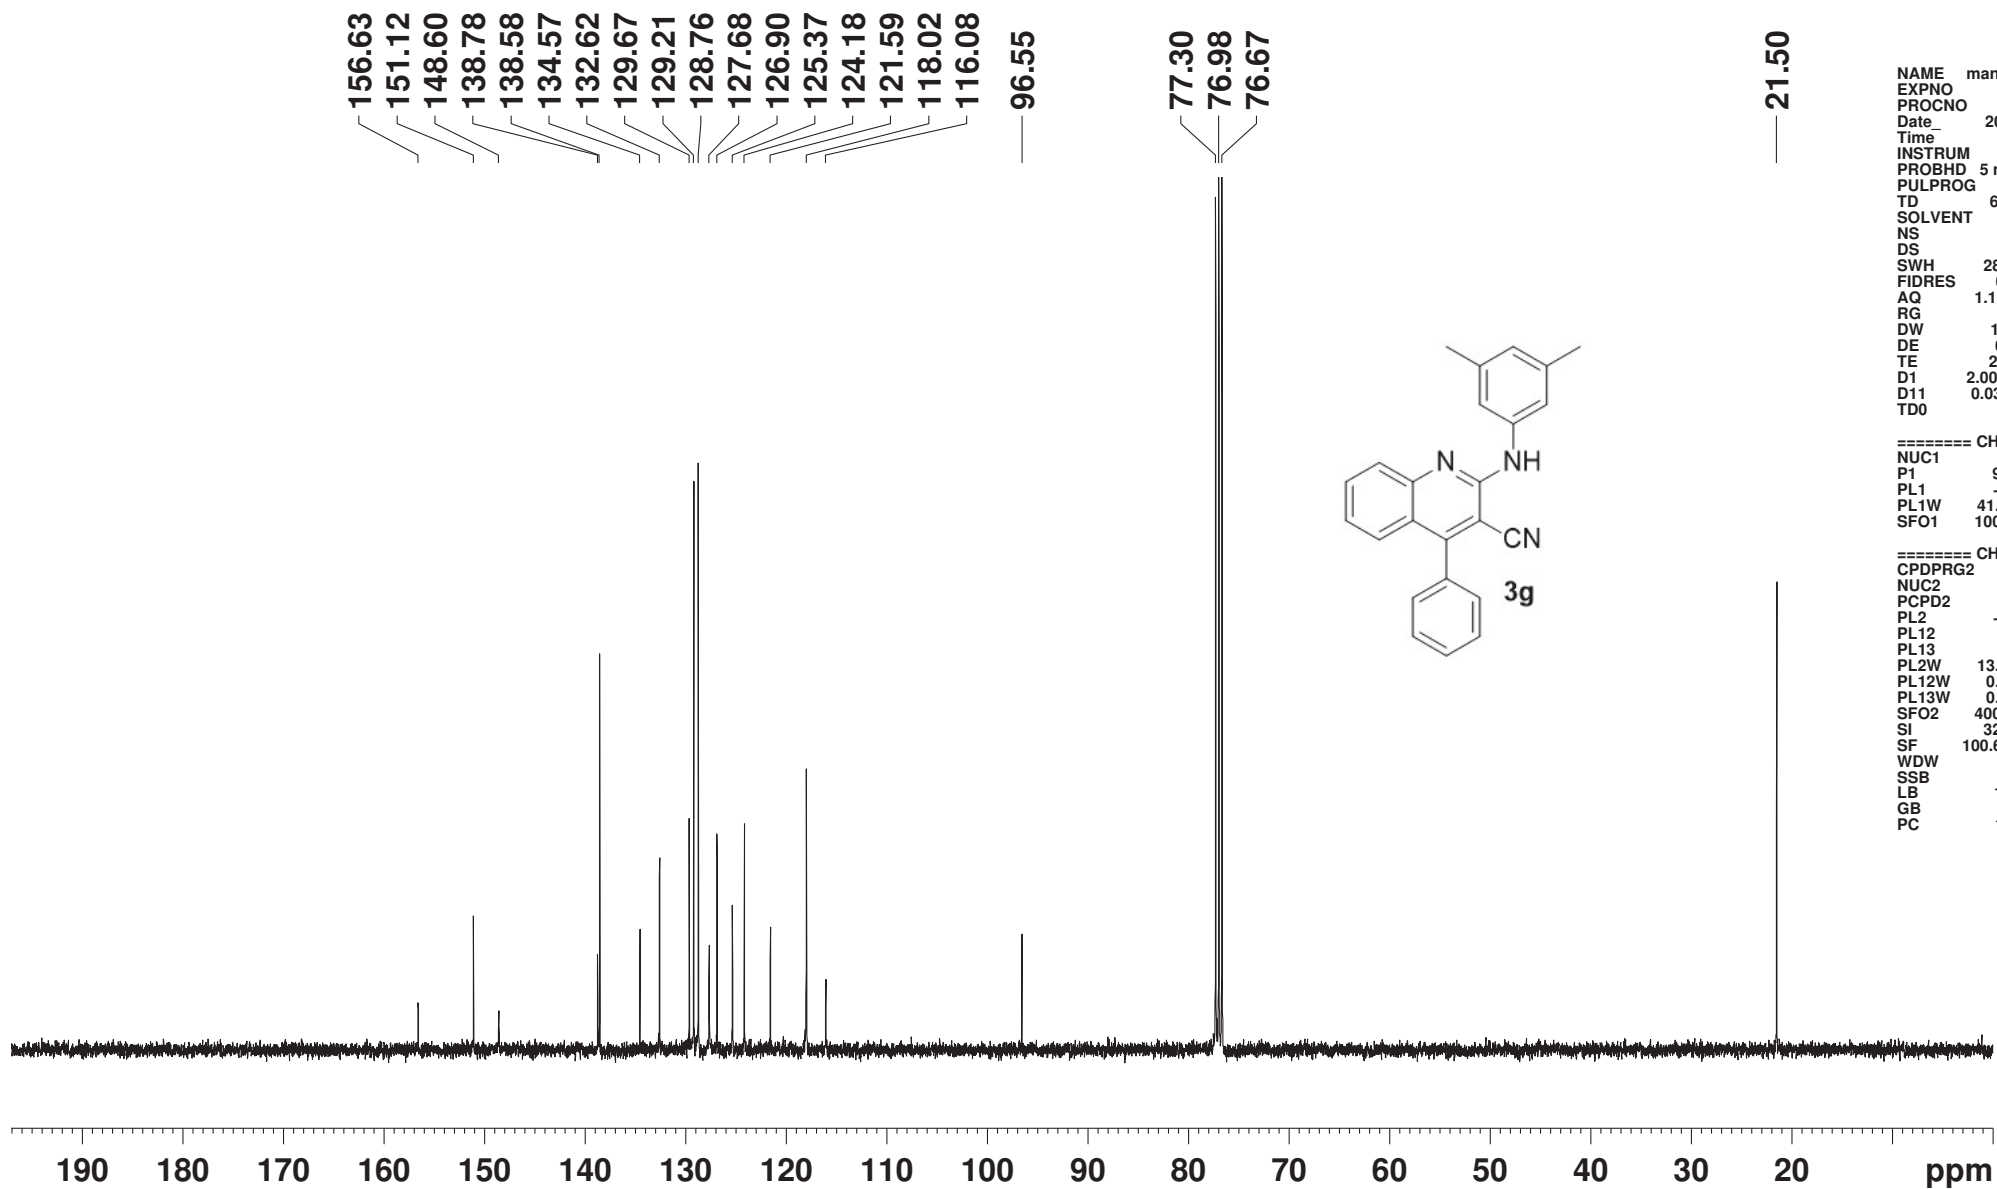

```
NAME mani 05-
EXPNO
PROCNO
Date_ 20190
Time 18.4
INSTRUM s
PROBHD 5 mm l
PULPROG z
TD 65536
SOLVENT C
NS 244
DS 4
SWH 28409
FIDRES 0.43
AQ 1.15348
RG 144
DW 17.60
DE 6.50
TE 295.9
D1 2.00000
D11 0.03000
TD0 1

===== CHANN
NUC1 13
P1 9.00
PL1 -1.00
PL1W 41.109
SFO1 100.625

===== CHANN
CPDPRG2 w
NUC2 11
PCPD2 80.
PL2 -1.00
PL12 15.5
PL13 18.5
PL2W 13.439
PL12W 0.300
PL13W 0.150
SFO2 400.151
SI 32768
SF 100.6178
WDW E
SSB 0
LB 1.00
GB 0
PC 1.40
```

7.848  
7.827  
7.665  
7.648  
7.631  
7.574  
7.565  
7.561  
7.522  
7.468  
7.458  
7.452  
7.243  
7.228  
7.225  
7.169  
7.149

2.308  
2.270

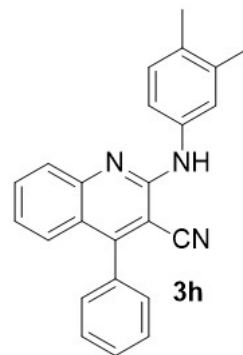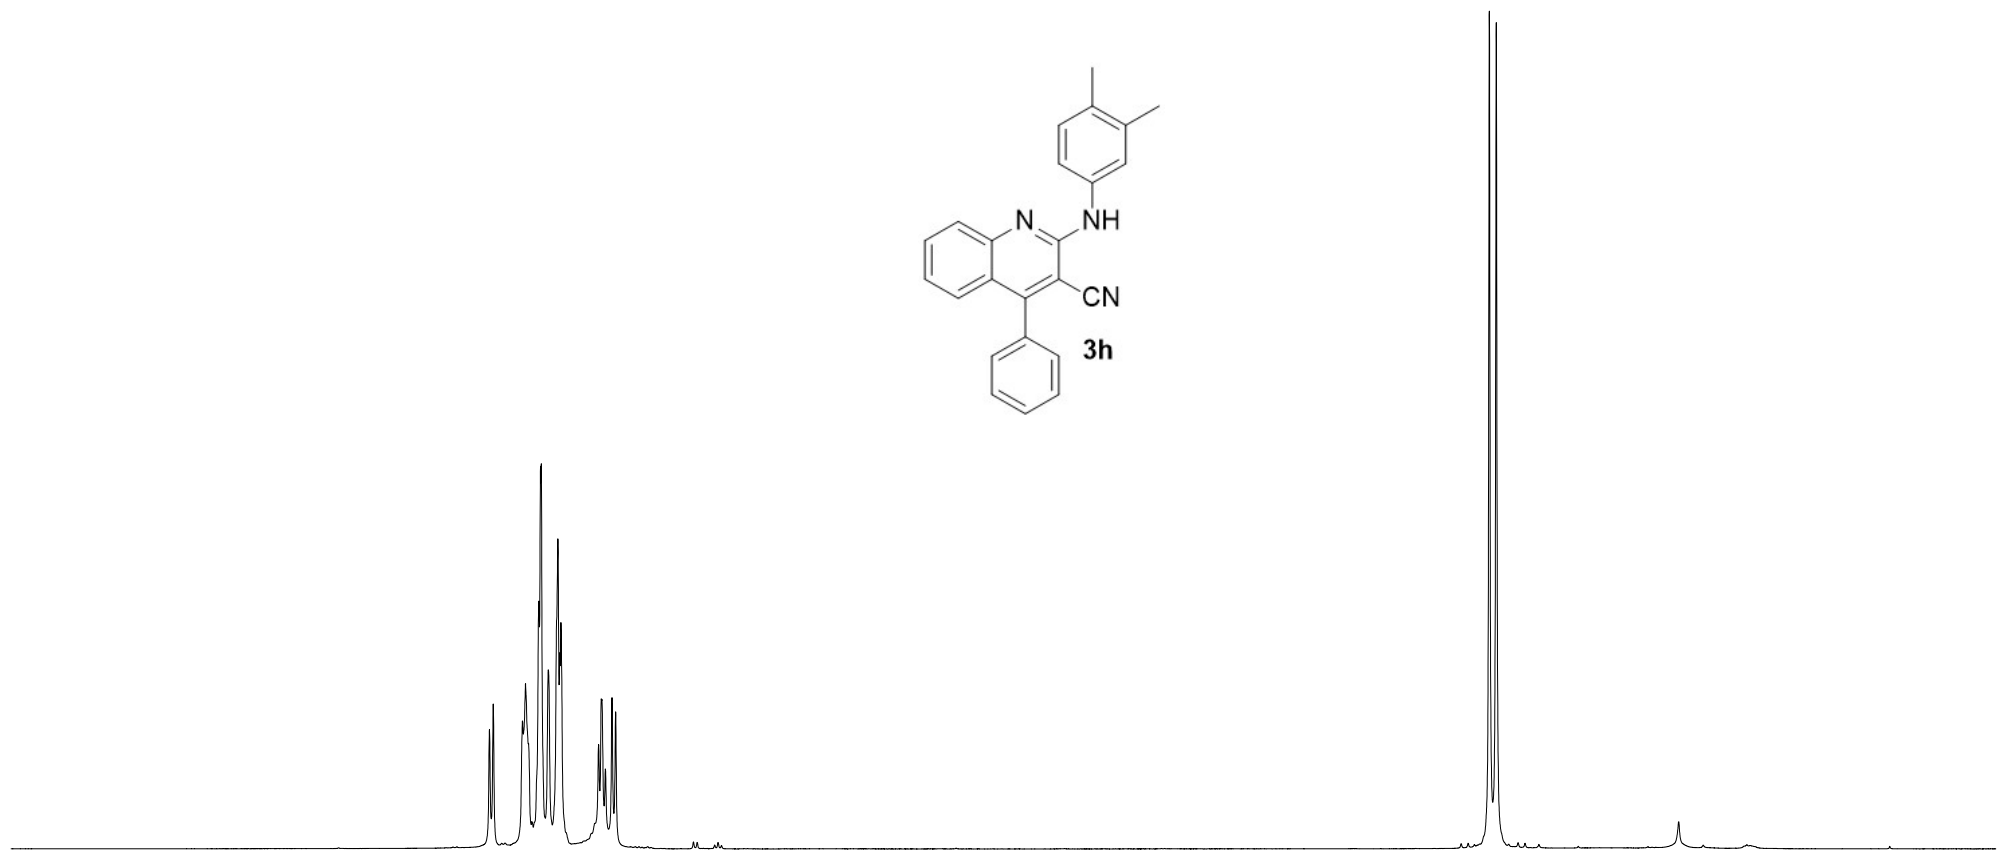

1.02  
2.08  
3.07  
1.04  
3.07  
2.00  
1.03

3.00  
3.03

S20

ppm

34-diMePD, MCN, 2-ABP, 80deg, 5h, purified pale yellow solid

NAME mani 28-12-2018  
EXPNO 3  
PROCNO 1  
Date\_ 20181228  
Time 16.55 h  
INSTRUM spect  
PROBHD Z108618\_0411 (  
PULPROG zgpg30  
TD 65536  
SOLVENT CDCl3  
NS 203  
DS 4  
SWH 28409.092 Hz  
FIDRES 0.866977 Hz  
AQ 1.1534836 sec  
RG 212.49  
DW 17.600 usec  
DE 6.50 usec  
TE 297.2 K  
D1 2.00000000 sec  
D11 0.03000000 sec  
TD0 1  
SFO1 100.6258487 MHz  
NUC1 13C  
P1 10.50 usec  
SI 32768  
SF 100.6127765 MHz  
WDB EM  
SSB 0  
LB 3.00 Hz  
GB 0  
PC 1.40

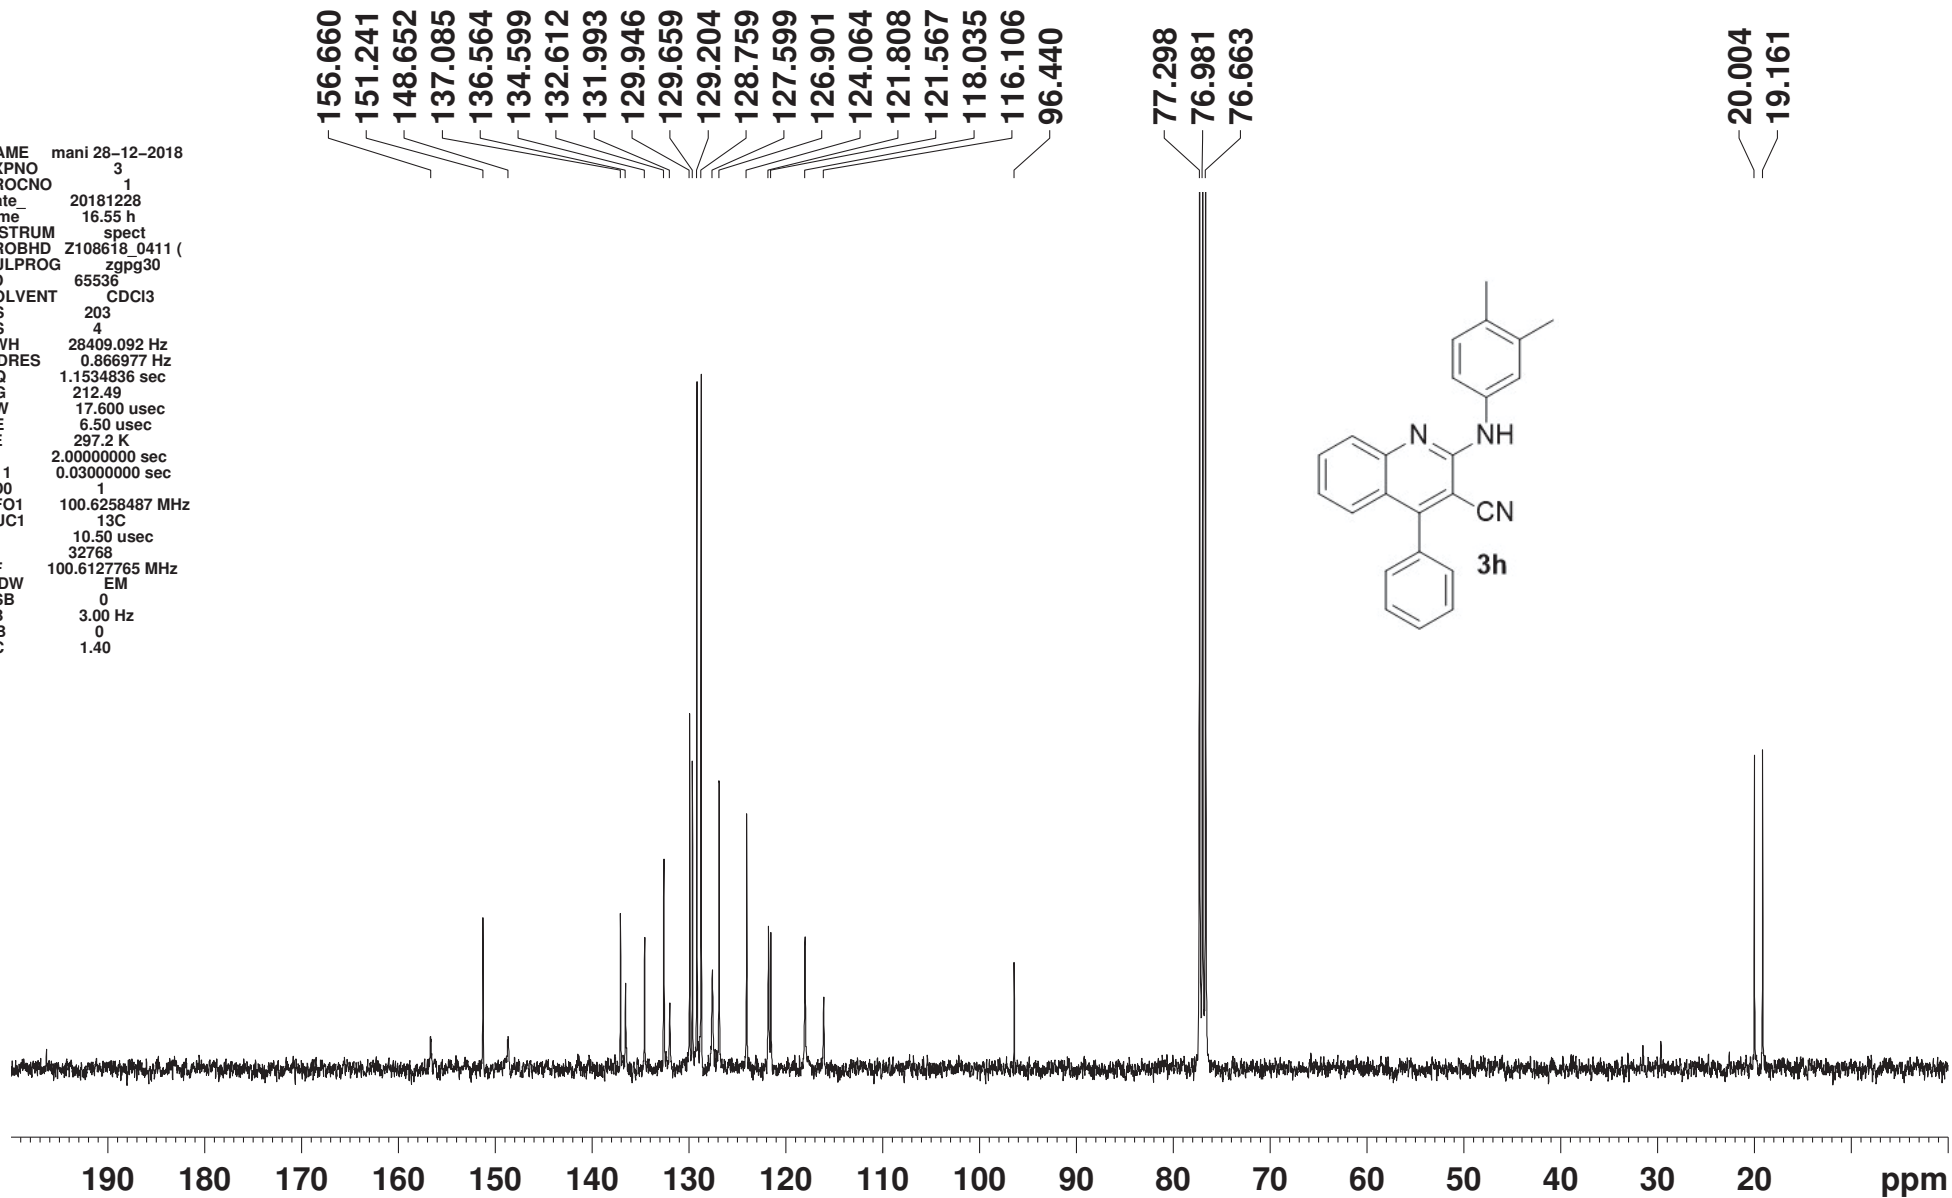

246triMePD, 2-ABP, malononitrile, 120deg, 5h, purified pale yellow solid

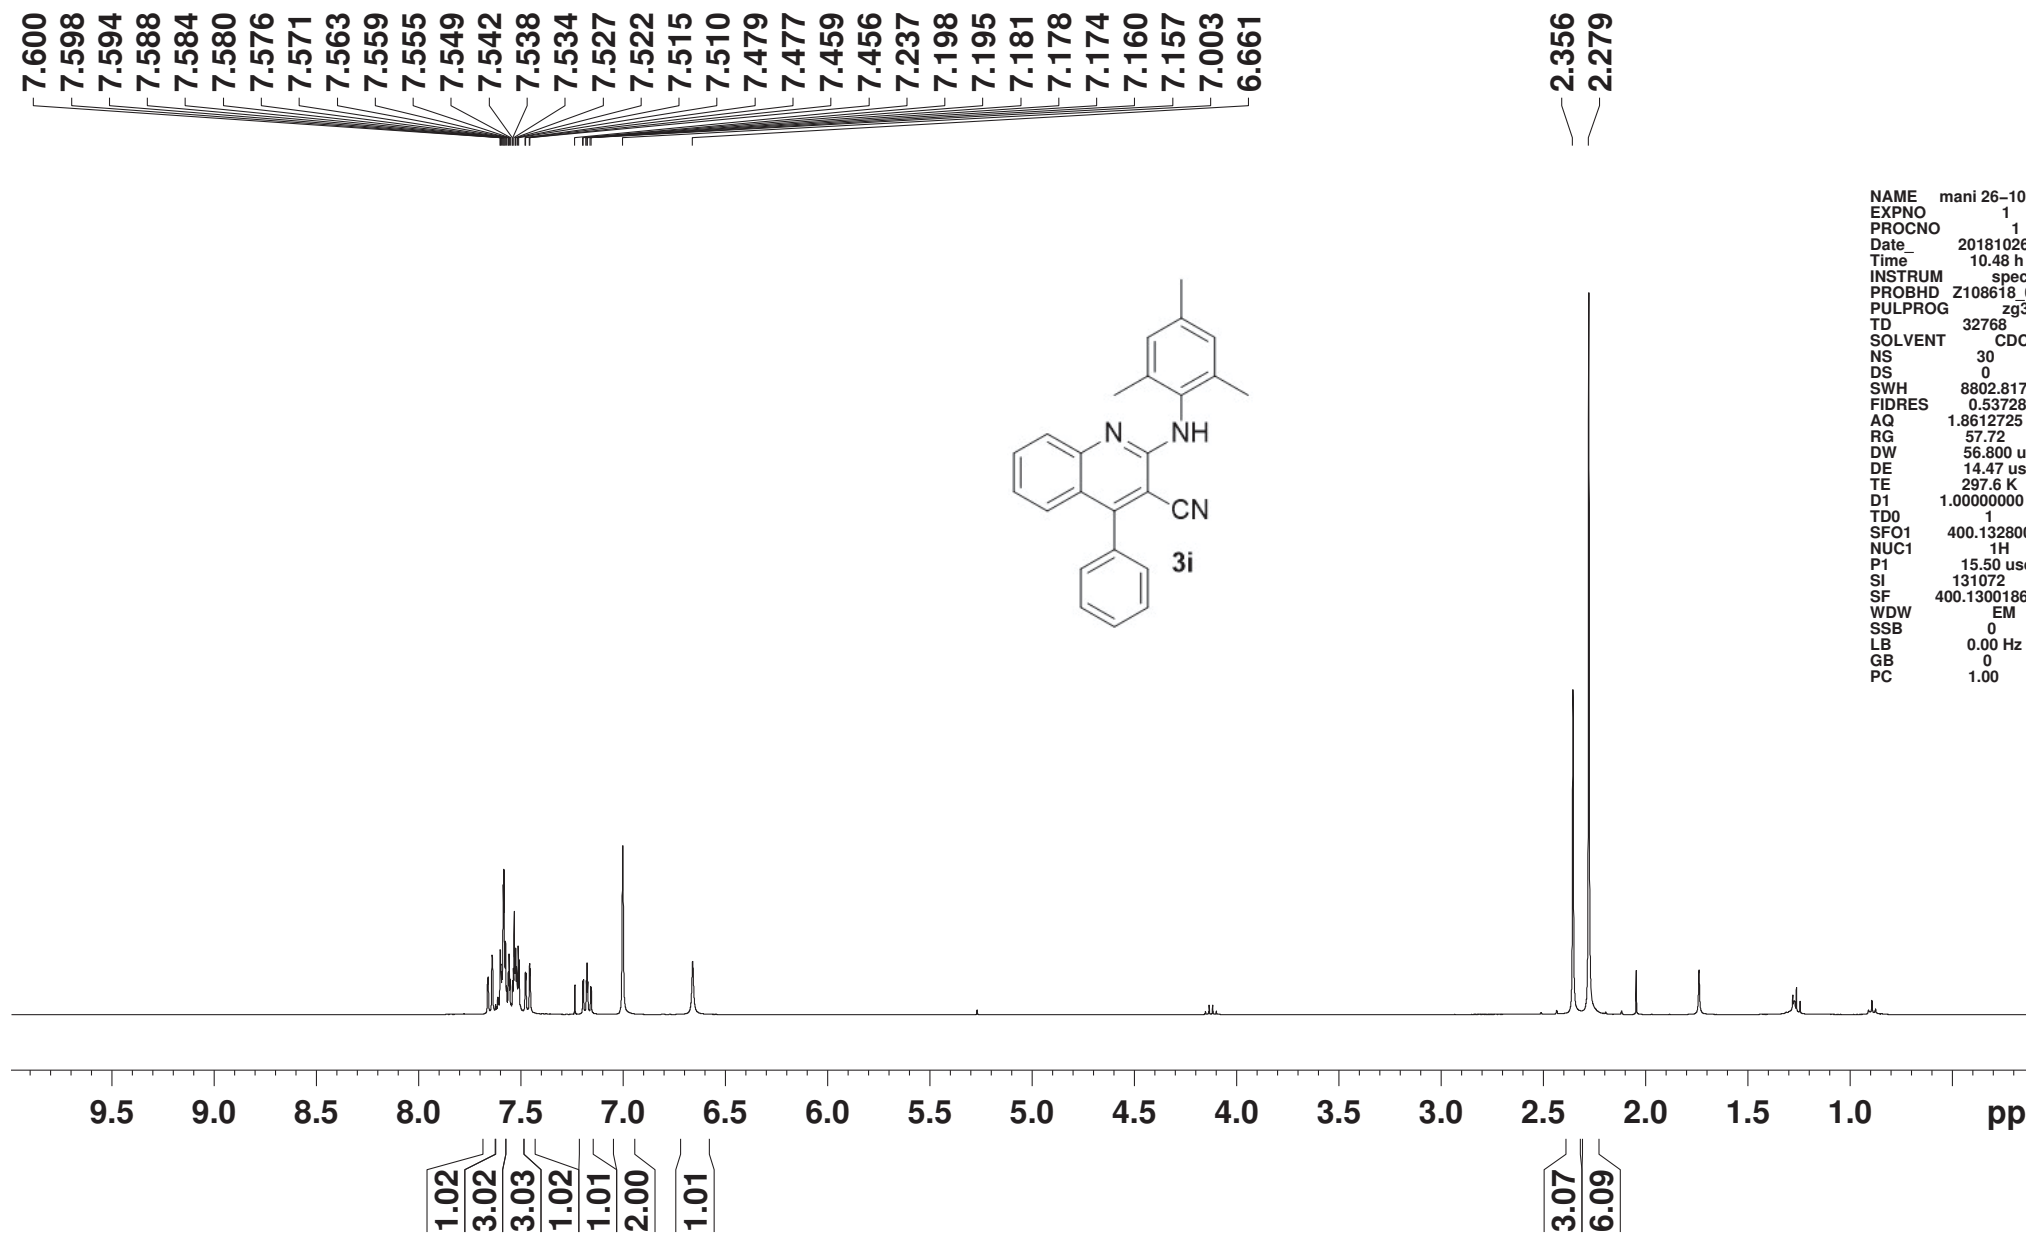

246triMePD, 2-ABP, malononitrile, 120deg, 5h, purified pale yellow solid

NAME mani 26-10-2018  
EXPNO 2  
PROCNO 1  
Date\_ 20181026  
Time 10.57 h  
INSTRUM spect  
PROBHD Z108618\_0411 (  
PULPROG zgpg30  
TD 65536  
SOLVENT CDCl3  
NS 124  
DS 4  
SWH 28409.092 Hz  
FIDRES 0.866977 Hz  
AQ 1.1534836 sec  
RG 212.49  
DW 17.600 usec  
DE 6.50 usec  
TE 298.5 K  
D1 2.00000000 sec  
D11 0.03000000 sec  
TD0 1  
SFO1 100.6258487 MHz  
NUC1 13C  
P1 10.50 usec  
SI 32768  
SF 100.6127795 MHz  
WDW EM  
SSB 0  
LB 3.00 Hz  
GB 0  
PC 1.40

156.554  
152.609  
149.340  
136.532  
135.793  
134.725  
132.691  
132.340  
129.579  
129.252  
128.953  
128.713  
127.639  
126.866  
123.527  
121.393  
116.391

95.362

77.300  
76.982  
76.664

20.989  
18.621

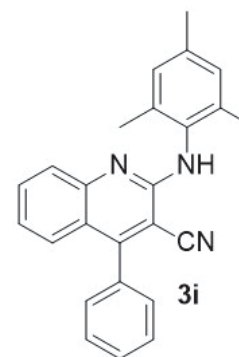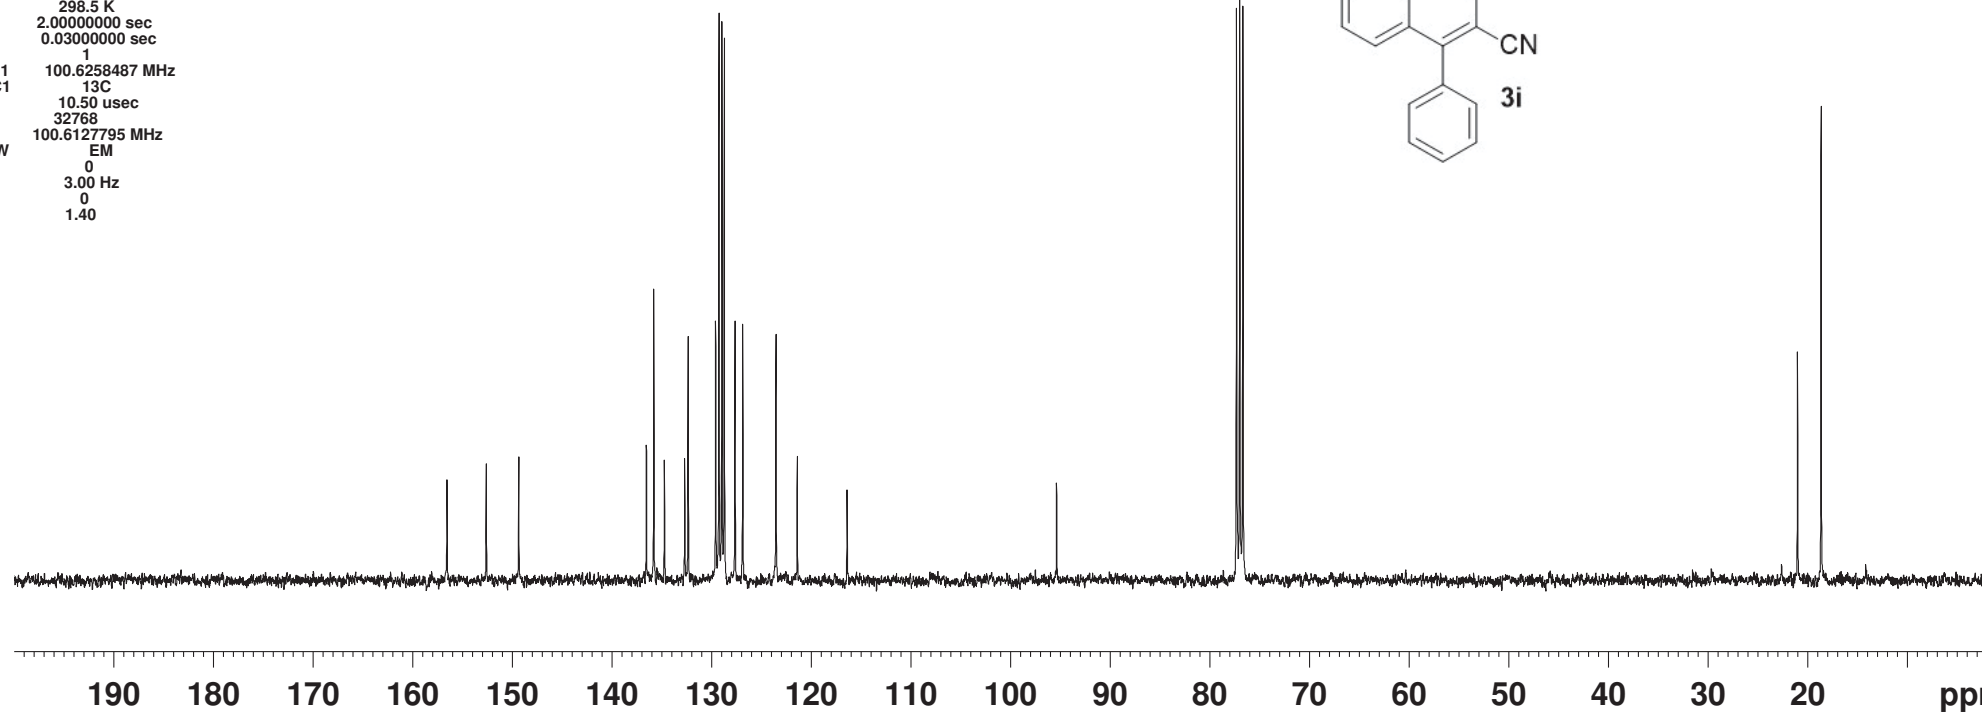



1-naphthylPD, 2-ABP, MCN, 80deg, 5h, purified pale yellow solid

7.892  
7.781  
7.760  
7.743  
7.723  
7.660  
7.657  
7.642  
7.639  
7.635  
7.620  
7.612  
7.609  
7.607  
7.598  
7.594  
7.587  
7.582  
7.576  
7.566  
7.561  
7.556  
7.548  
7.544  
7.541  
7.530  
7.524  
7.521  
7.512  
7.498  
7.494  
7.490  
7.270  
7.267  
7.252  
7.250  
7.246  
7.240  
7.232  
7.229

1.556

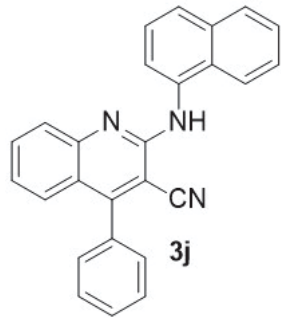

NAME mani 08-01-2019  
EXPNO 4  
PROCNO 1  
Date\_ 20190108  
Time 20.39  
INSTRUM spect  
PROBHD 5 mm PABBO BB  
PULPROG zg30  
TD 32768  
SOLVENT CDCl3  
NS 15  
DS 0  
SWH 8223.685 Hz  
FIDRES 0.250967 Hz  
AQ 1.9923444 sec  
RG 228  
DW 60.800 usec  
DE 6.50 usec  
TE 297.2 K  
D1 1.00000000 sec  
TD0 1

===== CHANNEL f1 =====  
NUC1 1H  
P1 14.50 usec  
PL1 0.00 dB  
PL1W 10.67551708 W  
SFO1 400.1528010 MHz  
SI 32768  
SF 400.1500165 MHz  
WDW EM  
SSB 0  
LB 0.30 Hz  
GB 0  
PC 1.00

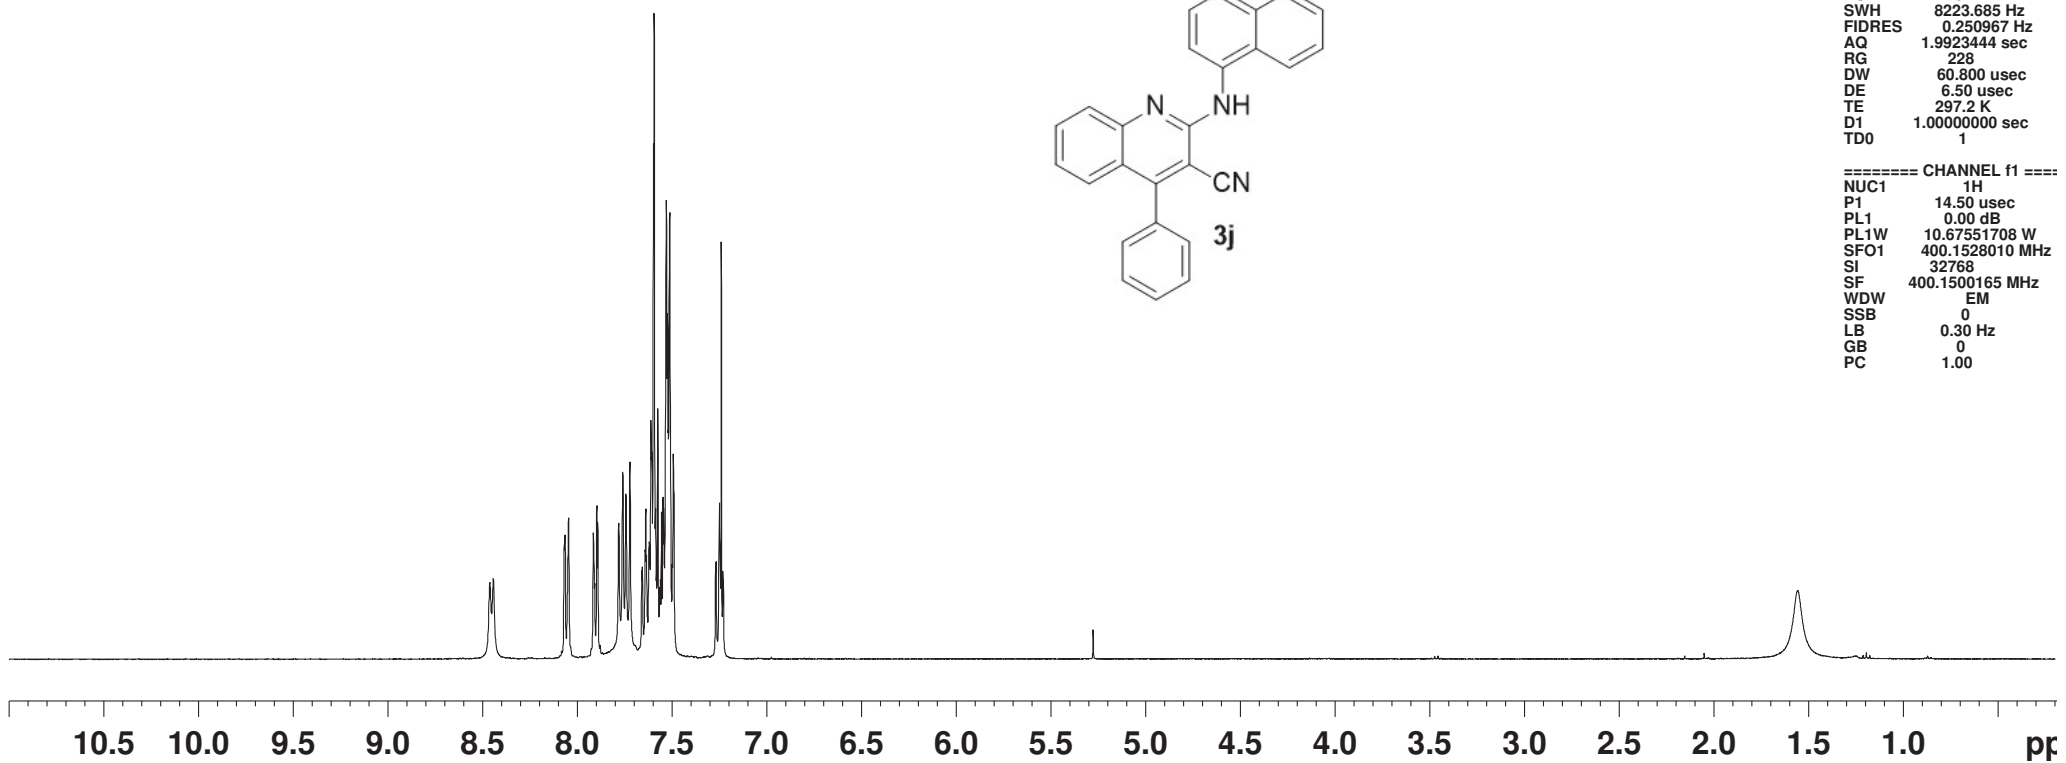

1.00  
1.07  
1.10  
2.89  
2.13  
3.13  
5.19  
1.27

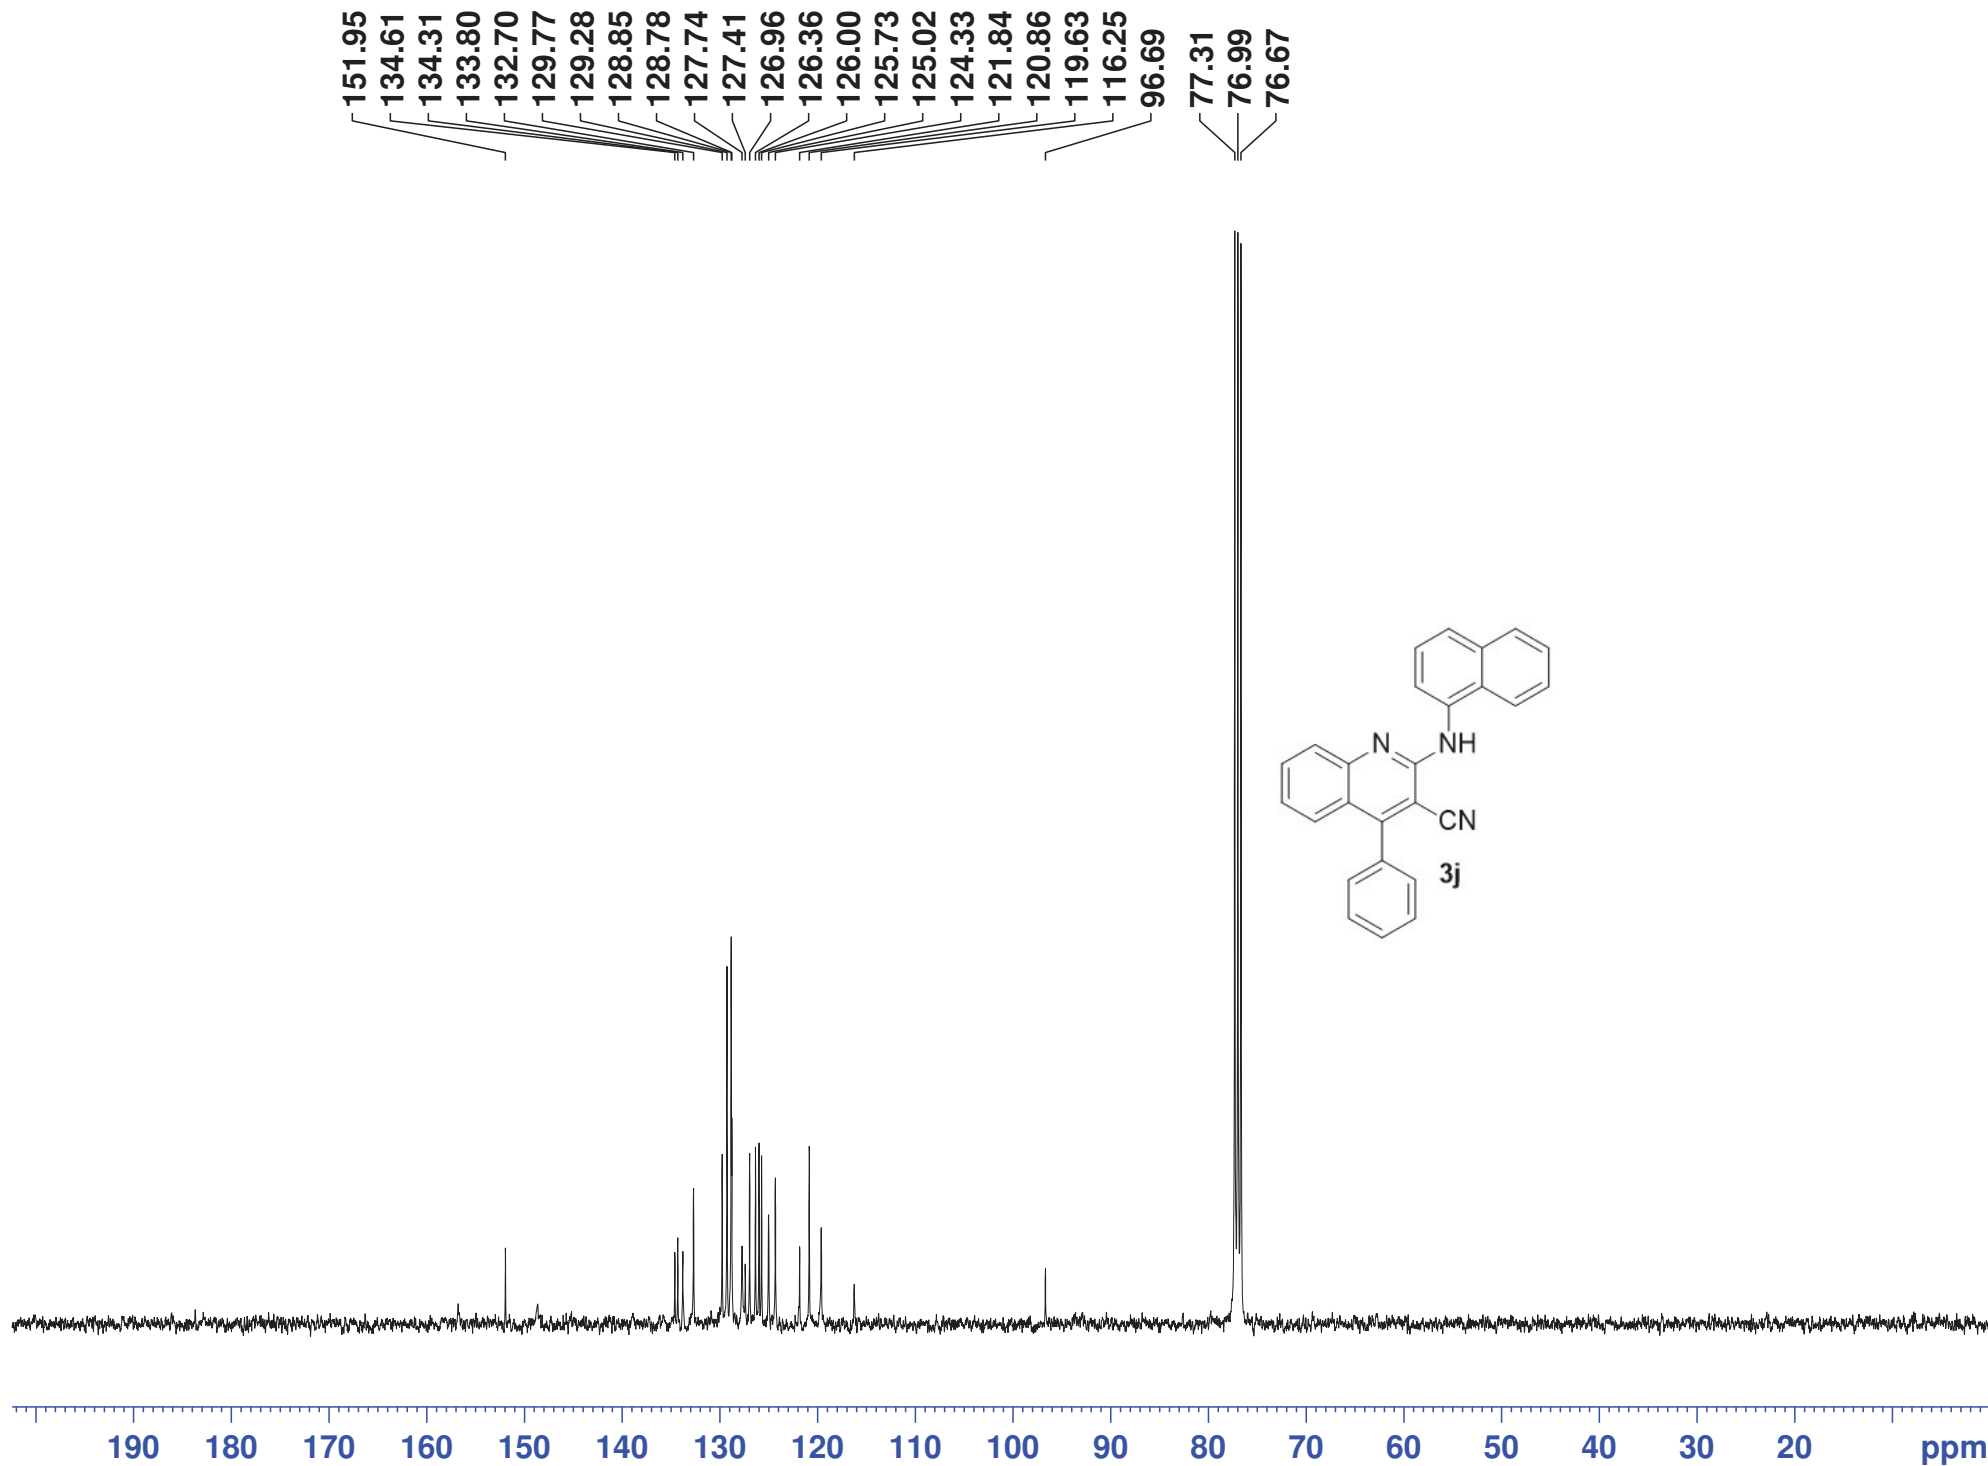

2PhPD, ABP, MCN, 80deg, 5h, purified pale yellow solid

8.836  
8.819  
7.873  
7.853  
7.683  
7.665  
7.646  
7.527  
7.518  
7.512  
7.486  
7.460  
7.446  
7.411  
7.402  
7.395  
7.363  
7.334  
7.315  
7.256  
7.240  
7.219  
7.211  
7.192  
7.174

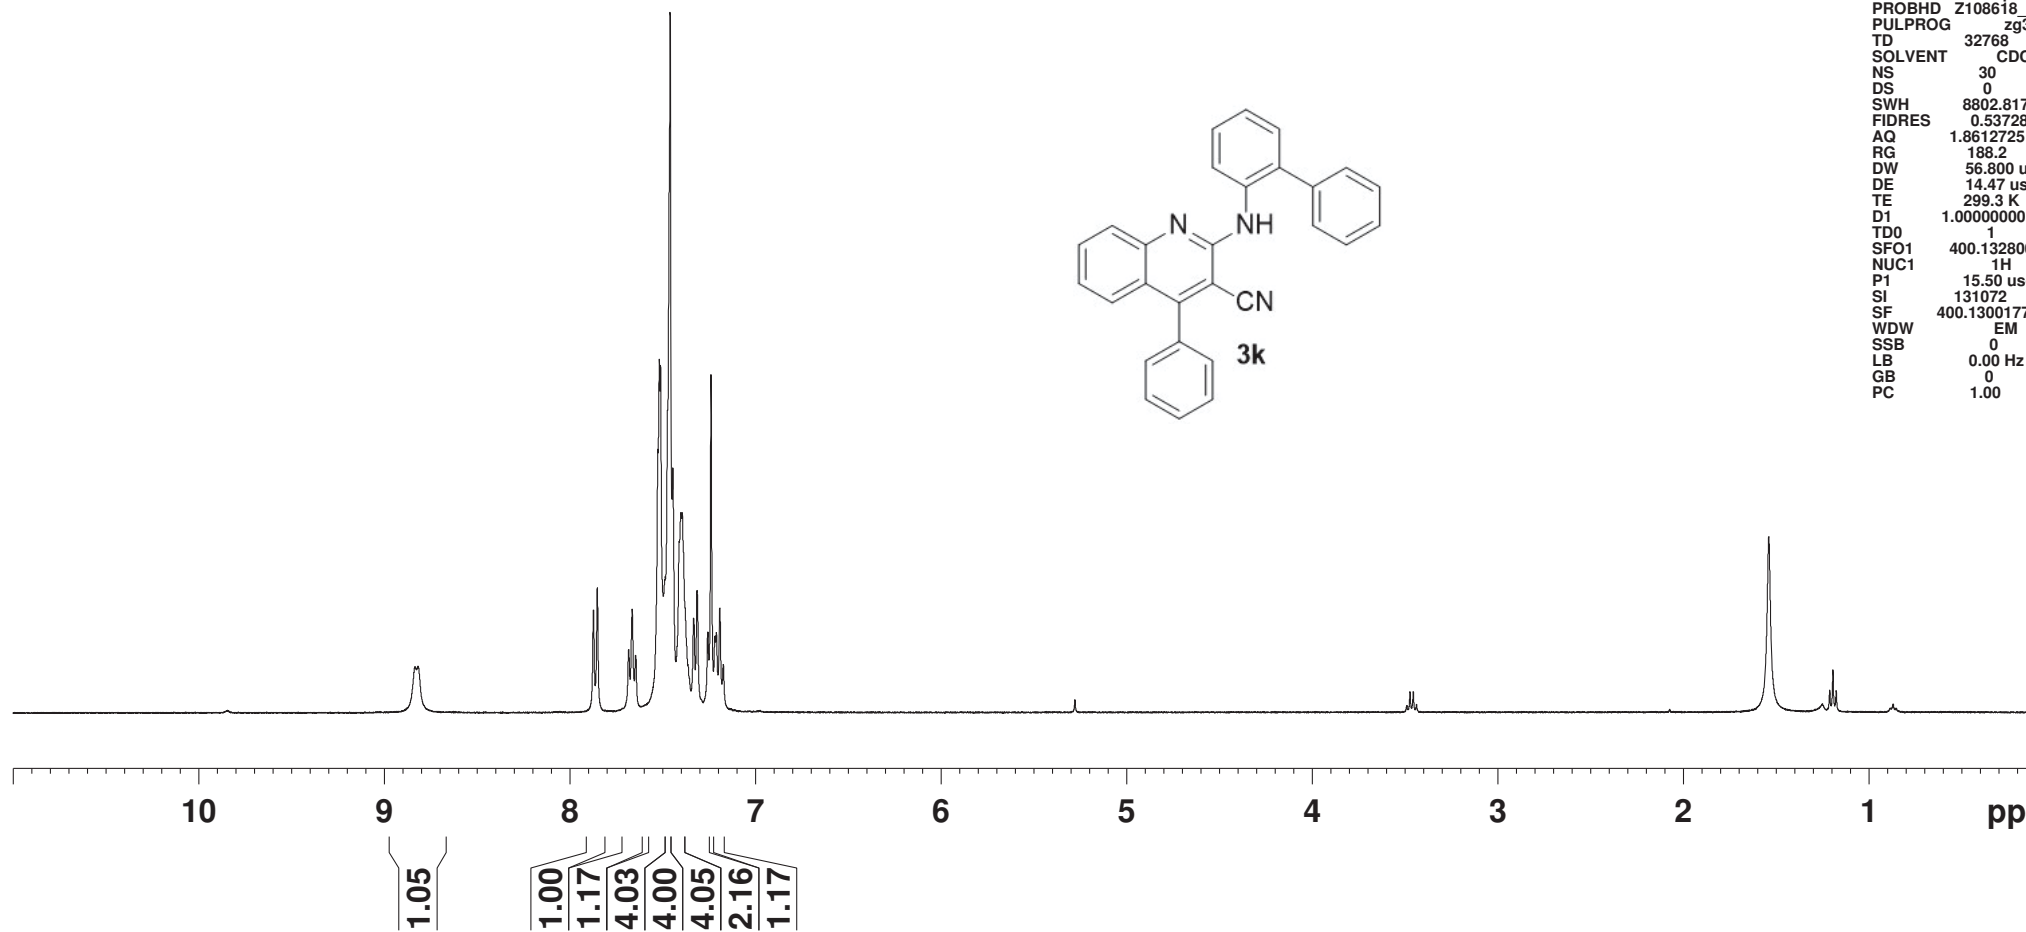

NAME mani 28-01  
EXPNO 5  
PROCNO 1  
Date\_ 20190126  
Time 19.51 h  
INSTRUM spec  
PROBHD Z108618\_1  
PULPROG zg3  
TD 32768  
SOLVENT CDC  
NS 30  
DS 0  
SWH 8802.817  
FIDRES 0.53728  
AQ 1.8612725  
RG 188.2  
DW 56.800 u  
DE 14.47 us  
TE 299.3 K  
D1 1.0000000  
TD0 1  
SFO1 400.132801  
NUC1 1H  
P1 15.50 us  
SI 131072  
SF 400.1300177  
WDW EM  
SSB 0  
LB 0.00 Hz  
GB 0  
PC 1.00

2PhPD, ABP, MCN, 80deg, 5h, purified pale yellow solid

156.610  
151.161  
148.473  
138.046  
136.249  
134.476  
132.612  
130.164  
129.794  
129.621  
129.286  
128.899  
128.688  
128.151  
127.995  
127.677  
126.924  
124.290  
123.295  
121.733  
120.765  
115.310  
97.065  
77.303  
76.986  
76.668

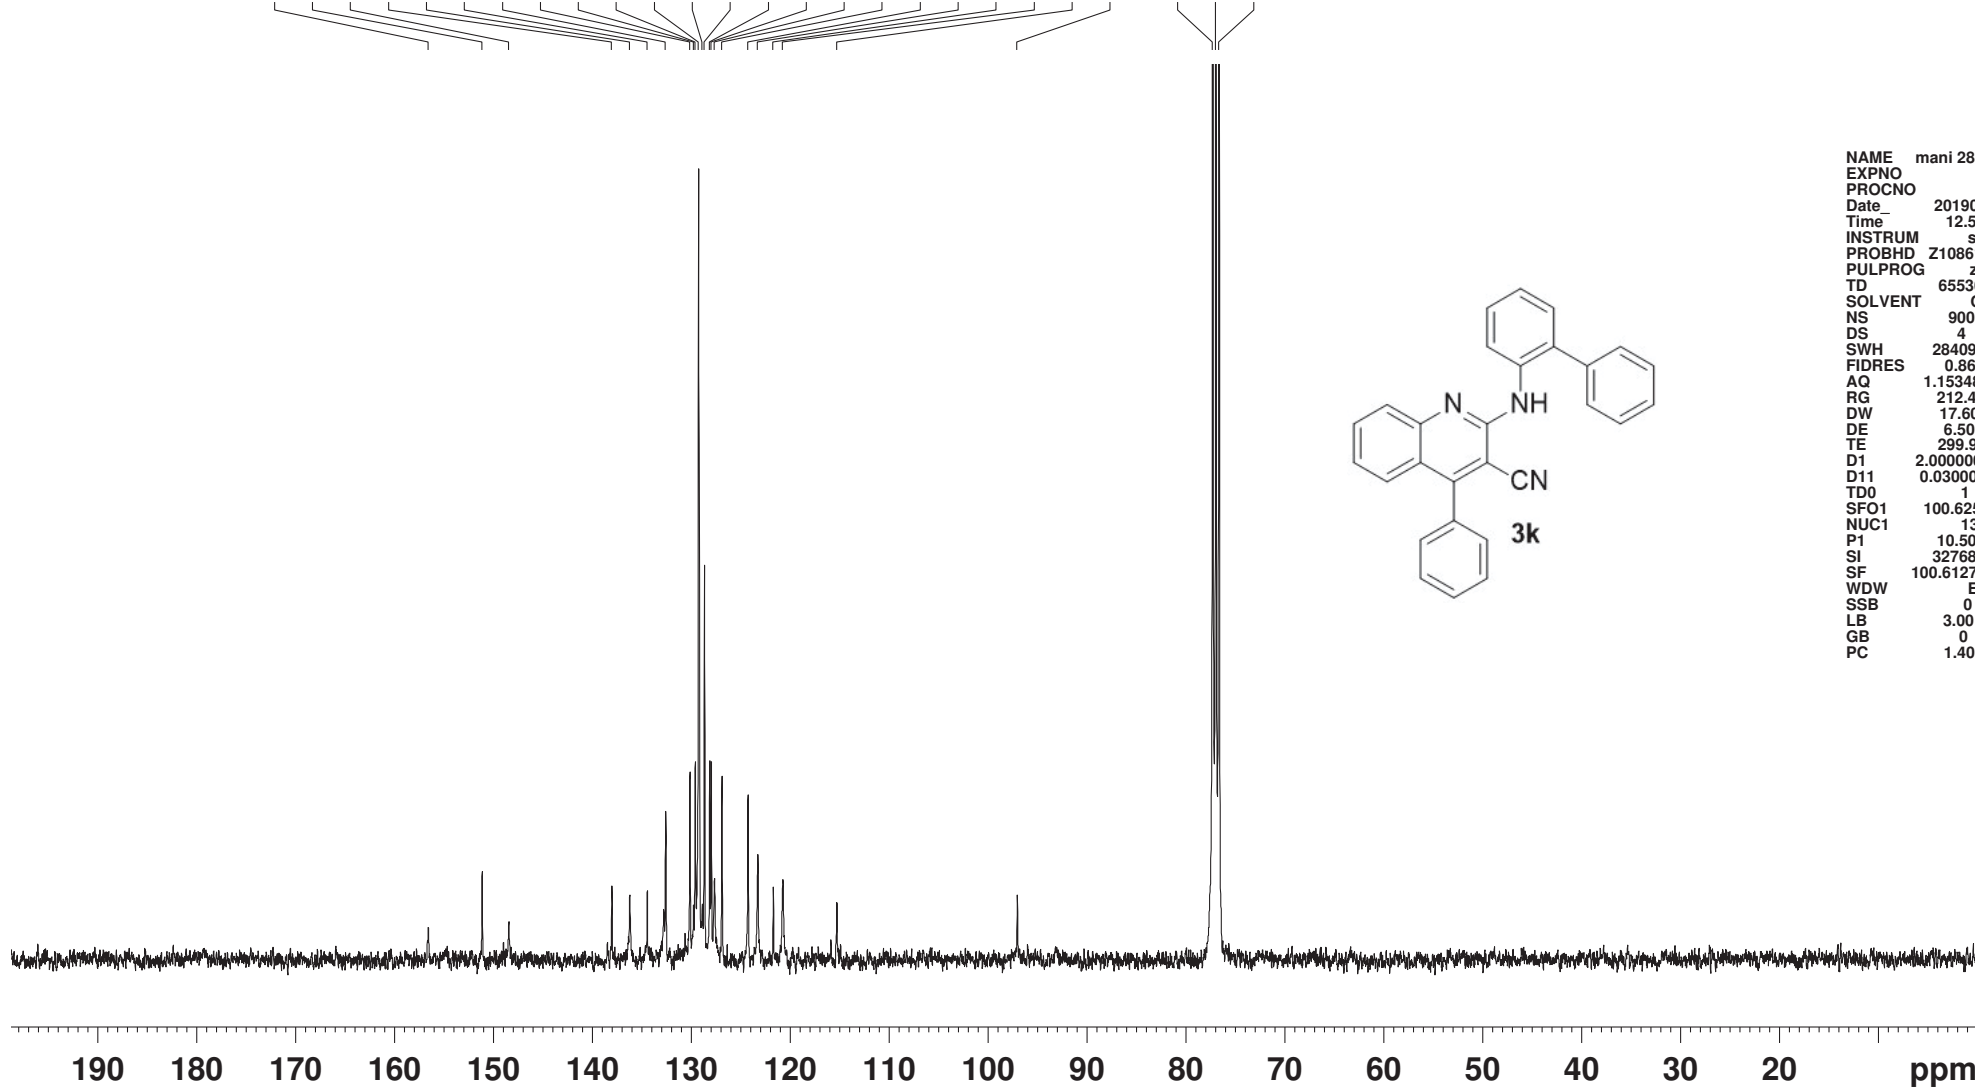

NAME mani 28-01-20  
EXPNO 2  
PROCNO 1  
Date\_ 20190128  
Time\_ 12.56 h  
INSTRUM spect  
PROBHD Z108618\_041  
PULPROG zgpg30  
TD 65536  
SOLVENT CDCl3  
NS 900  
DS 4  
SWH 28409.092 Hz  
FIDRES 0.866977 H  
AQ 1.1534836 sec  
RG 212.49  
DW 17.600 usec  
DE 6.50 usec  
TE 299.9 K  
D1 2.00000000 sec  
D11 0.03000000 se  
TD0 1  
SFO1 100.6258487 M  
NUC1 13C  
P1 10.50 usec  
SI 32768  
SF 100.6127708 MHz  
WDW EM  
SSB 0  
LB 3.00 Hz  
GB 0  
PC 1.40

4-CO<sub>2</sub>EtPD, MCN, 2-ABP, 80deg, 5h, purified pale yellow solid (midspot)

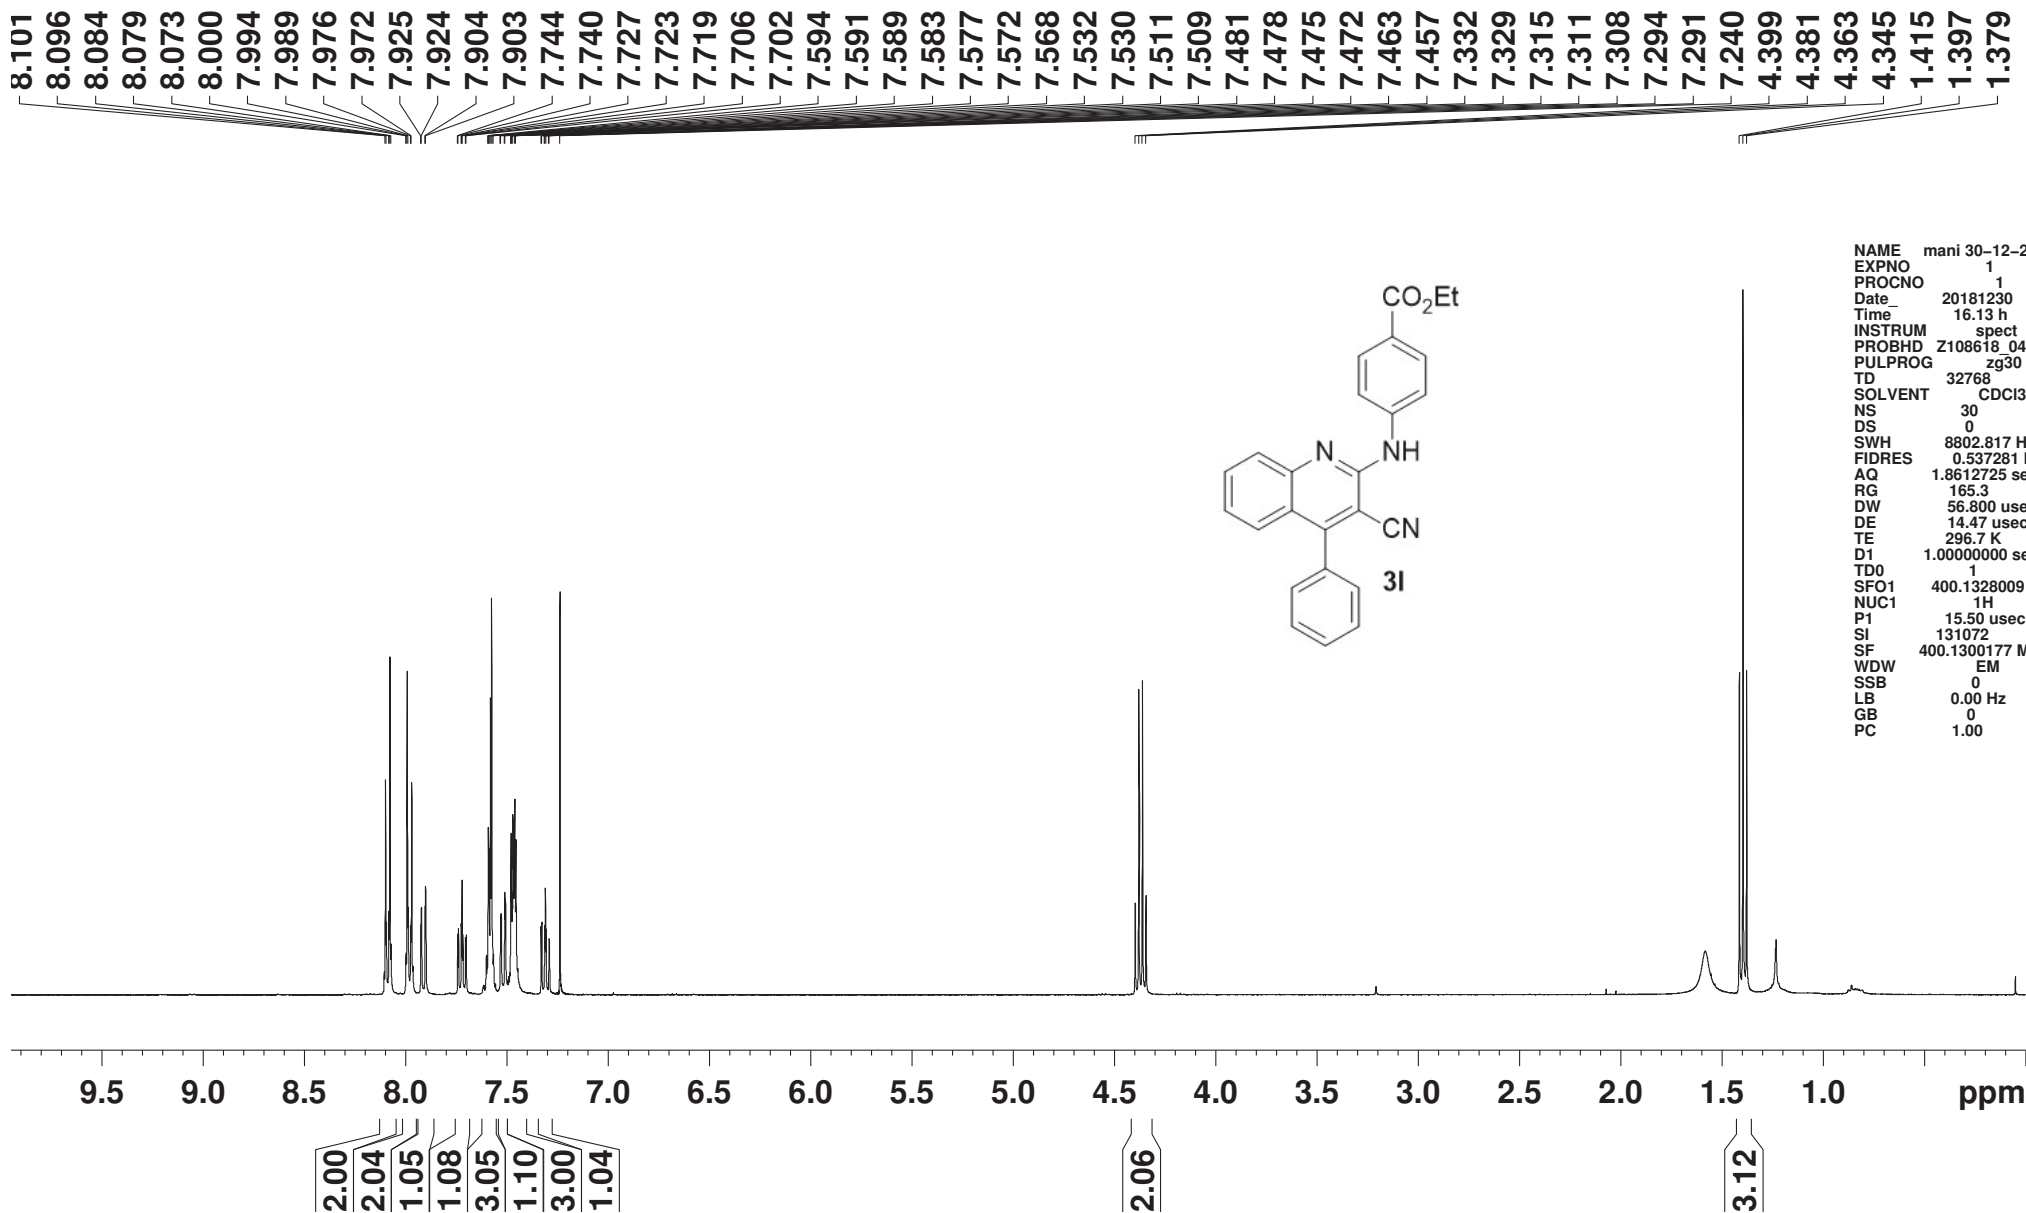

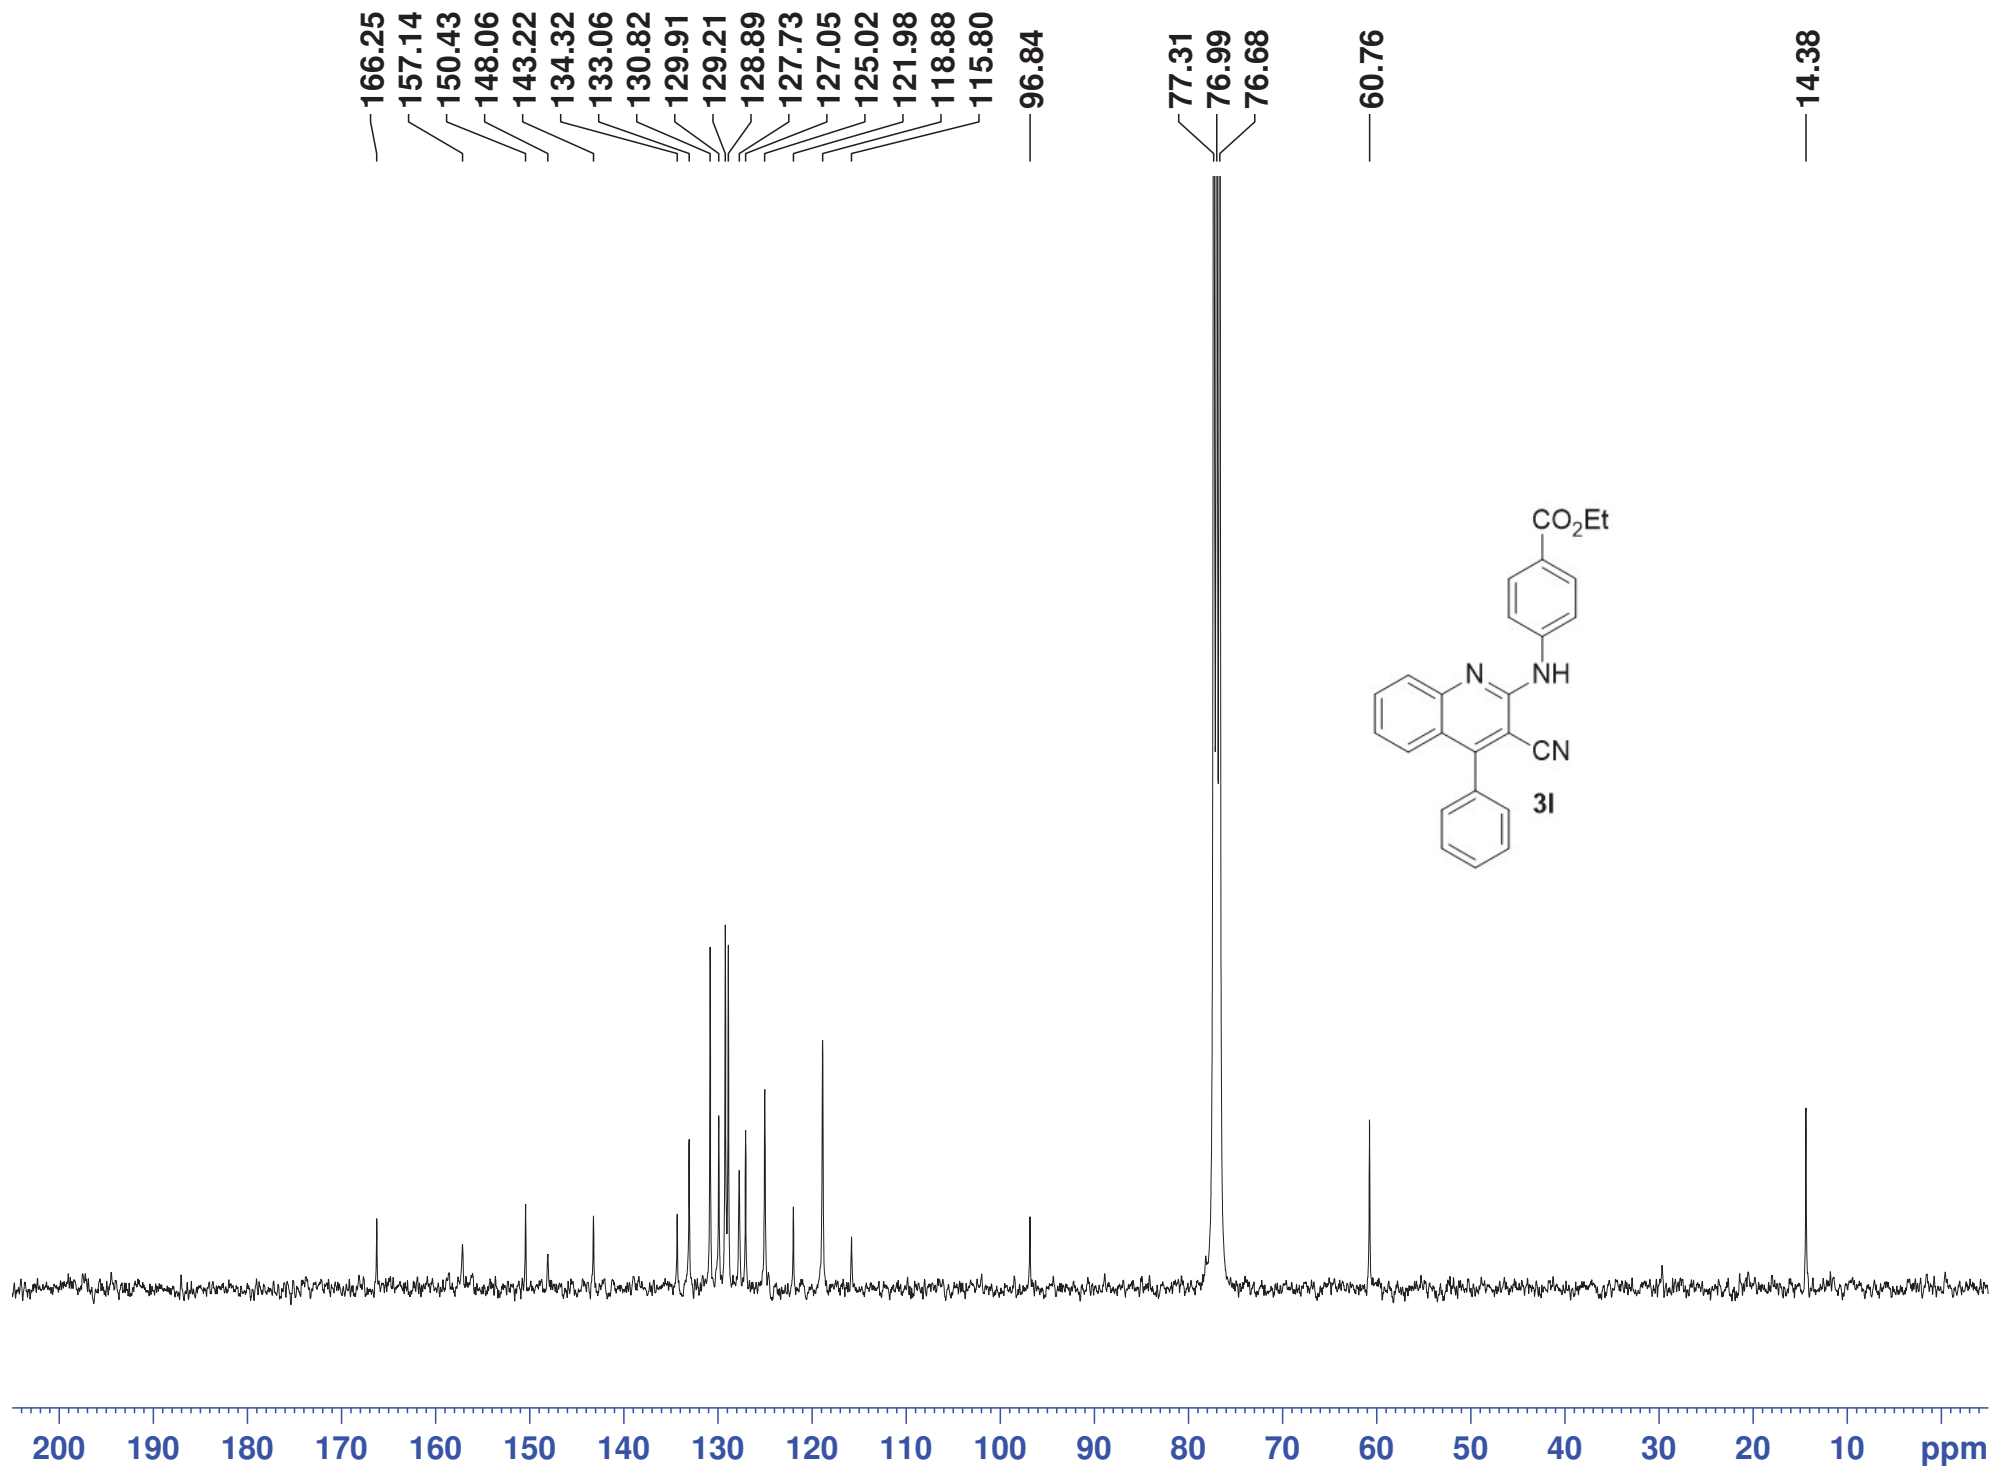

4-CO<sub>2</sub>EtPD, MCN, 2-ABP, 80deg, 5h, purified orange solid (bottom spot)

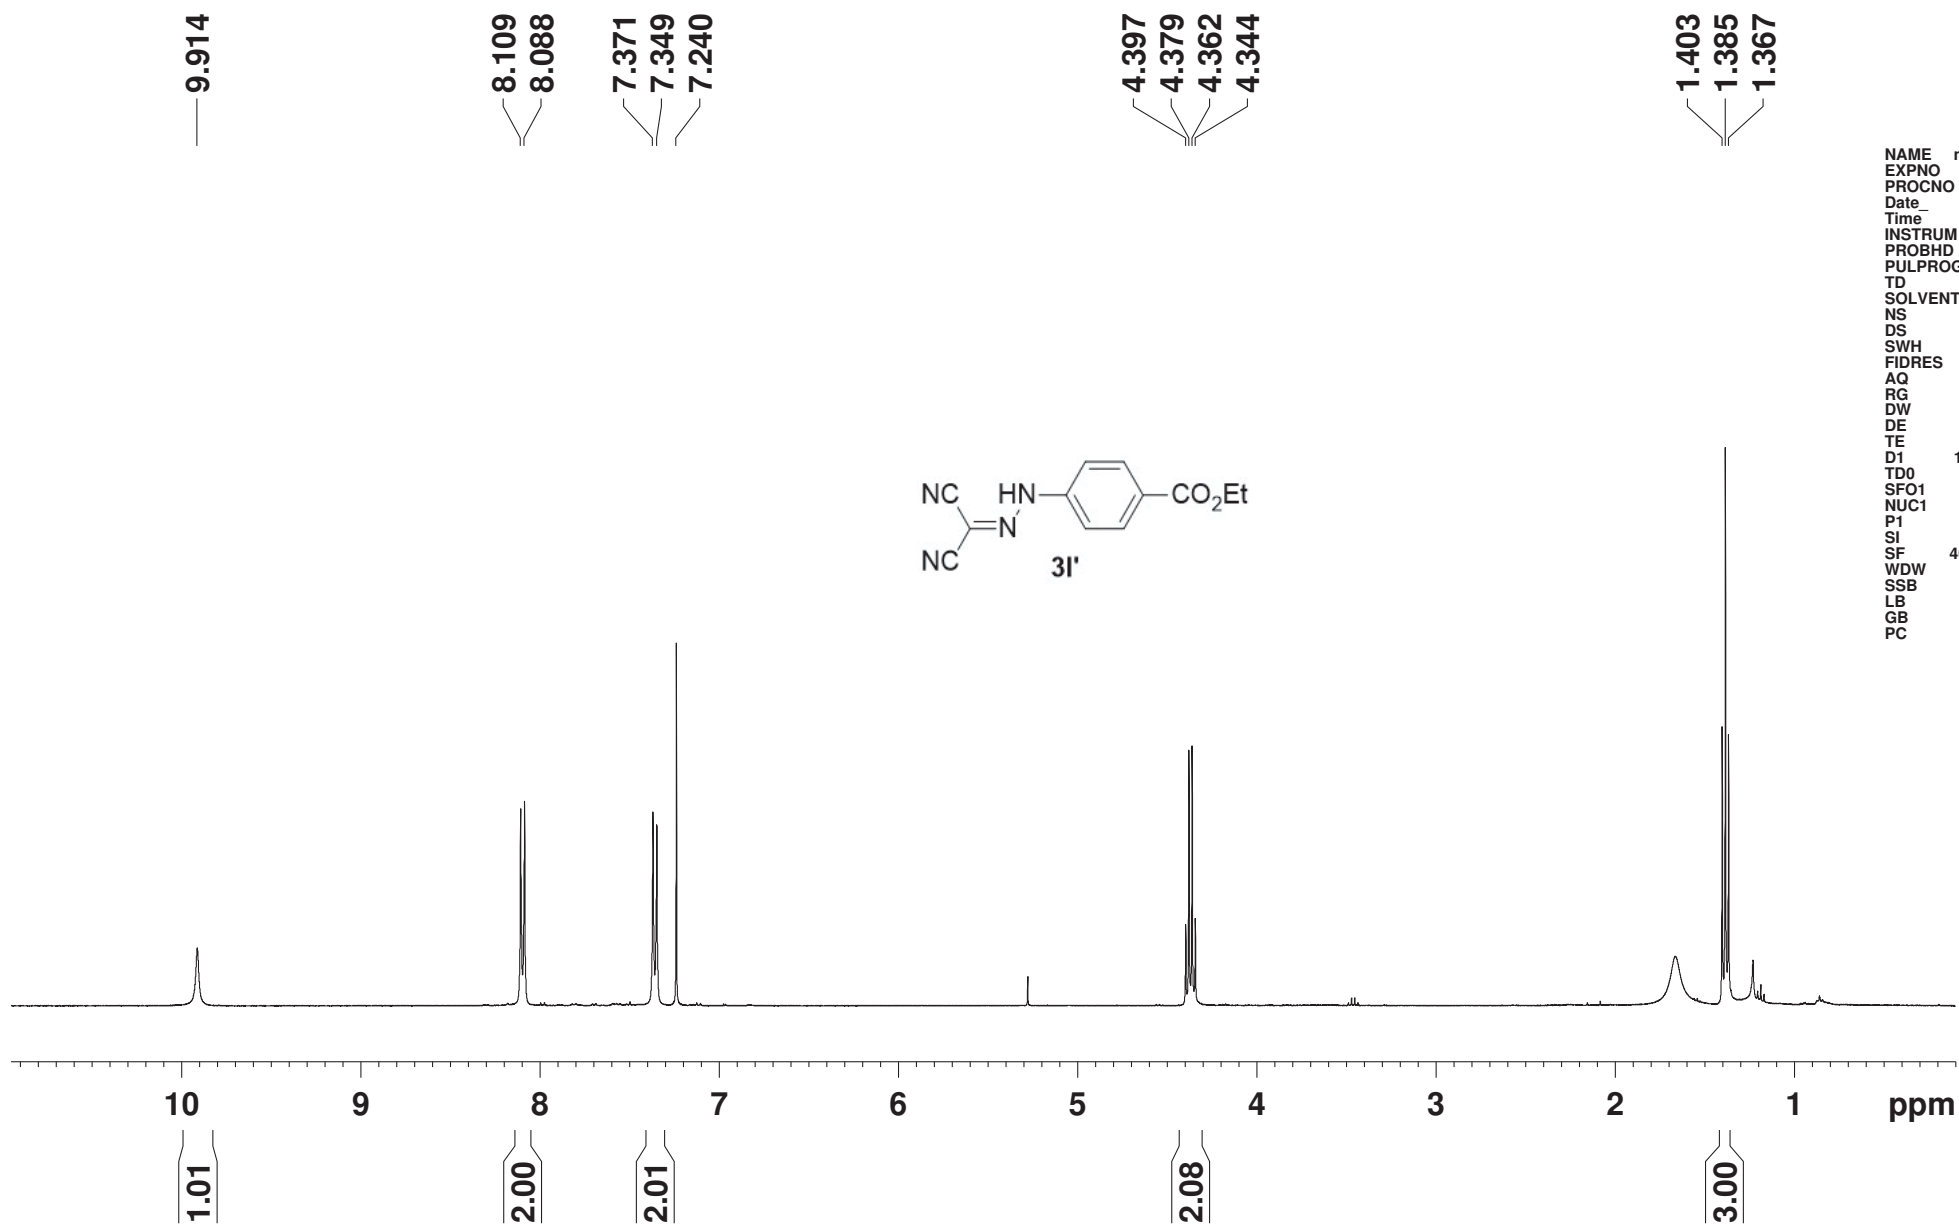

|         |           |
|---------|-----------|
| NAME    | mani 01-C |
| EXPNO   | 1         |
| PROCNO  | 1         |
| Date_   | 201901    |
| Time    | 16.28     |
| INSTRUM | spt       |
| PROBHD  | Z108618   |
| PULPROG | z1        |
| TD      | 32768     |
| SOLVENT | CC        |
| NS      | 30        |
| DS      | 0         |
| SWH     | 8802.8    |
| FIDRES  | 0.5372    |
| AQ      | 1.861272  |
| RG      | 212.49    |
| DW      | 56.800    |
| DE      | 14.47     |
| TE      | 296.7     |
| D1      | 1.0000000 |
| TD0     | 1         |
| SFO1    | 400.1328  |
| NUC1    | 1H        |
| P1      | 15.50     |
| SI      | 131072    |
| SF      | 400.13001 |
| WDW     | EM        |
| SSB     | 0         |
| LB      | 0.00      |
| GB      | 0         |
| PC      | 1.00      |

4-CO<sub>2</sub>EtPD, MCN, 2-ABP, 80deg, 5h, purified orange solid

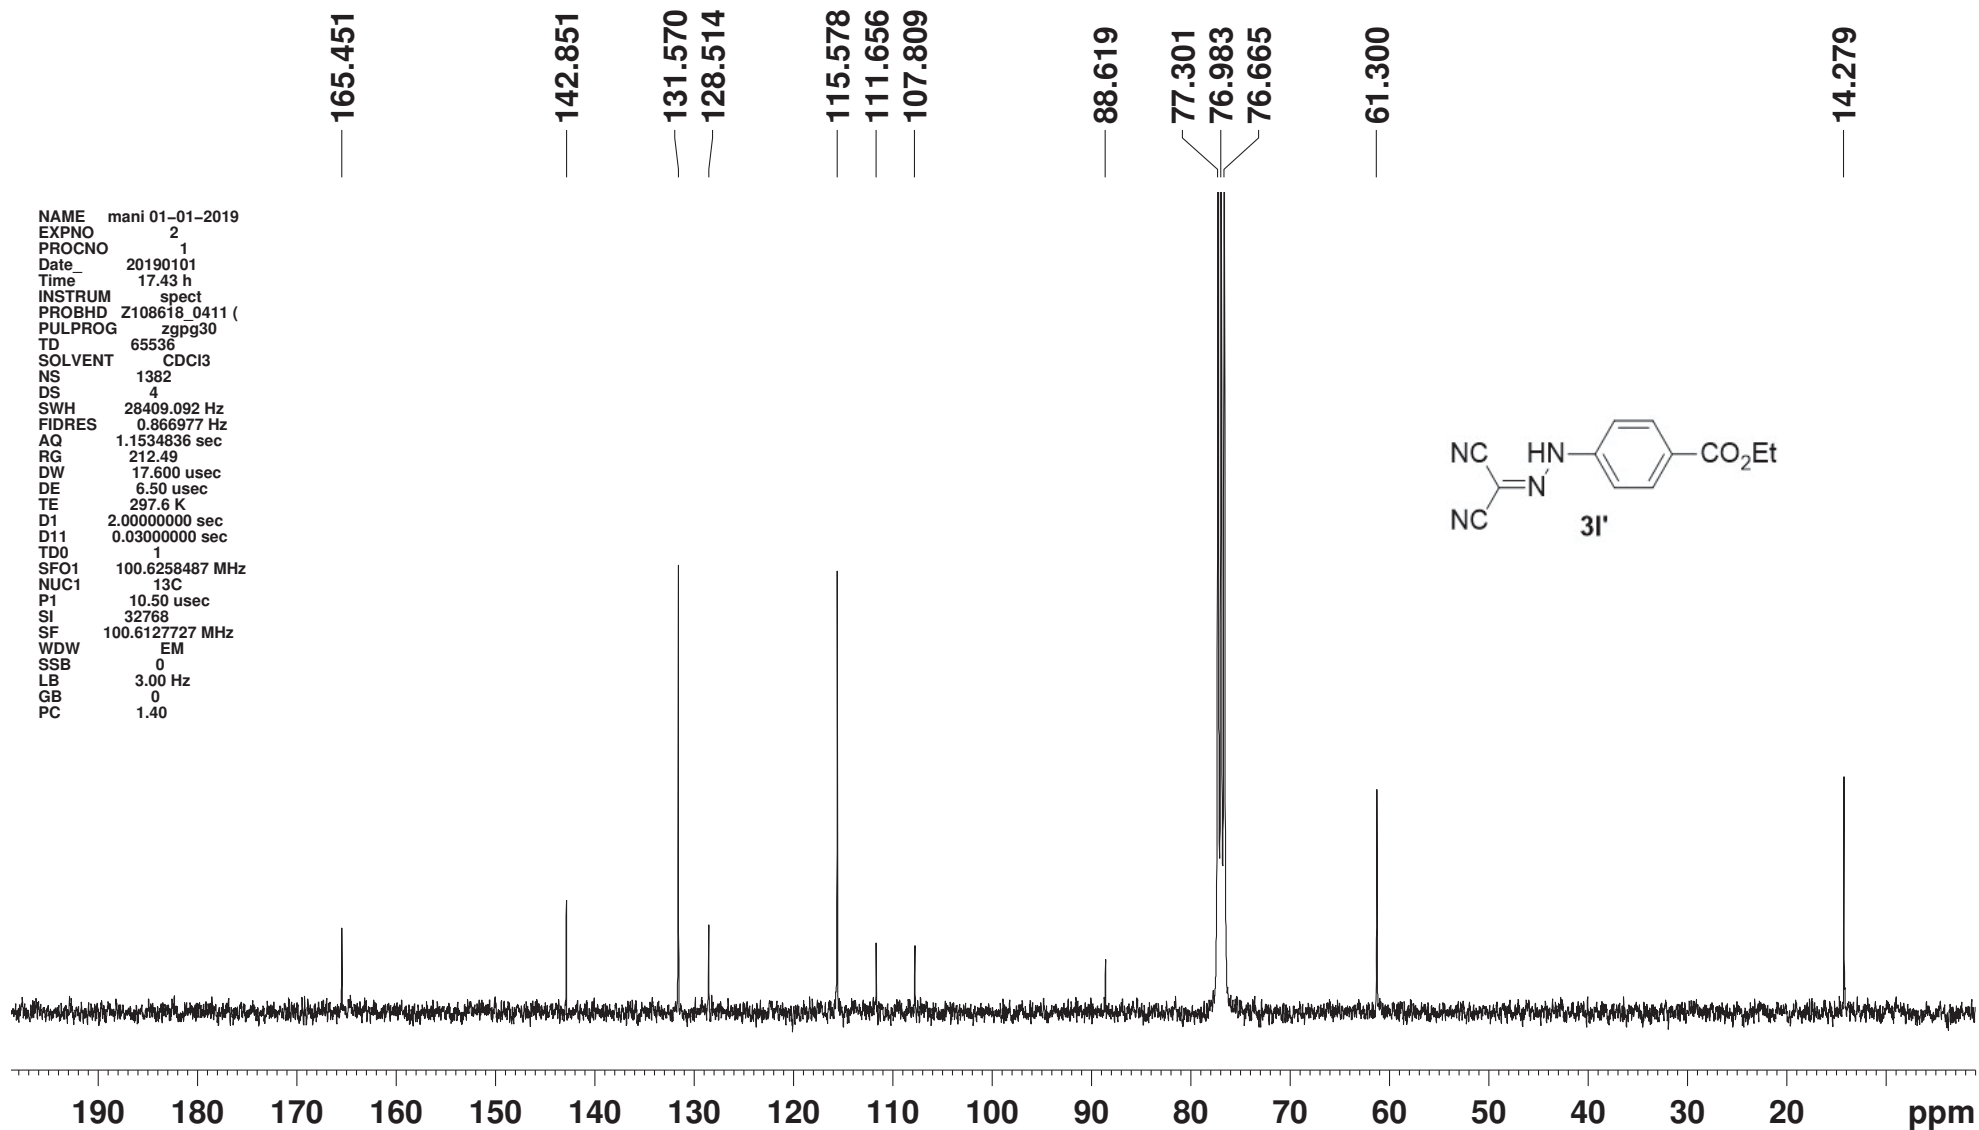



— 9.918

7.315  
7.309  
7.303  
7.298  
7.292  
7.281  
7.240  
7.140  
7.120  
7.098

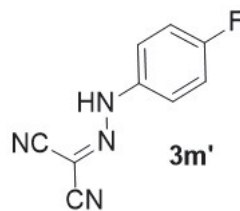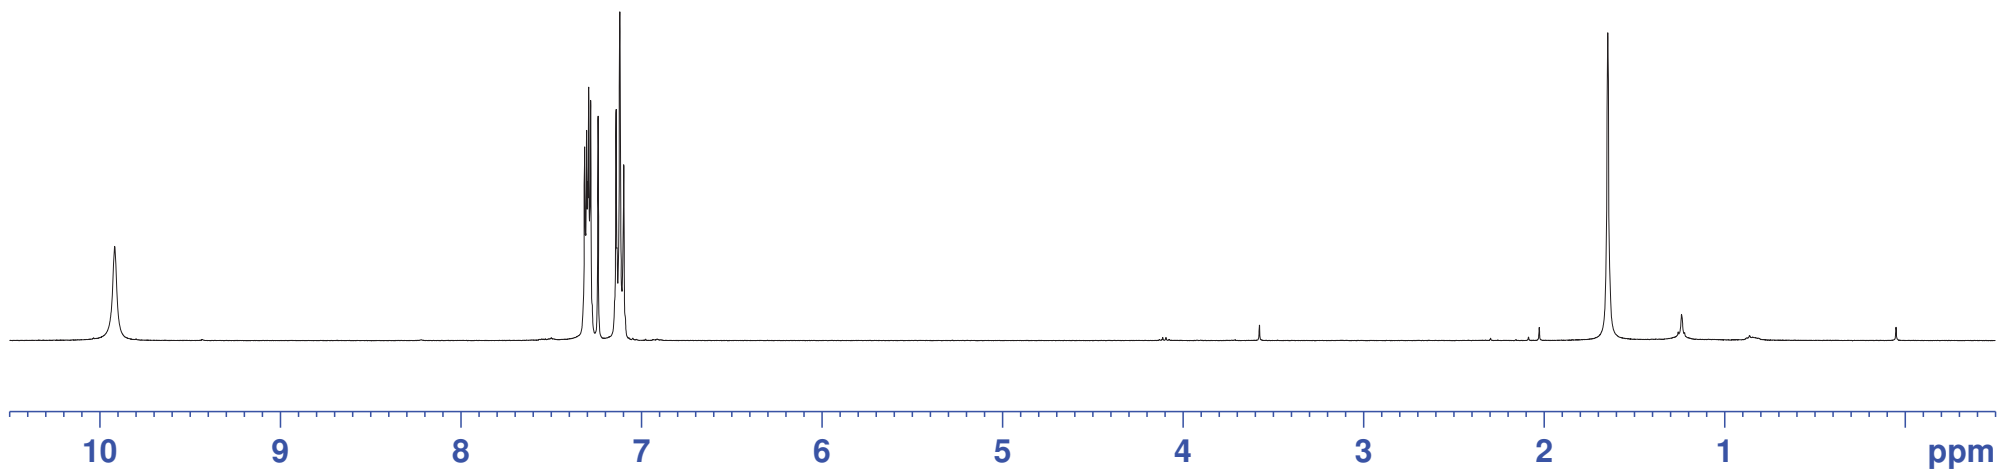

1.00

2.01  
1.99

S32

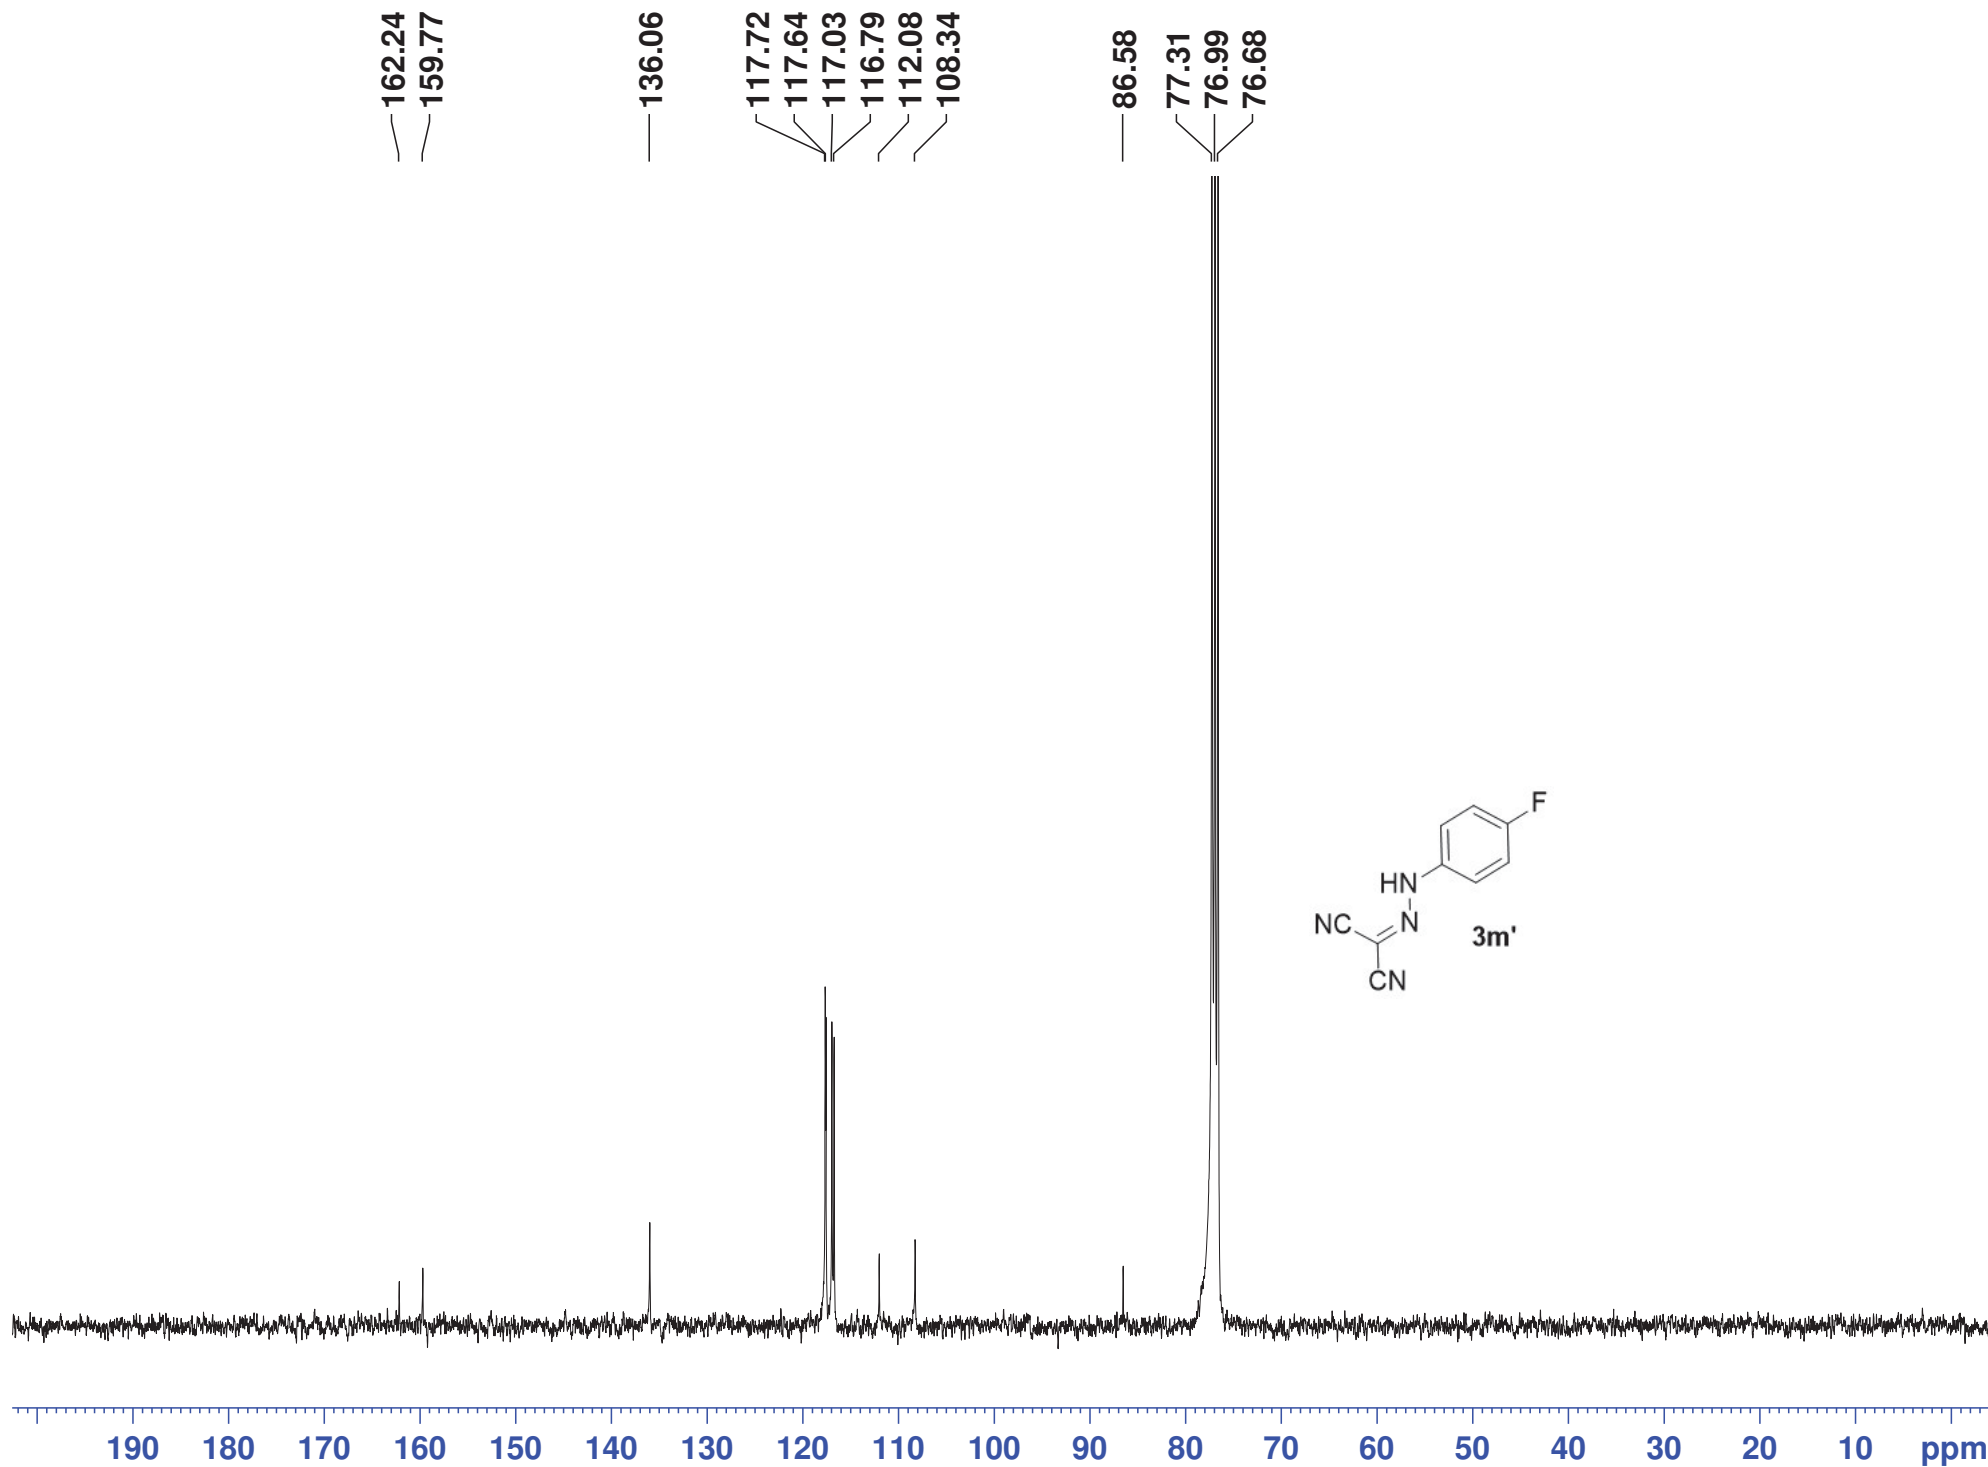

PD, 5-ClABP, MCN, 80deg, 5h, purified pale yellow solid

7.835  
7.816  
7.802  
7.780  
7.605  
7.597  
7.591  
7.582  
7.465  
7.456  
7.447  
7.441  
7.435  
7.429  
7.422  
7.403  
7.383  
7.293  
7.239  
7.162  
7.144  
7.125

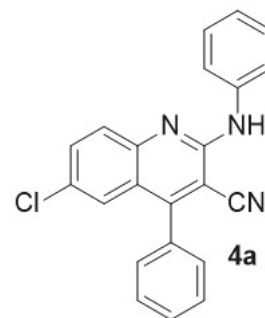

NAME mani 15-01-2019  
EXPNO 2  
PROCNO 1  
Date\_ 20190115  
Time 19.29  
INSTRUM spect  
PROBHD 5 mm PABBO BB-  
PULPROG zg30  
TD 32768  
SOLVENT CDCl3  
NS 30  
DS 0  
SWH 8223.685 Hz  
FIDRES 0.250967 Hz  
AQ 1.9923444 sec  
RG 256  
DW 60.800 usec  
DE 6.50 usec  
TE 298.3 K  
D1 1.00000000 sec  
TD0 1

===== CHANNEL f1 =====  
NUC1 1H  
P1 14.50 usec  
PL1 0.00 dB  
PL1W 10.67551708 W  
SFO1 400.1528010 MHz  
SI 32768  
SF 400.1500168 MHz  
WDW EM  
SSB 0  
LB 0.30 Hz  
GB 0  
PC 1.00

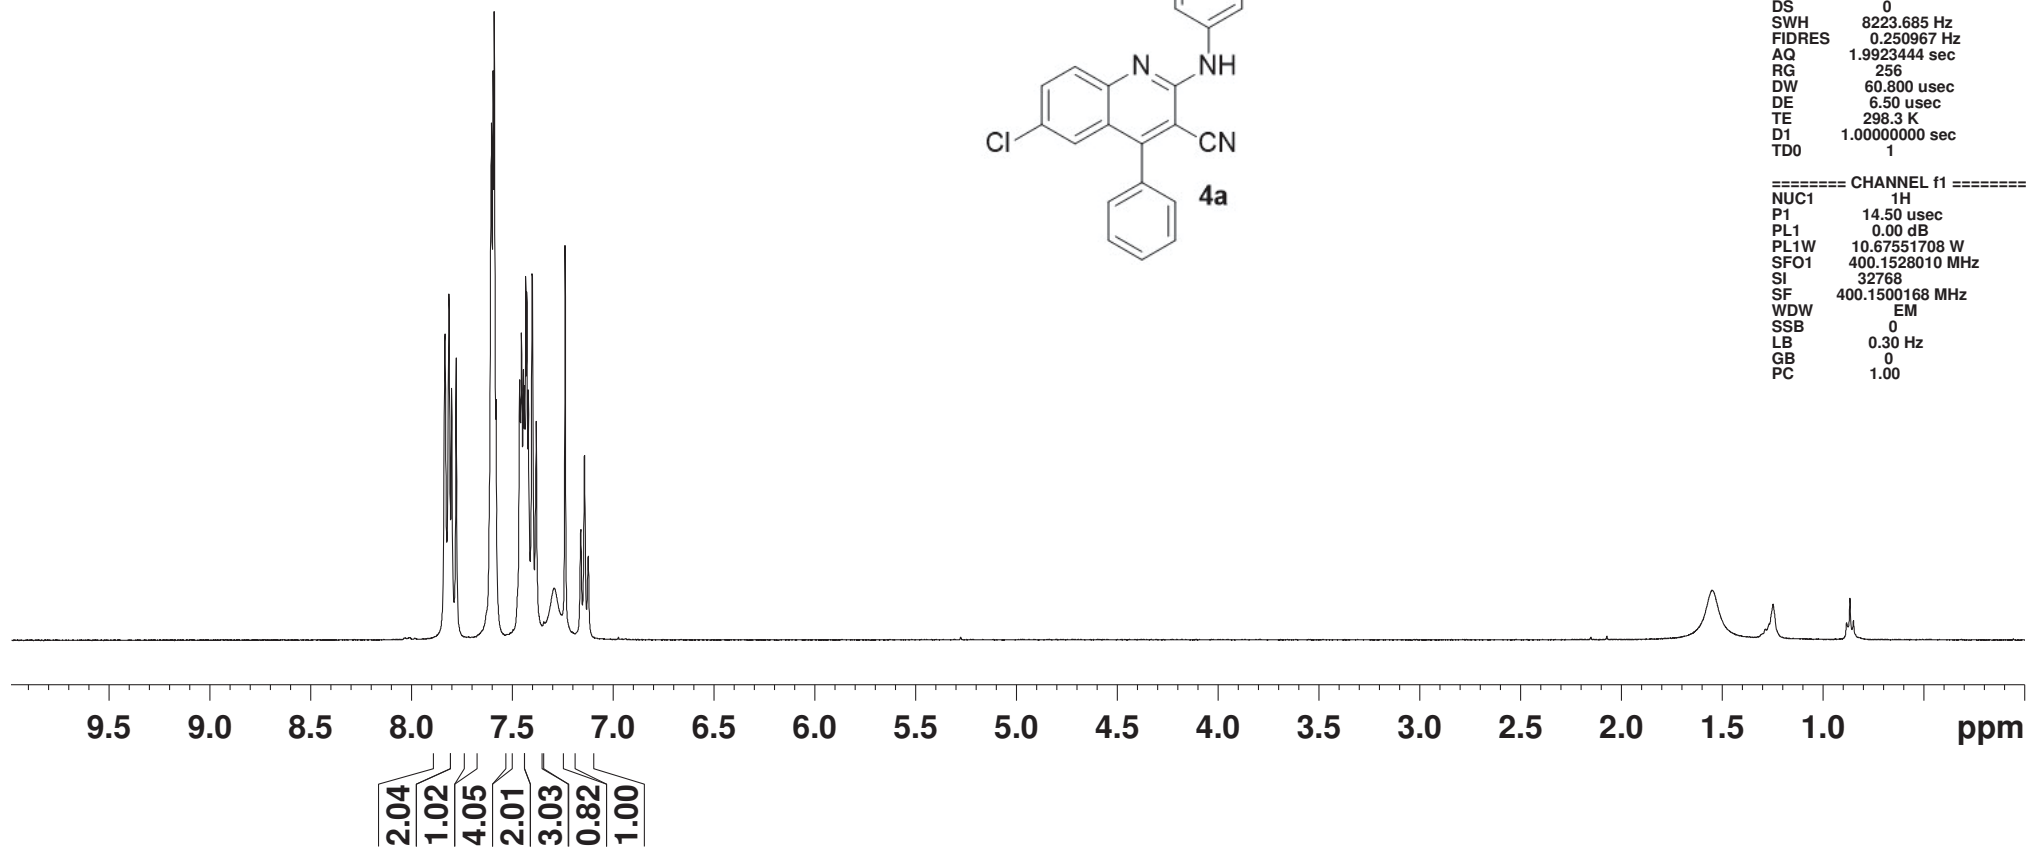

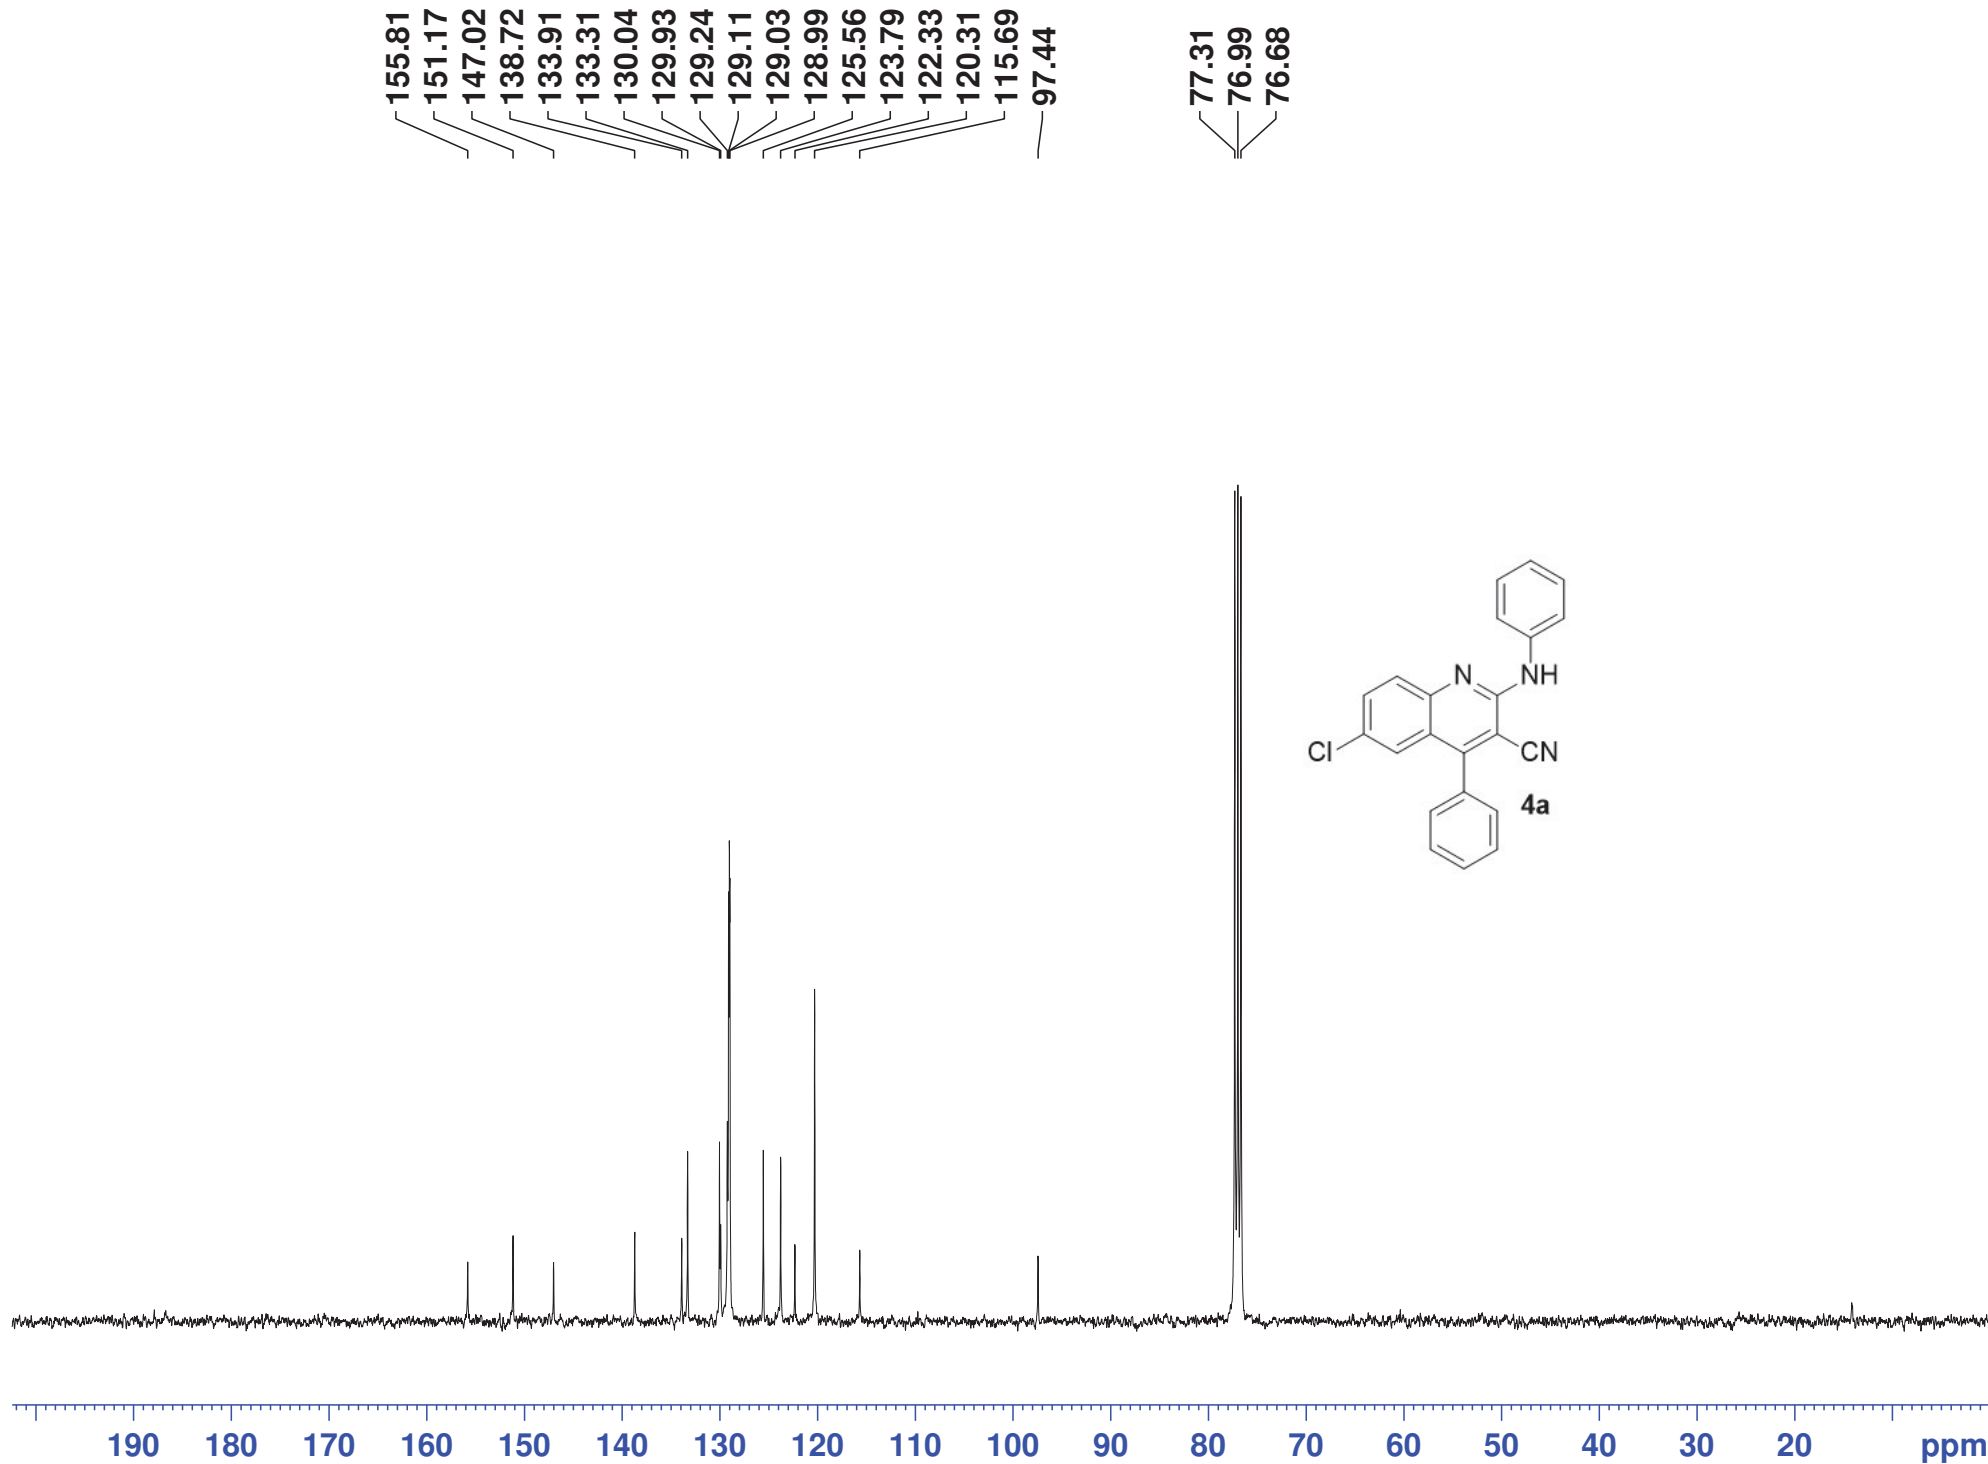

7.837  
7.818  
7.719  
7.715  
7.616  
7.614  
7.608  
7.603  
7.598  
7.592  
7.589  
7.585  
7.464  
7.459  
7.455  
7.452  
7.446  
7.440  
7.421  
7.416  
7.402  
7.386  
7.381  
7.281  
7.239  
7.161  
7.143  
7.124

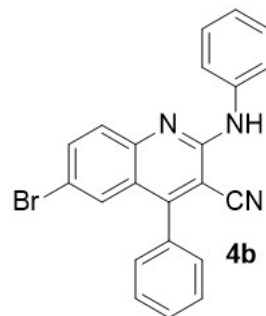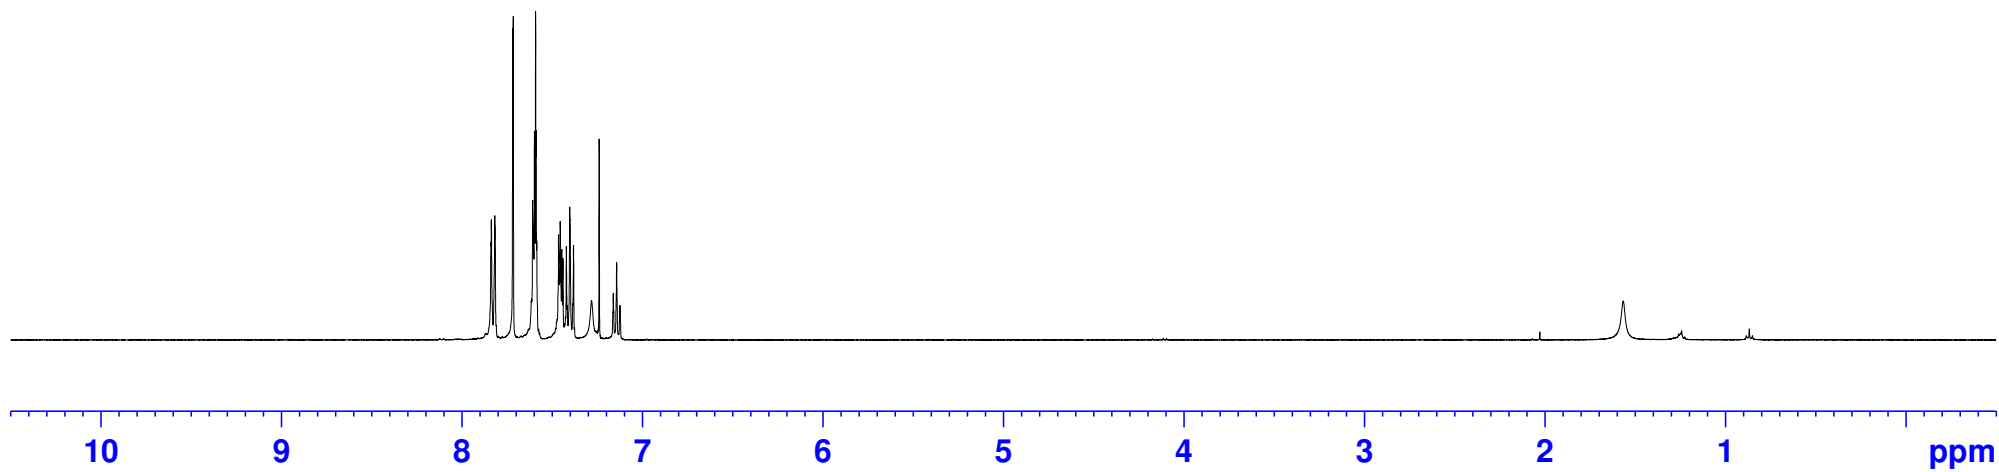

2.01  
1.99  
4.02  
2.04  
2.03  
1.01  
1.00

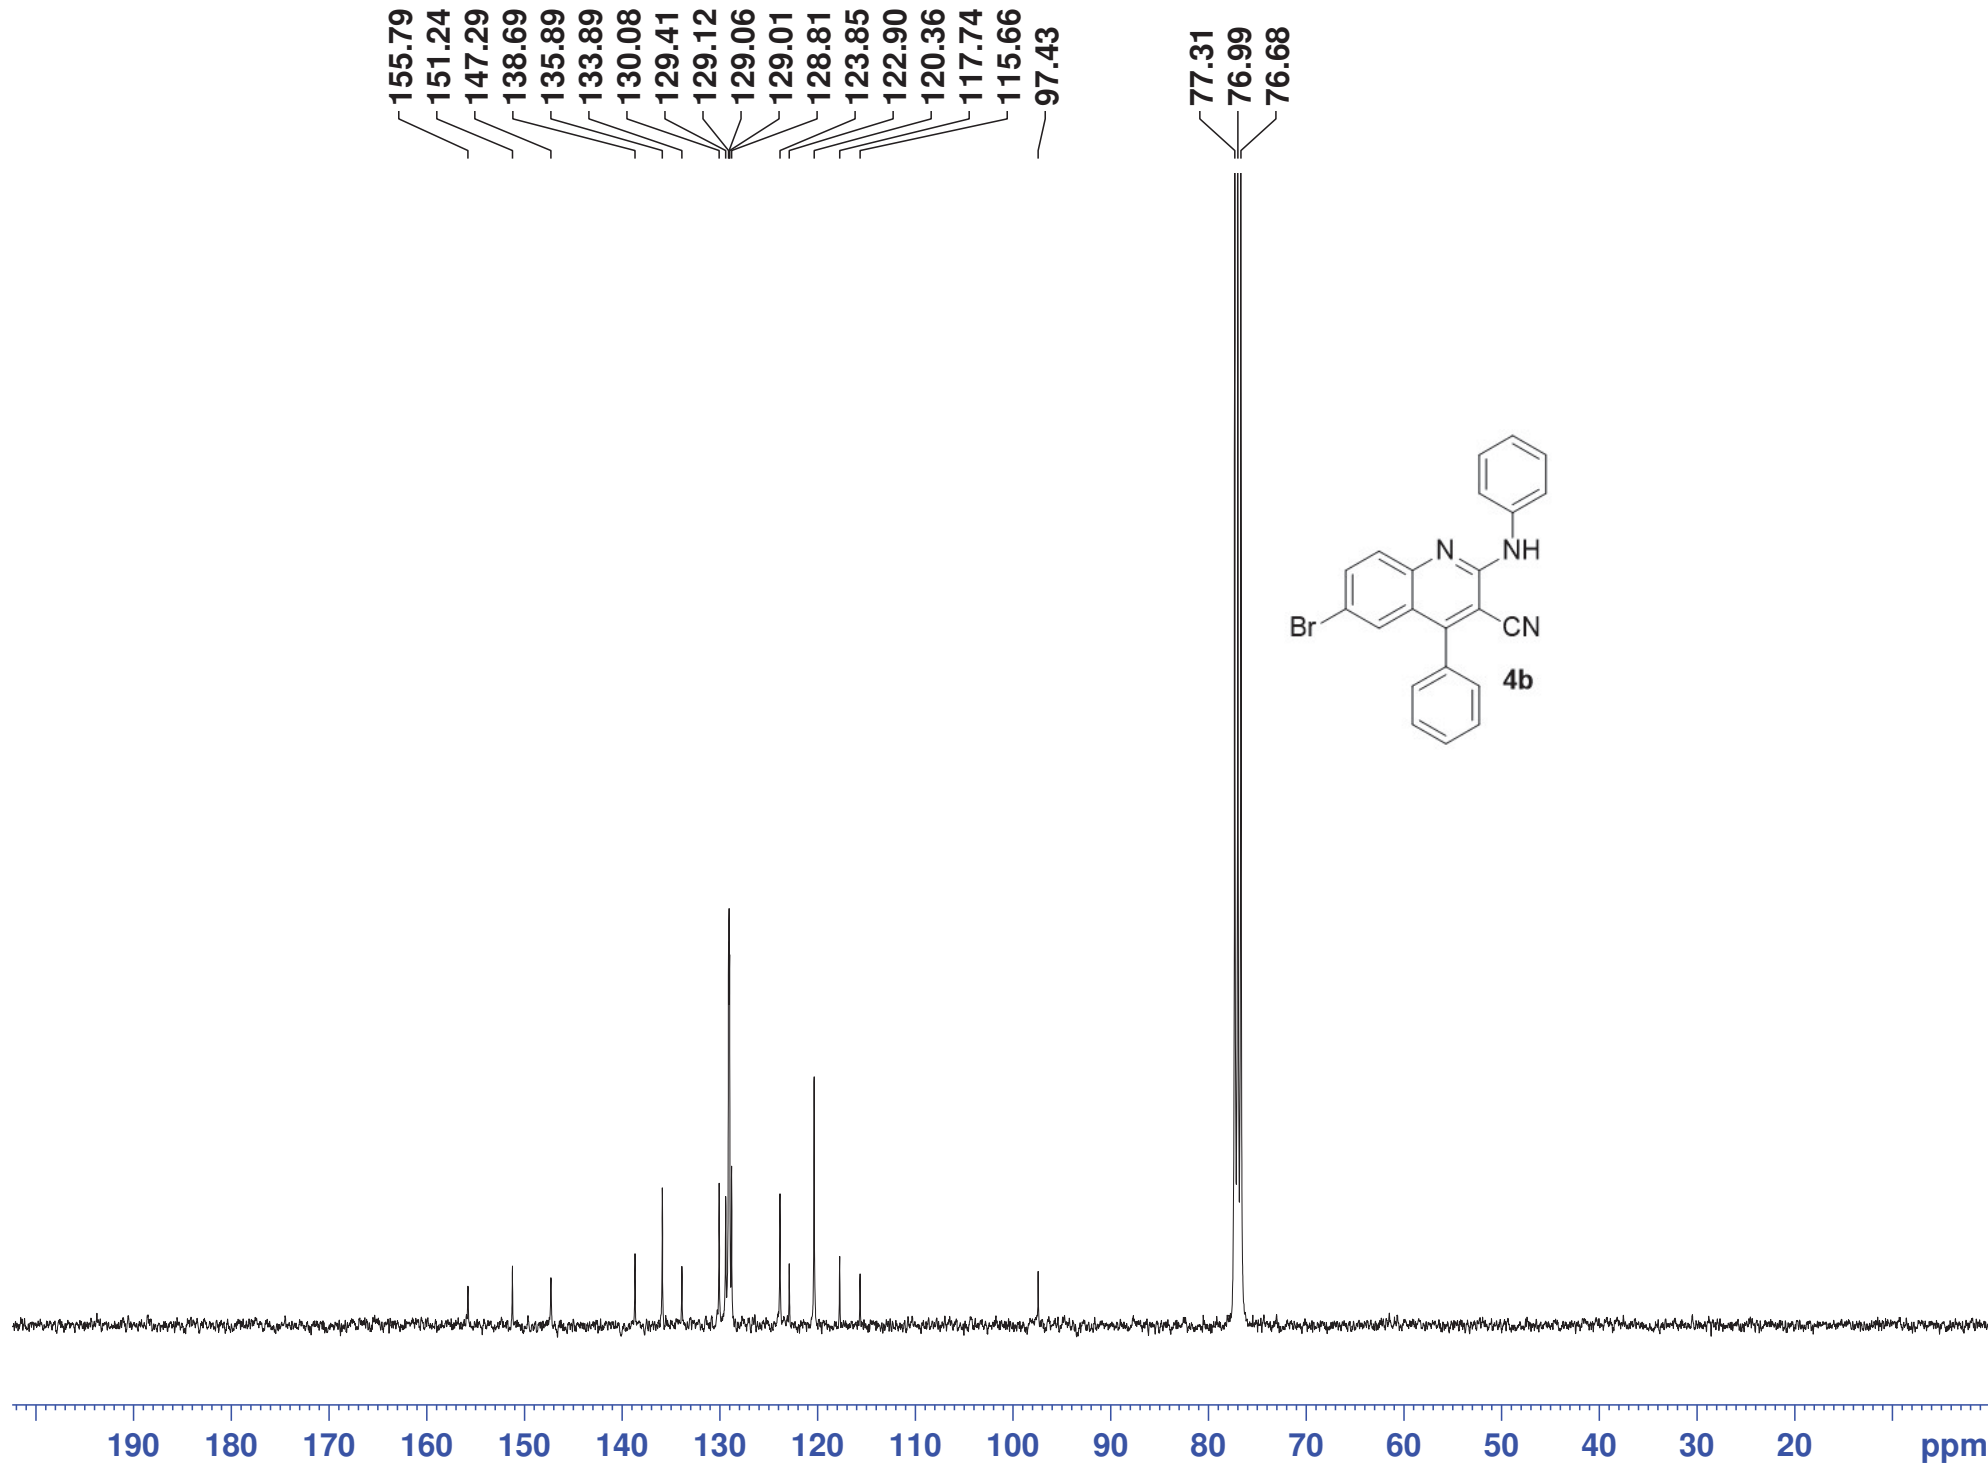

PD, 4'-Me2-ABP, MCN, 80deg, 5h, purified pale yellow solid

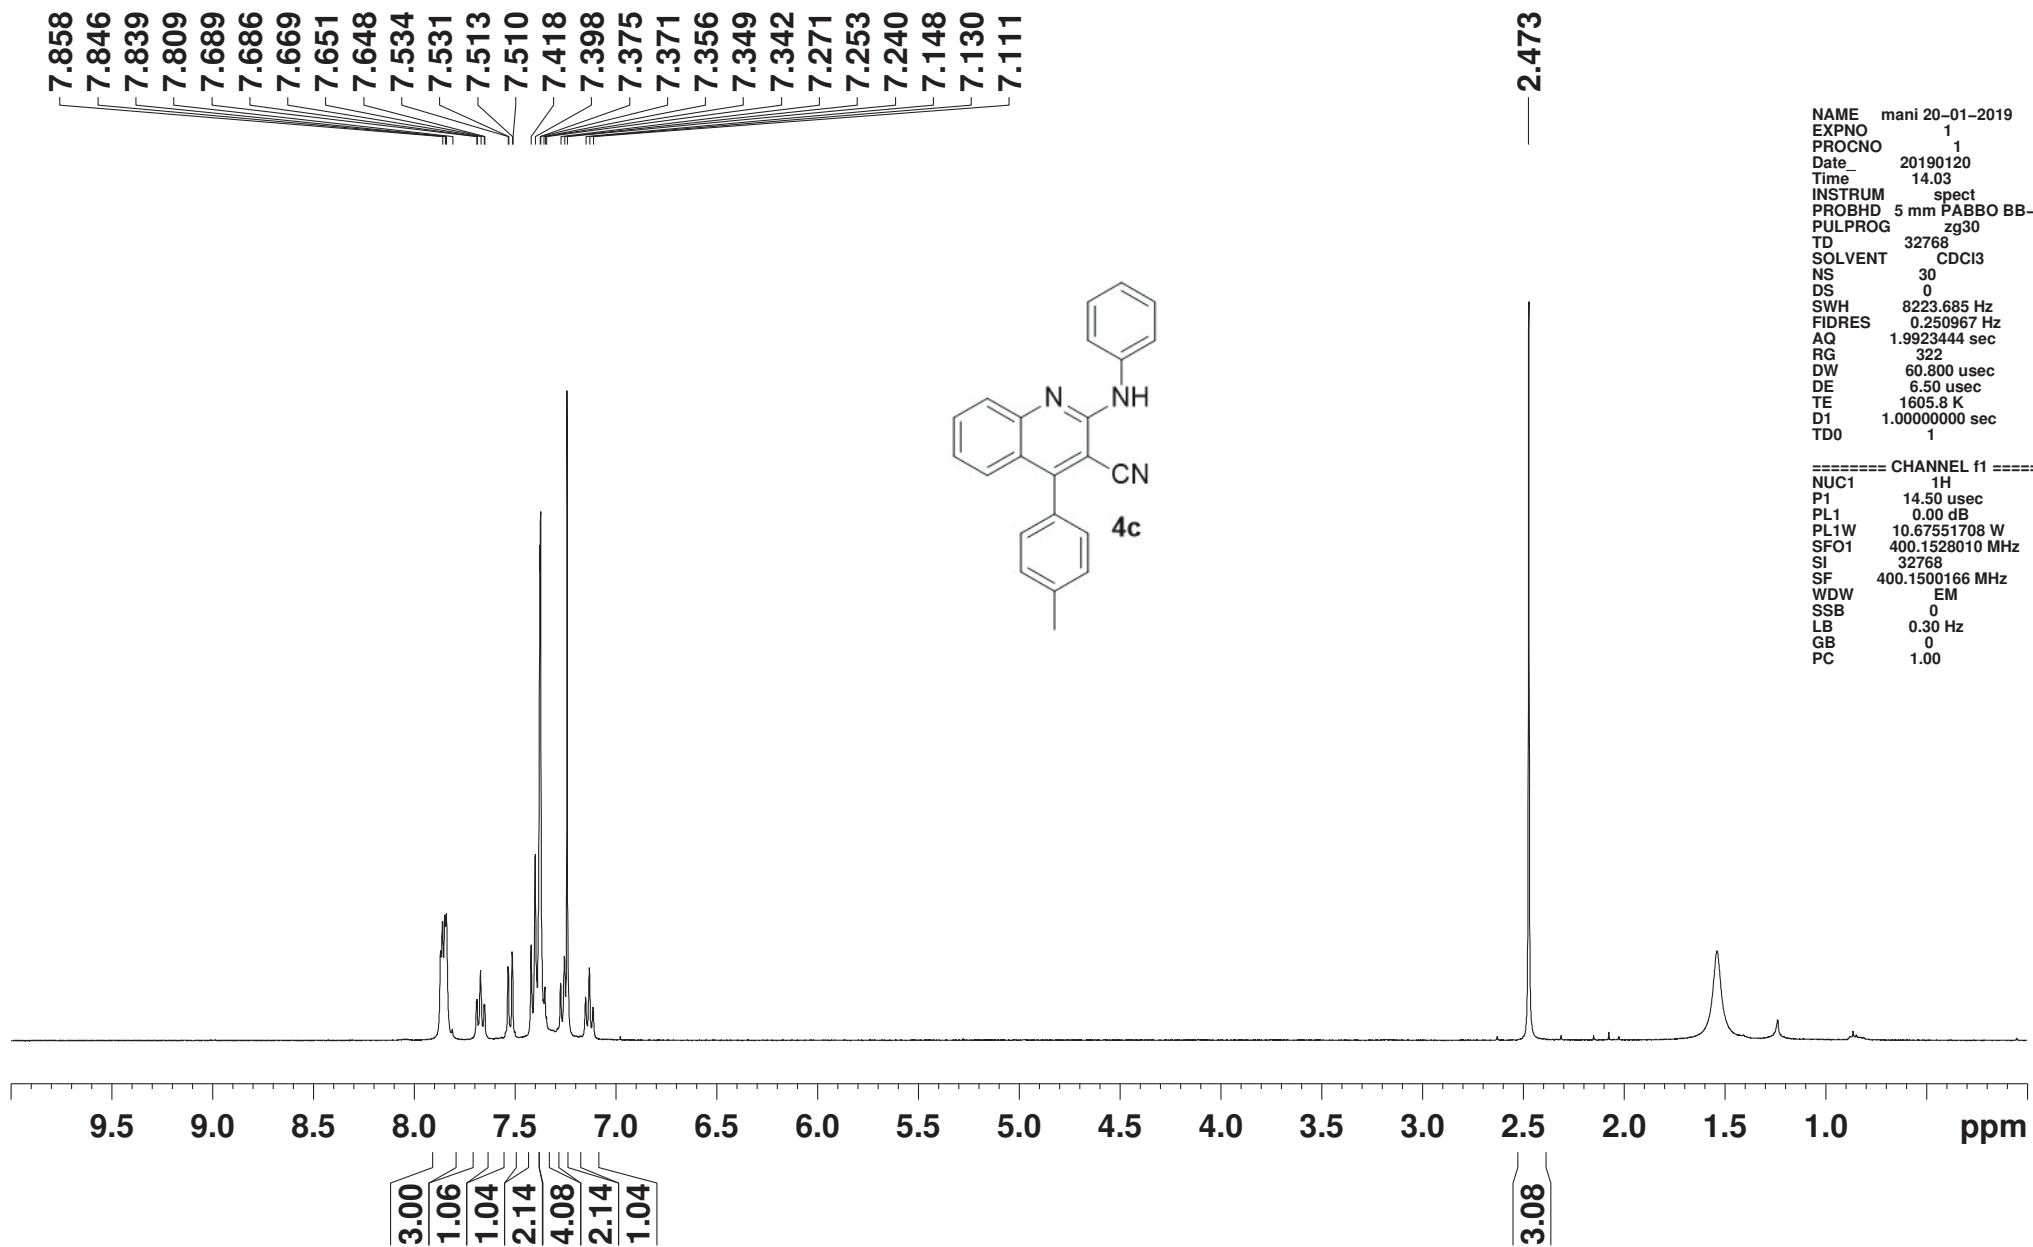

PD, 4'-MeABP, MCN, 80deg, 5h, pale yellow solid

NAME mani 31-01-2019  
EXPNO 5  
PROCNO 1  
Date\_ 20190131  
Time 19.06 h  
NSTRUM spect  
PROBHD Z108618\_0411 (  
PULPROG zgpg30  
ID 65536  
SOLVENT CDCl3  
NS 276  
DS 4  
SWH 28409.092 Hz  
FIDRES 0.866977 Hz  
AQ 1.1534836 sec  
RG 212.49  
JW 17.600 usec  
JE 6.50 usec  
TE 299.7 K  
D1 2.00000000 sec  
D11 0.03000000 sec  
FO1 100.6258487 MHz  
UC1 13C  
P1 10.50 usec  
PI 32768  
PF 100.6127730 MHz  
NDW EM  
SBS 0  
B 3.00 Hz  
B 0  
C 1.40

156.949  
151.090  
148.562  
139.855  
139.108  
132.629  
131.604  
129.504  
129.191  
128.952  
127.716  
127.014  
124.246  
123.447  
121.854  
120.123  
116.275  
96.534

77.309  
76.991  
76.674

21.430

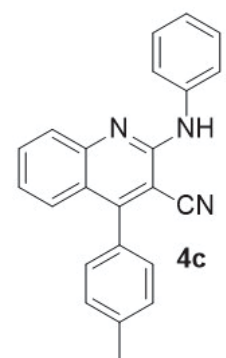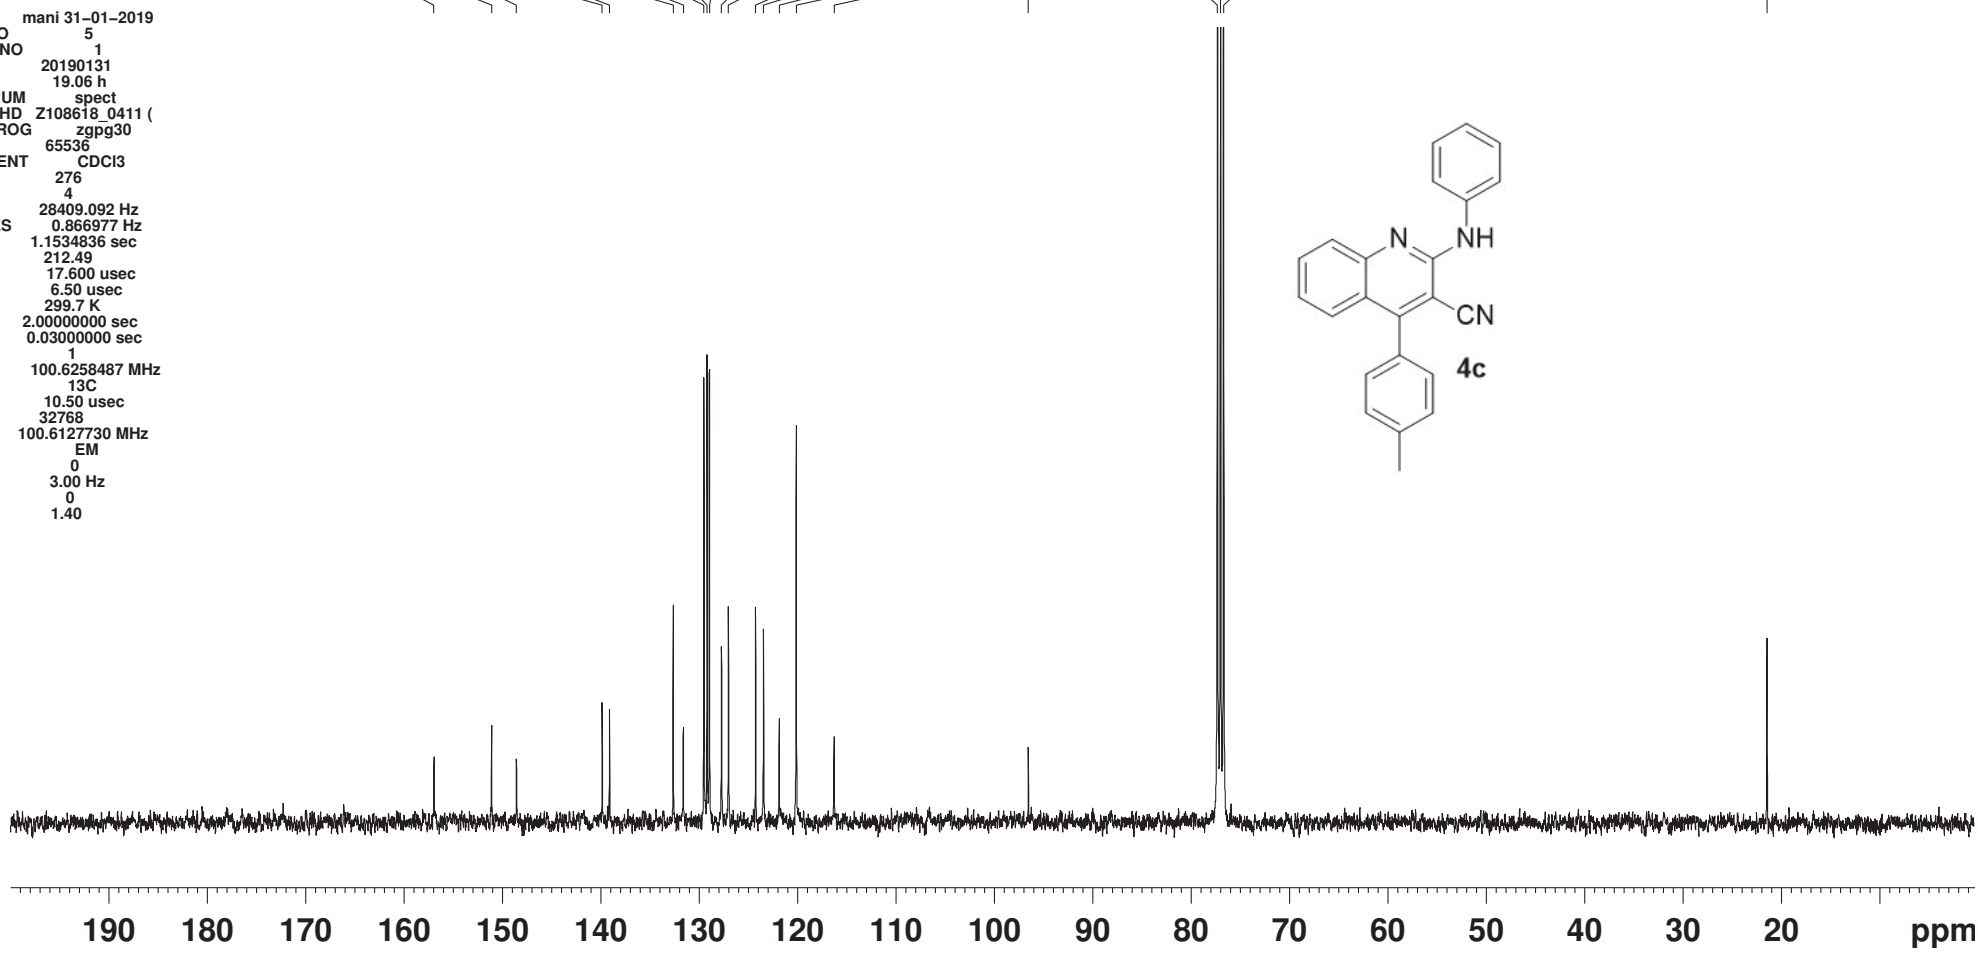



3OMePD, 4'MeABP, MCN, 80deg, 5h, purified pale yellow solid

7.650  
7.646  
7.538  
7.537  
7.535  
7.533  
7.517  
7.516  
7.514  
7.398  
7.383  
7.376  
7.372  
7.365  
7.358  
7.353  
7.351  
7.289  
7.286  
7.280  
7.275  
7.273  
7.258  
7.255  
7.252  
7.240  
7.238  
7.234  
6.709  
6.702  
6.697  
6.691  
6.689  
6.680  
6.674  
6.668  
6.663  
6.657  
3.868  
2.476

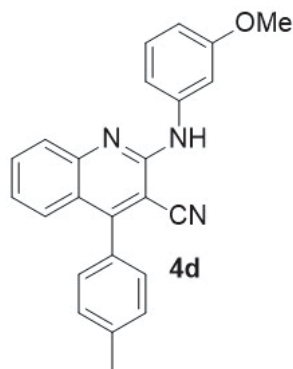

NAME mani 25-01-2019  
EXPNO 4  
PROCNO 1  
Date\_ 20190125  
Time 22.26 h  
INSTRUM spect  
PROBHD Z108618\_0411 (  
PULPROG zg30  
TD 32768  
SOLVENT CDCl3  
NS 21  
DS 0  
SWH 8802.817 Hz  
FIDRES 0.537281 Hz  
AQ 1.8612725 sec  
RG 118.08  
DW 56.800 usec  
DE 14.47 usec  
TE 298.9 K  
D1 1.00000000 sec  
TD0 1  
SFO1 400.1328009 MHz  
NUC1 1H  
P1 15.50 usec  
SI 131072  
SF 400.1300177 MHz  
WDW EM  
SSB 0  
LB 0.00 Hz  
GB 0  
PC 1.00

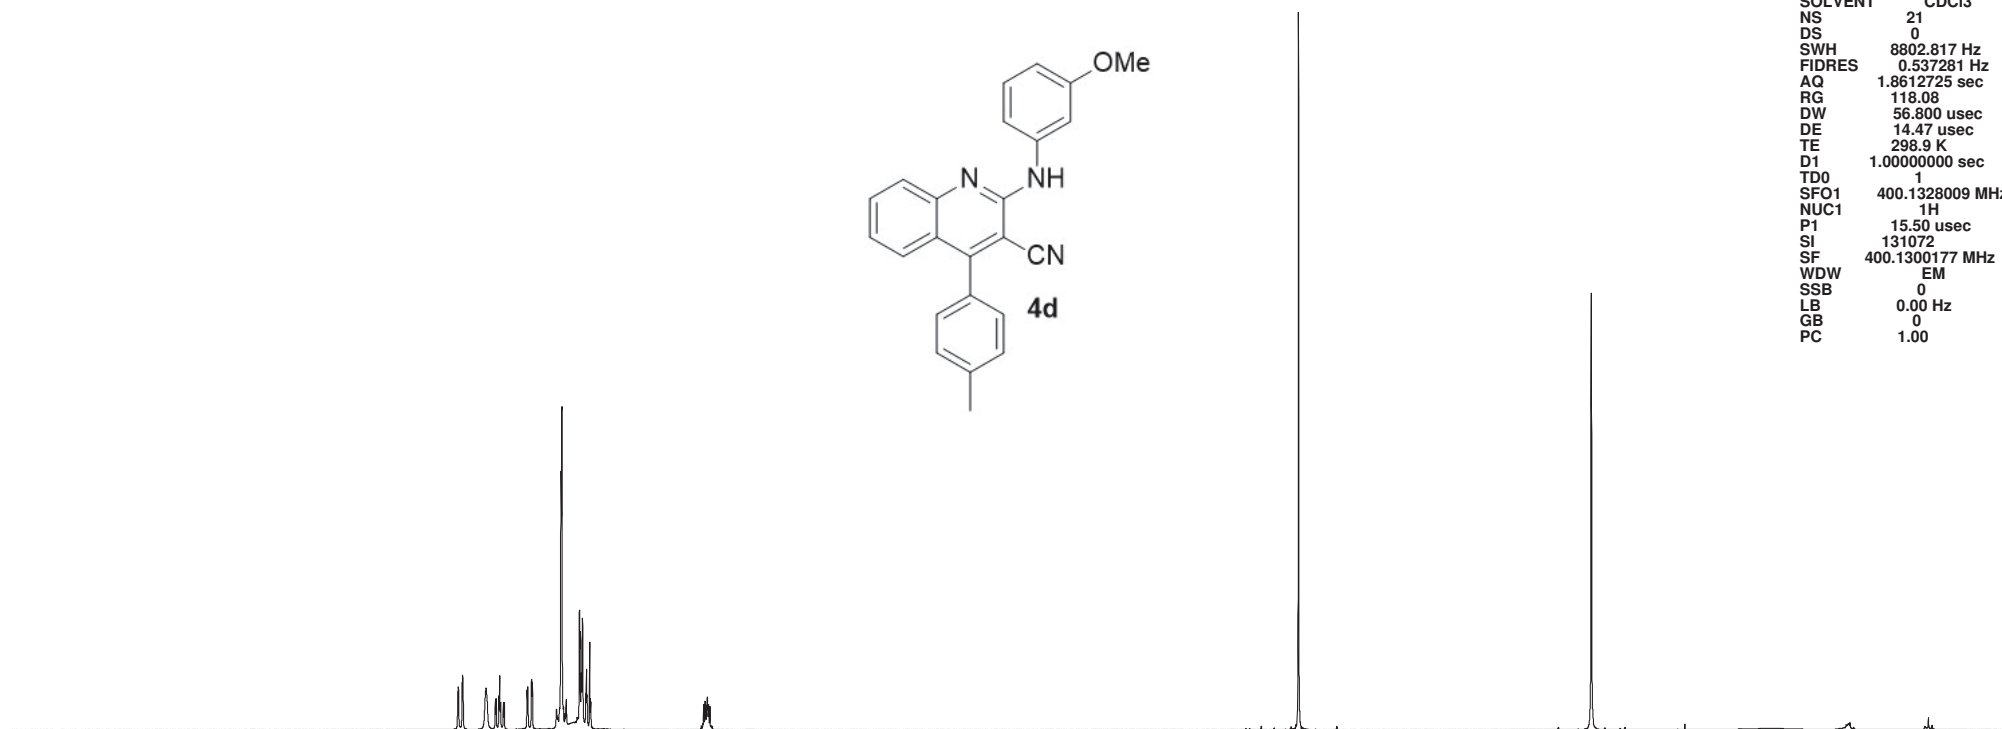

1.04  
1.00  
1.06  
1.05  
4.20  
2.33  
1.08  
1.00  
3.01  
3.06

3OMePD, 4'MeABP, MCN, 80deg, 5h, purified pale yellow solid

160.183  
157.083  
150.996  
148.295  
140.240  
139.895  
132.701  
131.536  
129.601  
129.505  
129.179  
127.602  
127.041  
124.358  
121.810  
116.134  
112.393  
109.217  
105.939  
96.591  
77.310  
76.992  
76.675  
55.299  
21.421

NAME mani 25-01-2019  
EXPNO 6  
PROCNO 1  
Date\_ 20190126  
Time\_ 1.10 h  
INSTRUM spect  
PROBHD Z108618\_0411 (  
PULPROG zgpg30  
TD 65536  
SOLVENT CDCl3  
NS 2999  
DS 4  
SWH 28409.092 Hz  
FIDRES 0.866977 Hz  
AQ 1.1534836 sec  
RG 212.49  
DW 17.600 usec  
DE 6.50 usec  
TE 299.1 K  
D1 2.0000000 sec  
D11 0.0300000 sec  
TD0 1  
SFO1 100.6258487 MHz  
NUC1 13C  
P1 10.50 usec  
Sf 32768  
SF 100.6127738 MHz  
WDW EM  
SSB 0  
LB 3.00 Hz  
GB 0  
PC 1.40

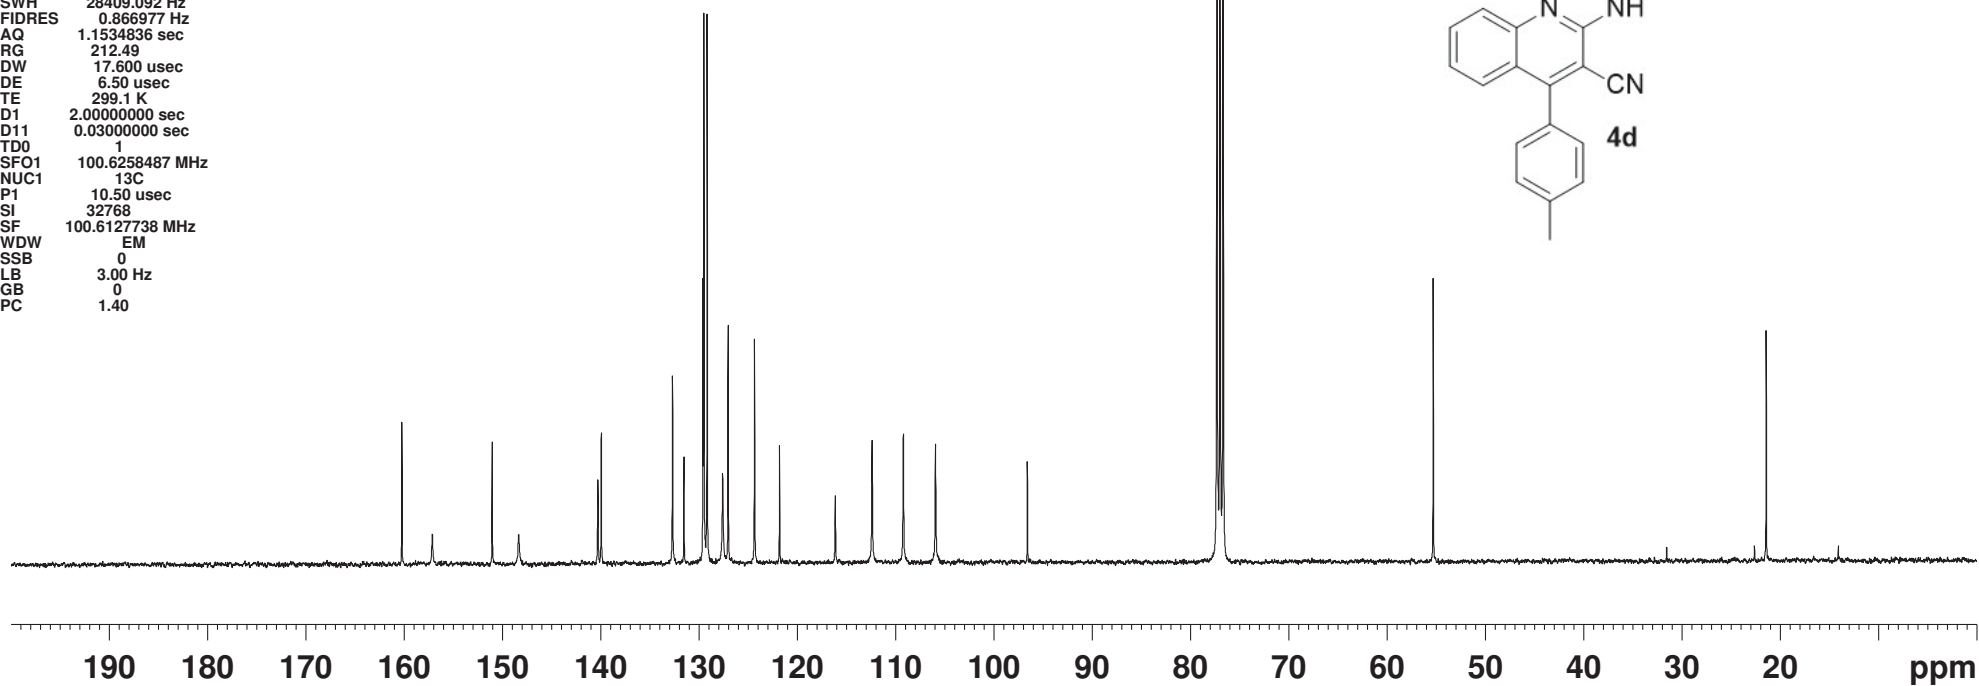

PD, MCN, 2-amino-4'-F-ABP, 80deg, 5h, purified topspot

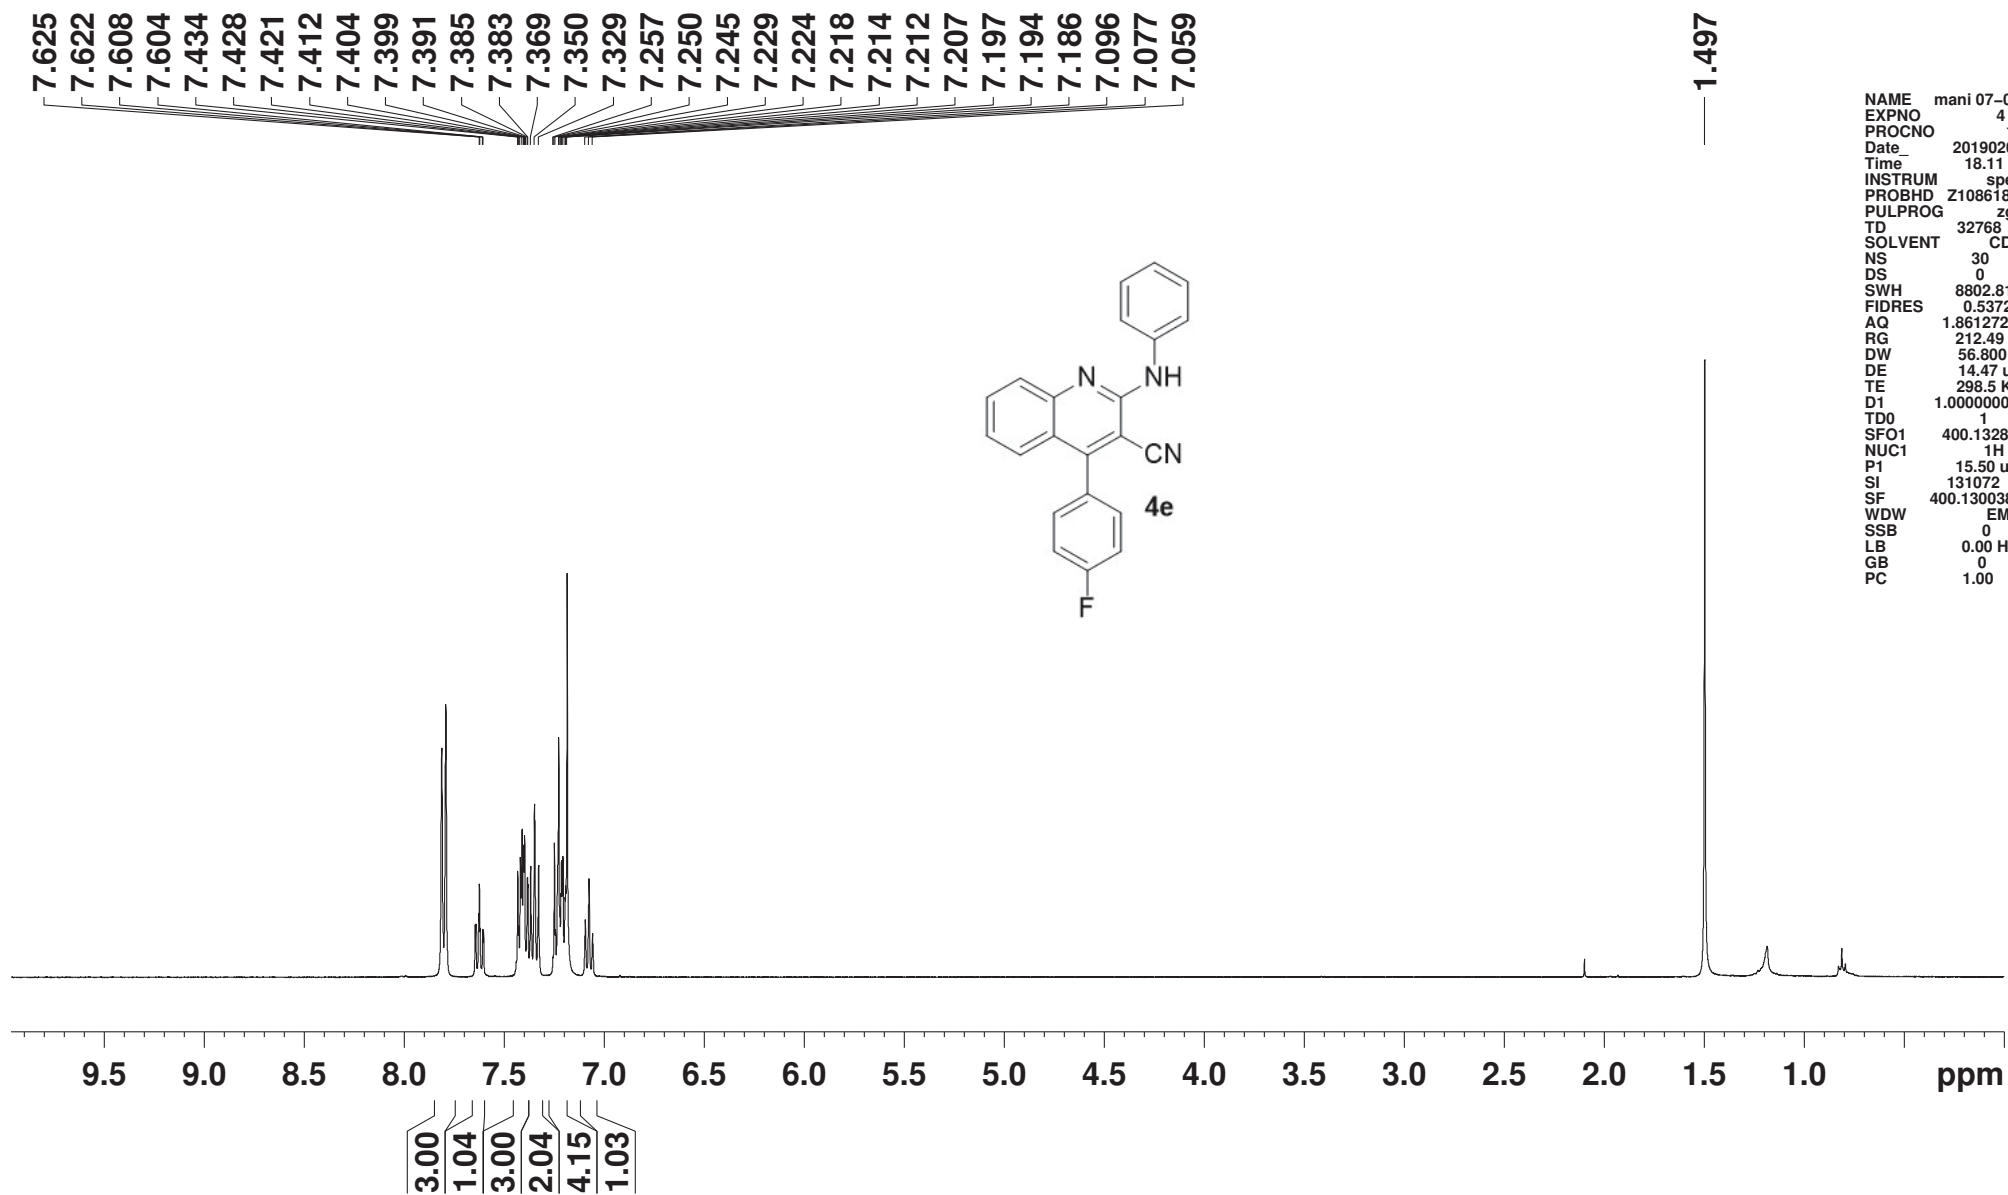

PD, MCN, 2-amino-4'-F-ABP, 80deg, 5h, purified topspot

164.795  
162.306  
155.650  
151.041  
148.653  
138.977  
132.869  
131.329  
131.245  
130.515  
129.004  
127.867  
126.663  
124.510  
123.632  
121.718  
120.222  
116.260  
116.040  
96.717

77.316  
76.998  
76.680

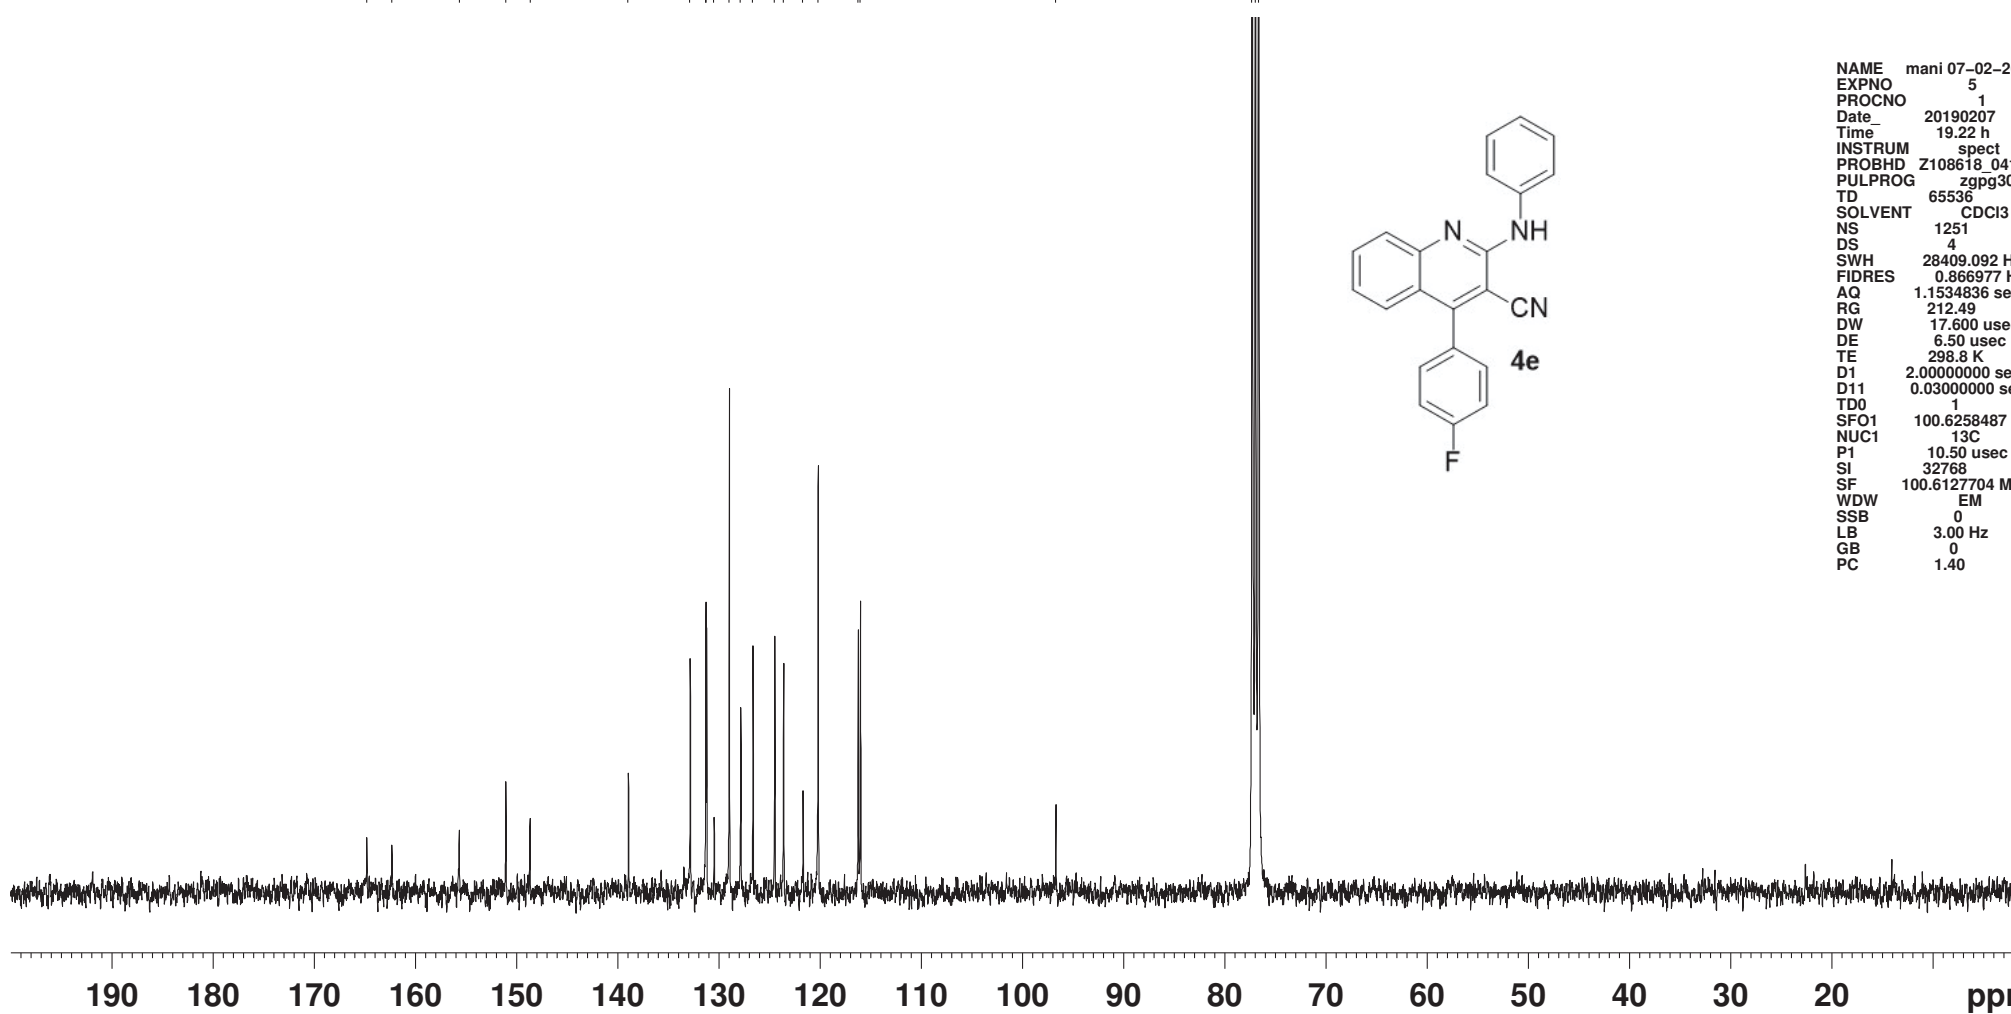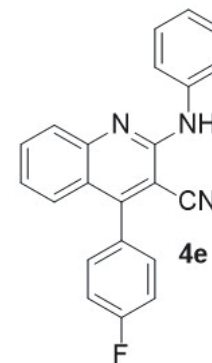

NAME mani 07-02-21  
EXPNO 5  
PROCNO 1  
Date\_ 20190207  
Time 19.22 h  
INSTRUM spect  
PROBHD Z108618\_041  
PULPROG zgpg30  
TD 65536  
SOLVENT CDCl3  
NS 1251  
DS 4  
SWH 28409.092 H  
FIDRES 0.866977 Hz  
AQ 1.1534836 sec  
RG 212.49  
DW 17.600 usec  
DE 6.50 usec  
TE 298.8 K  
D1 2.00000000 sec  
D11 0.03000000 sec  
TD0 1  
SFO1 100.6258487 MHz  
NUC1 13C  
P1 10.50 usec  
SI 32768  
SF 100.6127704 MHz  
WDW EM  
SSB 0  
LB 3.00 Hz  
GB 0  
PC 1.40

7.844  
7.823  
7.814  
7.790  
7.643  
7.622  
7.614  
7.589  
7.544  
7.509  
7.490  
7.422  
7.404  
7.385  
7.348  
7.329  
7.239  
7.168  
7.145

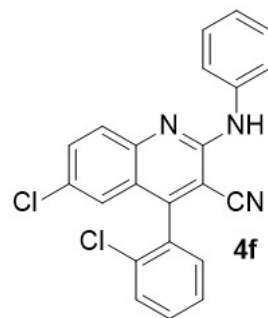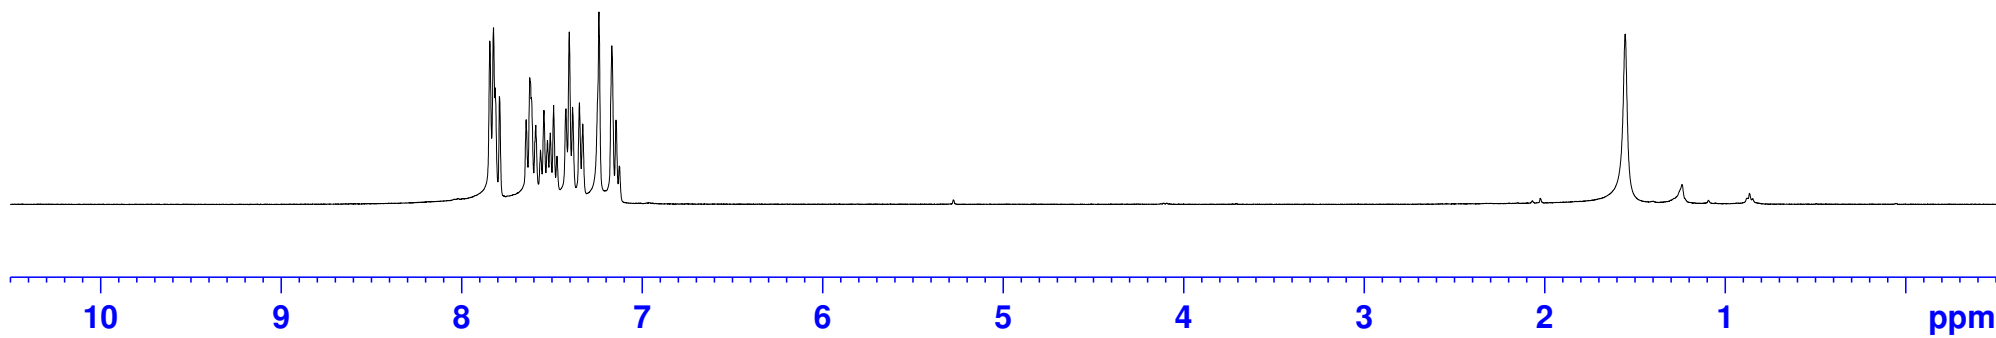

2.99  
1.99  
1.07  
1.09  
3.04  
0.94  
2.01

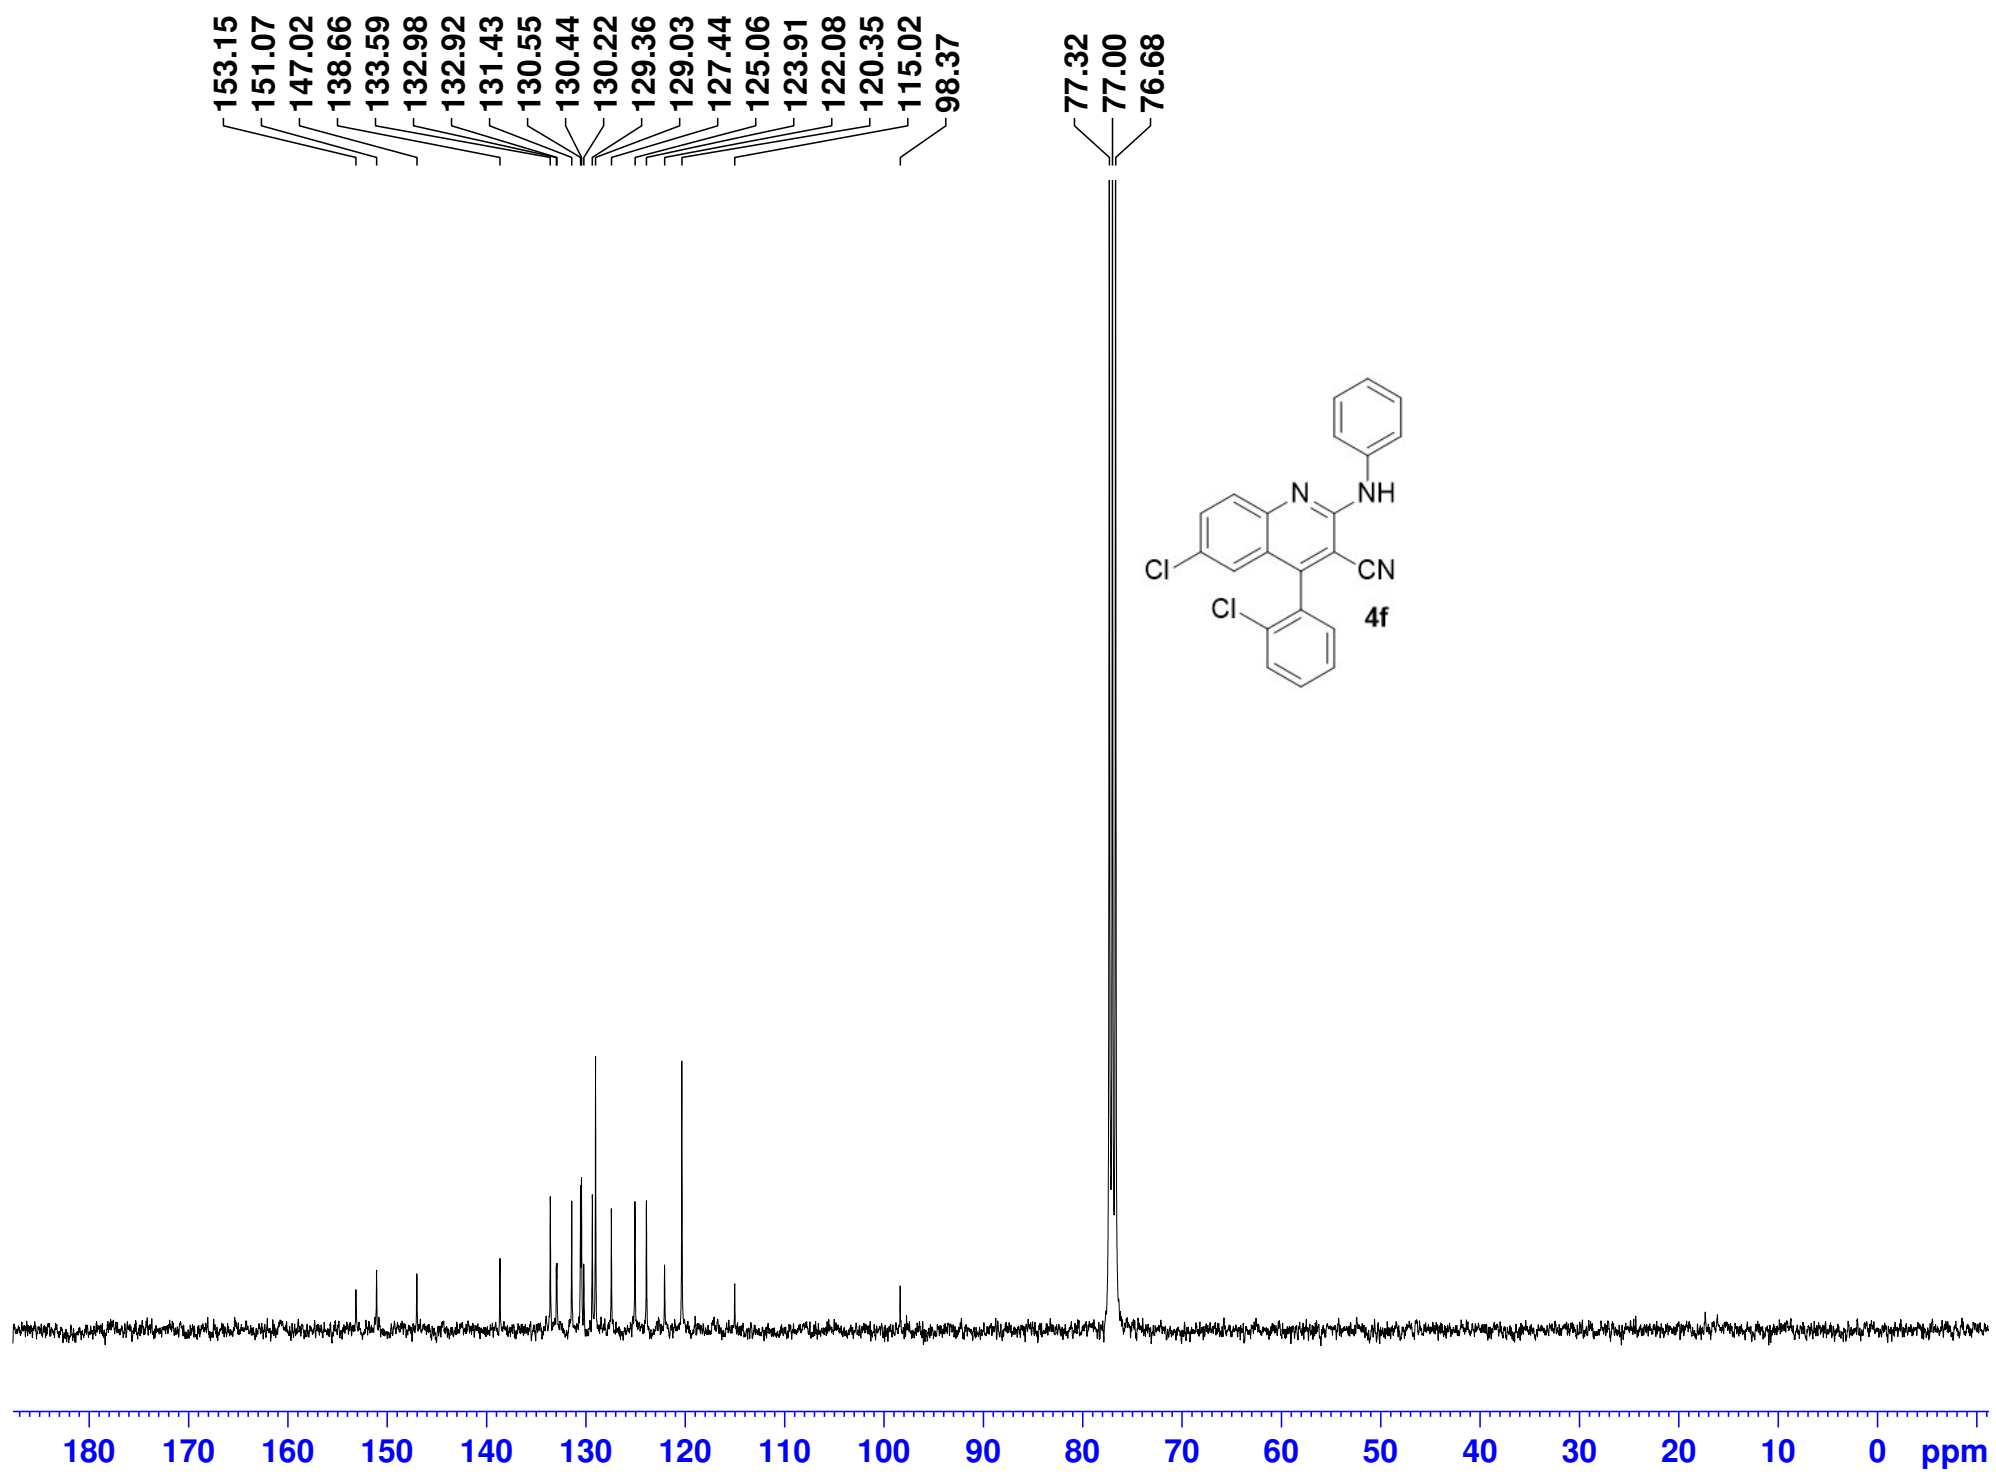

7.798  
7.778  
7.776  
7.680  
7.676  
7.662  
7.659  
7.655  
7.641  
7.638  
7.403  
7.399  
7.393  
7.380  
7.377  
7.369  
7.366  
7.363  
7.359  
7.352  
7.349  
7.345  
7.331  
7.328  
7.240  
7.135  
7.128  
7.125  
7.122  
7.107  
7.091  
7.088  
7.085

— 2.831

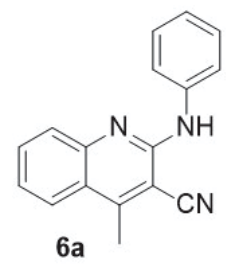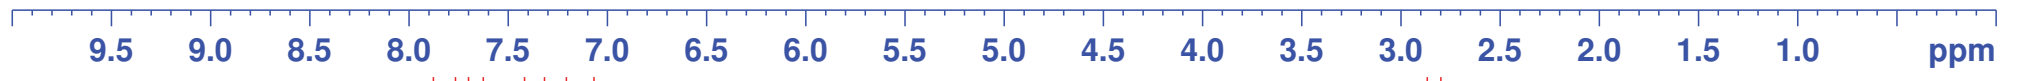

4.01  
1.04  
3.02  
1.93

3.00

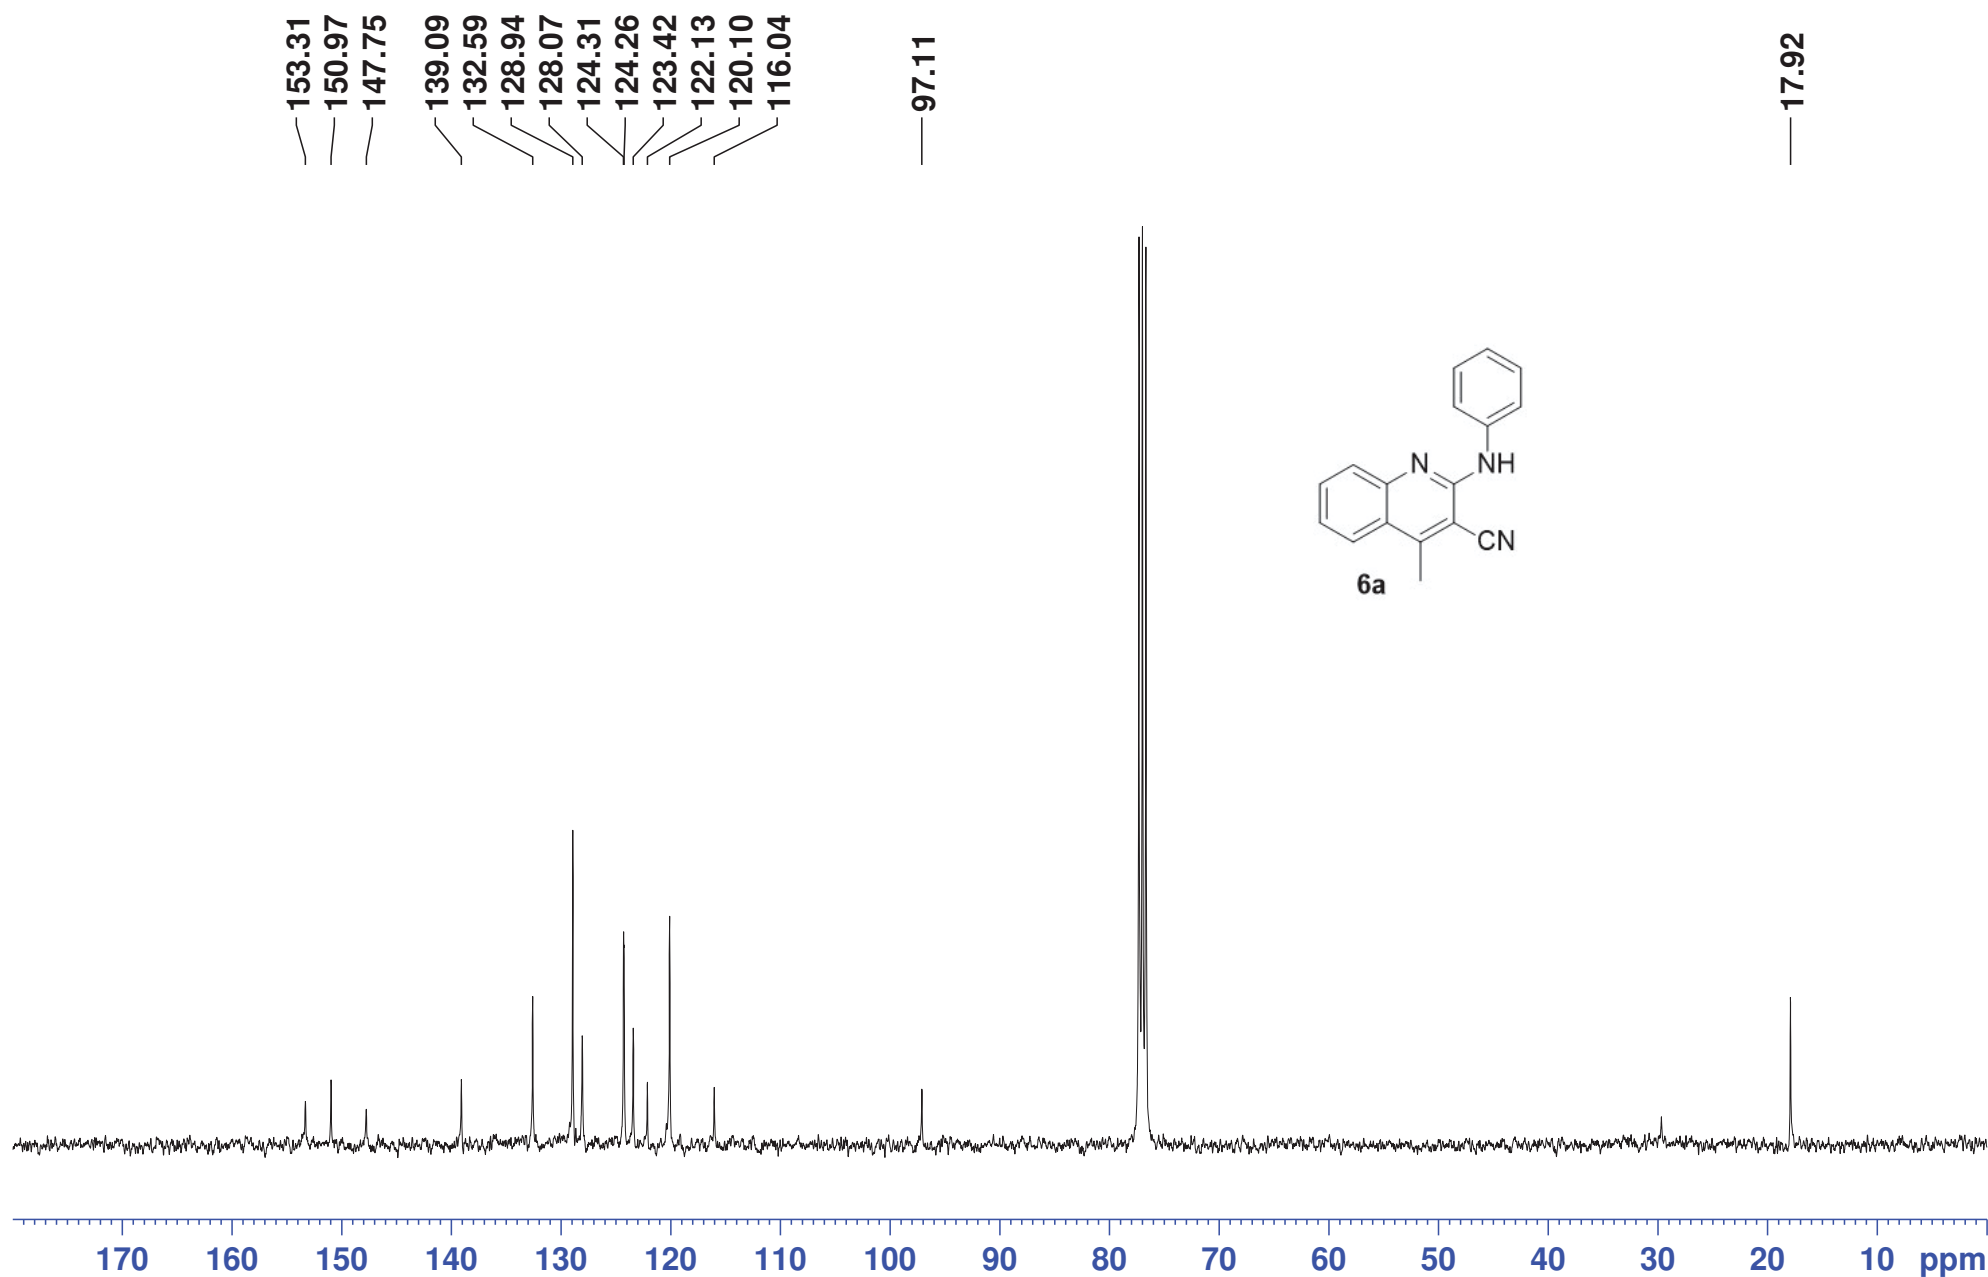



7.870  
7.849  
7.820  
7.799  
7.734  
7.713  
7.706  
7.685  
7.667  
7.397  
7.377  
7.359  
7.281  
7.231  
7.210  
7.105

— 2.886  
— 2.386

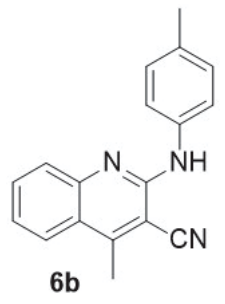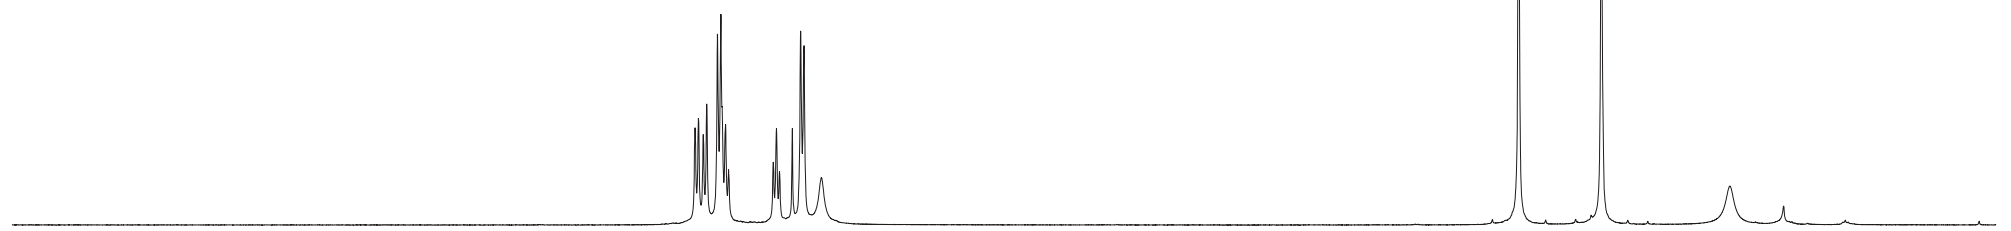

11 10 9 8 7 6 5 4 3 2 1 ppm

1.00  
0.99  
2.93  
1.01  
1.97  
0.97

3.00  
3.06

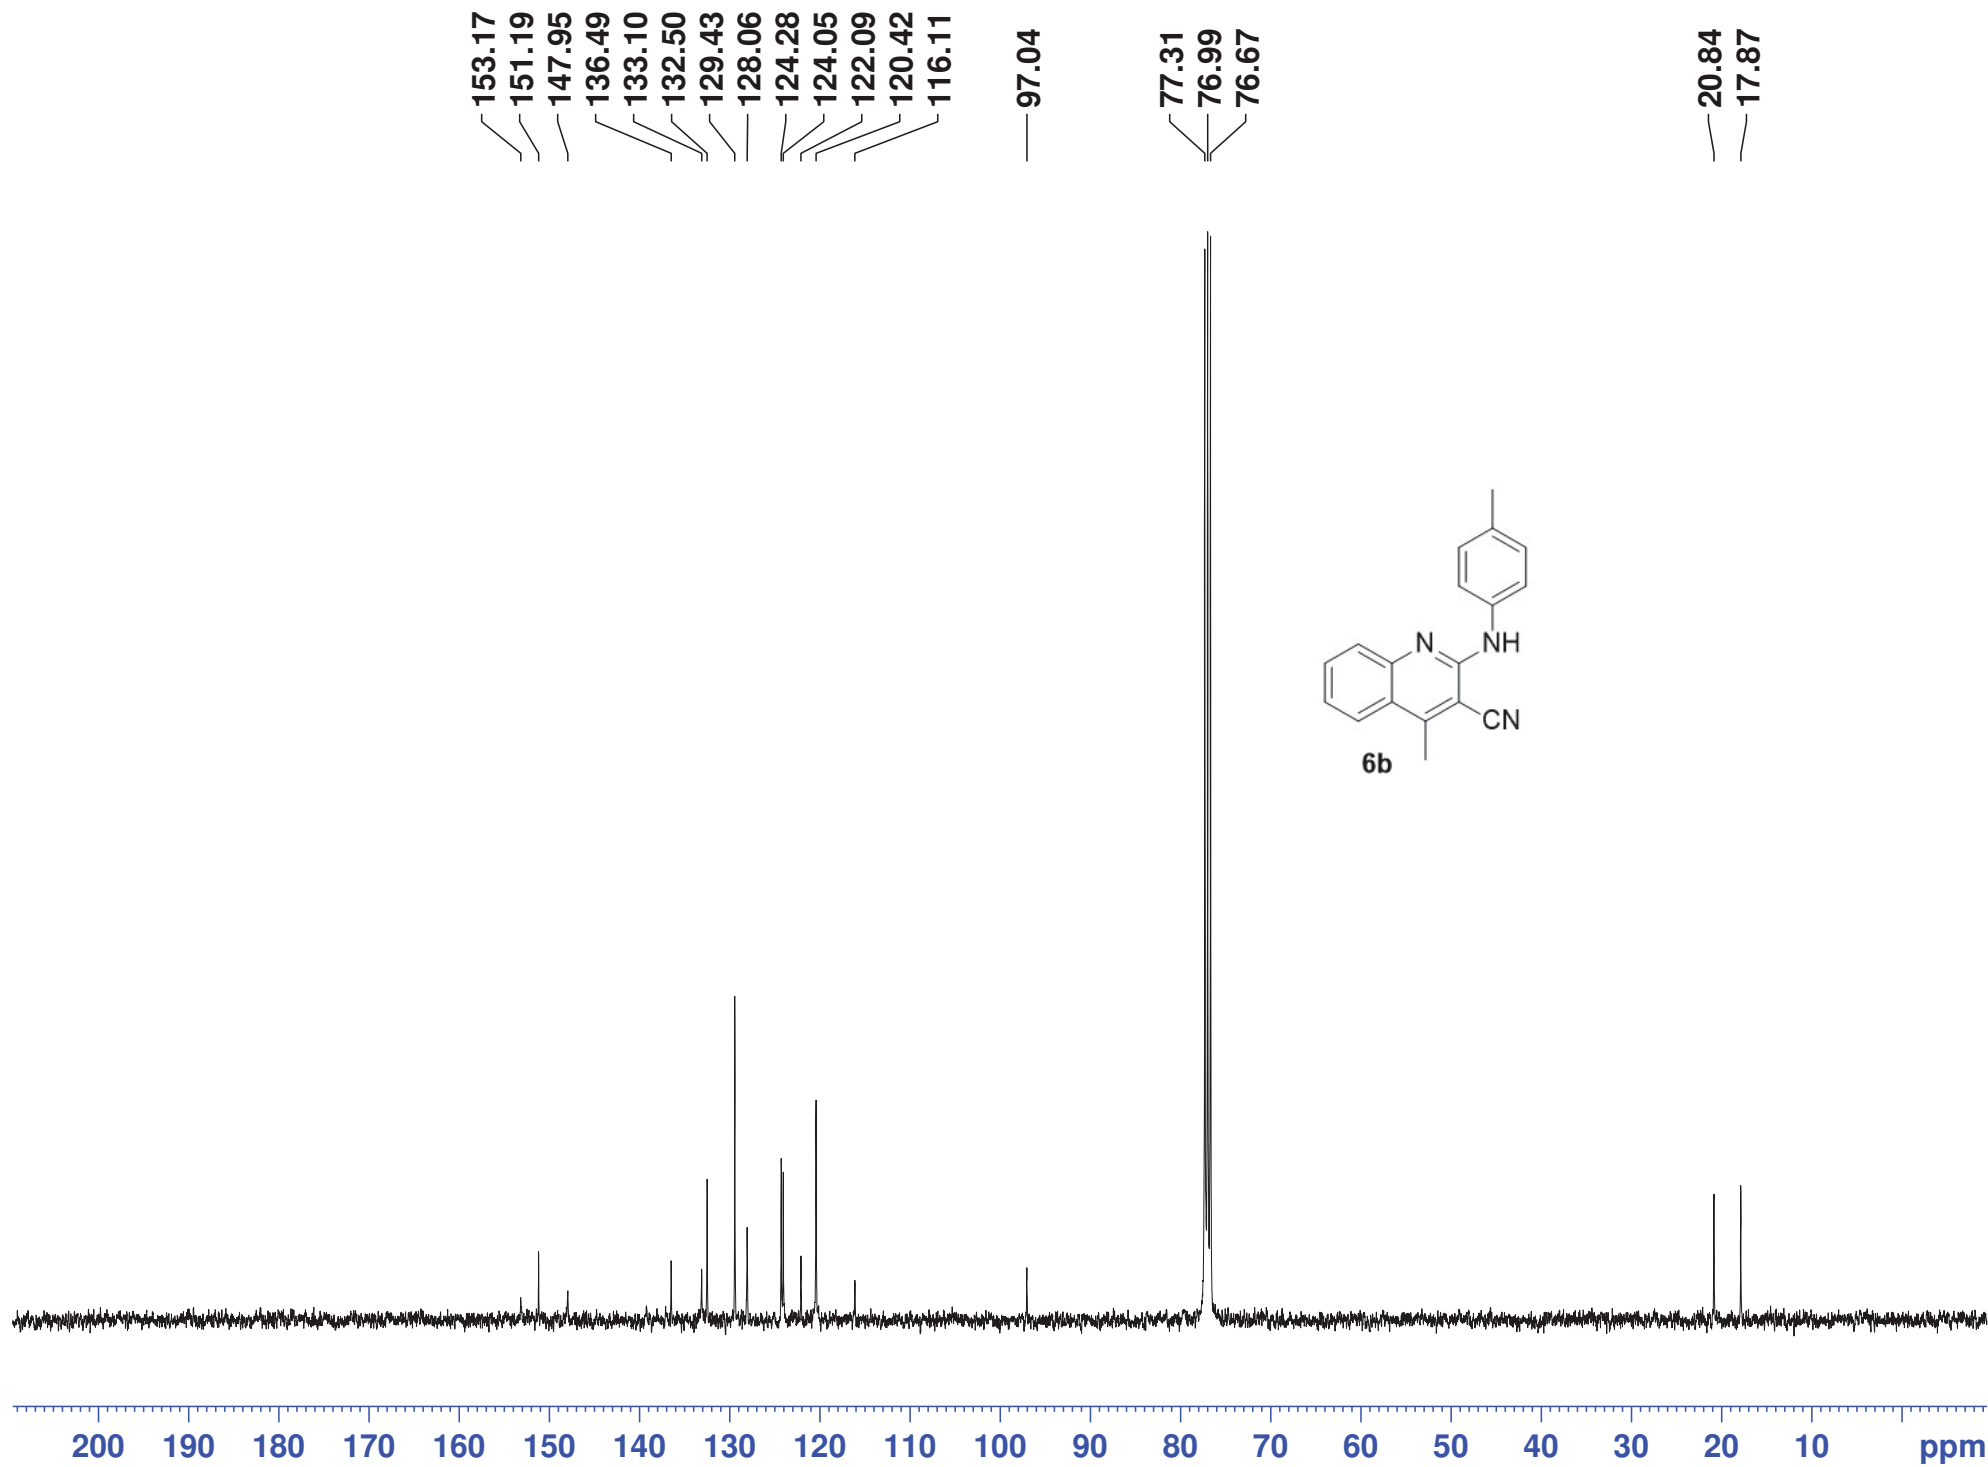

7.821  
7.800  
7.607  
7.586  
7.572  
7.556  
7.538  
7.535  
7.303  
7.287  
7.270  
7.266  
7.240  
6.974  
6.584

2.868  
2.339  
2.233

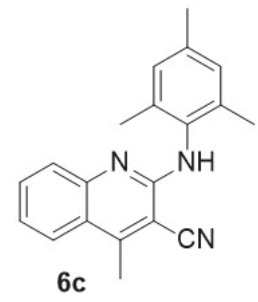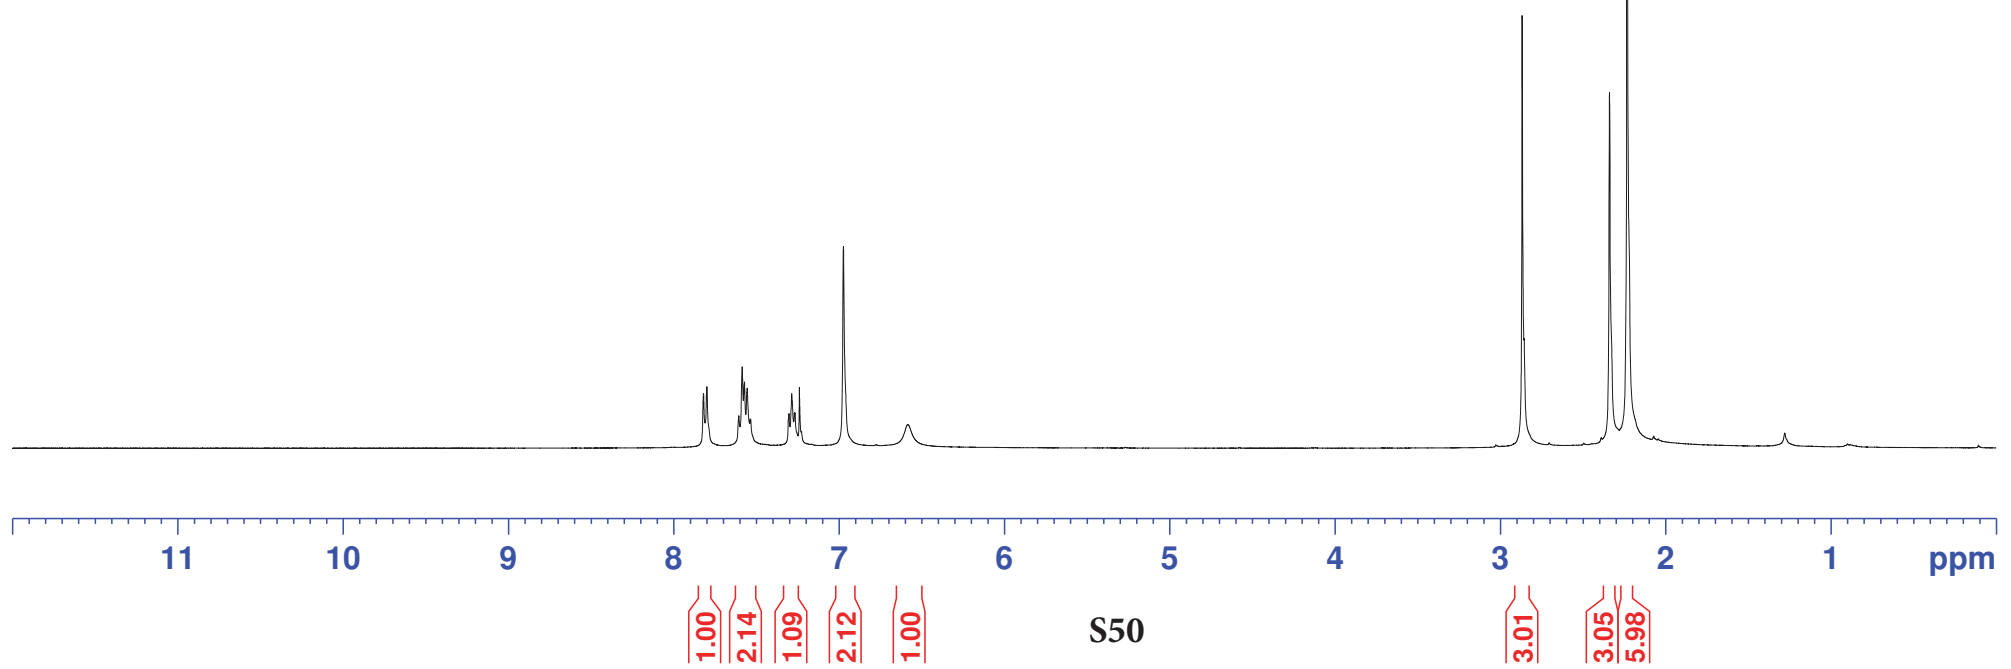

153.15  
152.60  
148.50  
136.49  
135.80  
132.76  
132.20  
128.91  
127.91  
124.22  
123.43  
121.83  
116.26

96.07

77.31  
76.99  
76.68

20.95  
18.53  
17.70

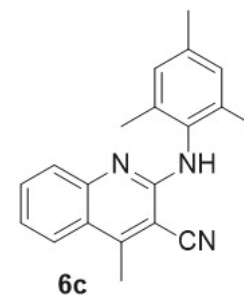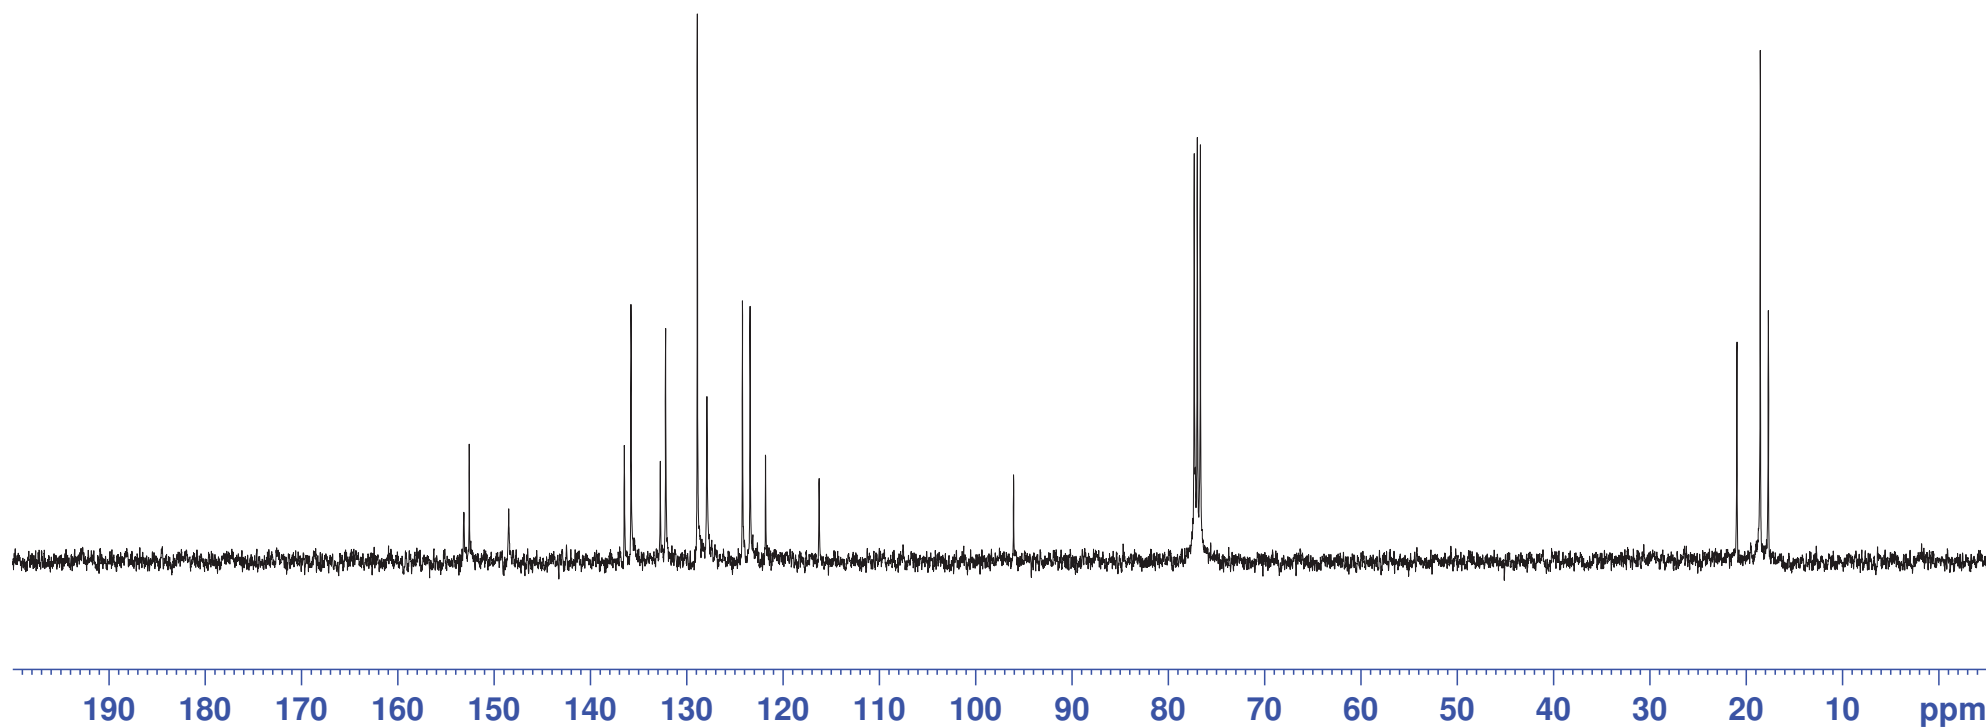

8.393  
8.373  
7.868  
7.865  
7.847  
7.844  
7.805  
7.803  
7.784  
7.782  
7.704  
7.701  
7.687  
7.683  
7.680  
7.666  
7.663  
7.403  
7.400  
7.386  
7.383  
7.379  
7.365  
7.362  
7.354  
7.351  
7.332  
7.315  
7.312  
7.285  
7.270  
7.144  
7.141  
7.125  
7.122  
7.106  
7.104  
— 2.887  
— 2.403

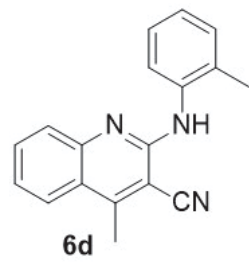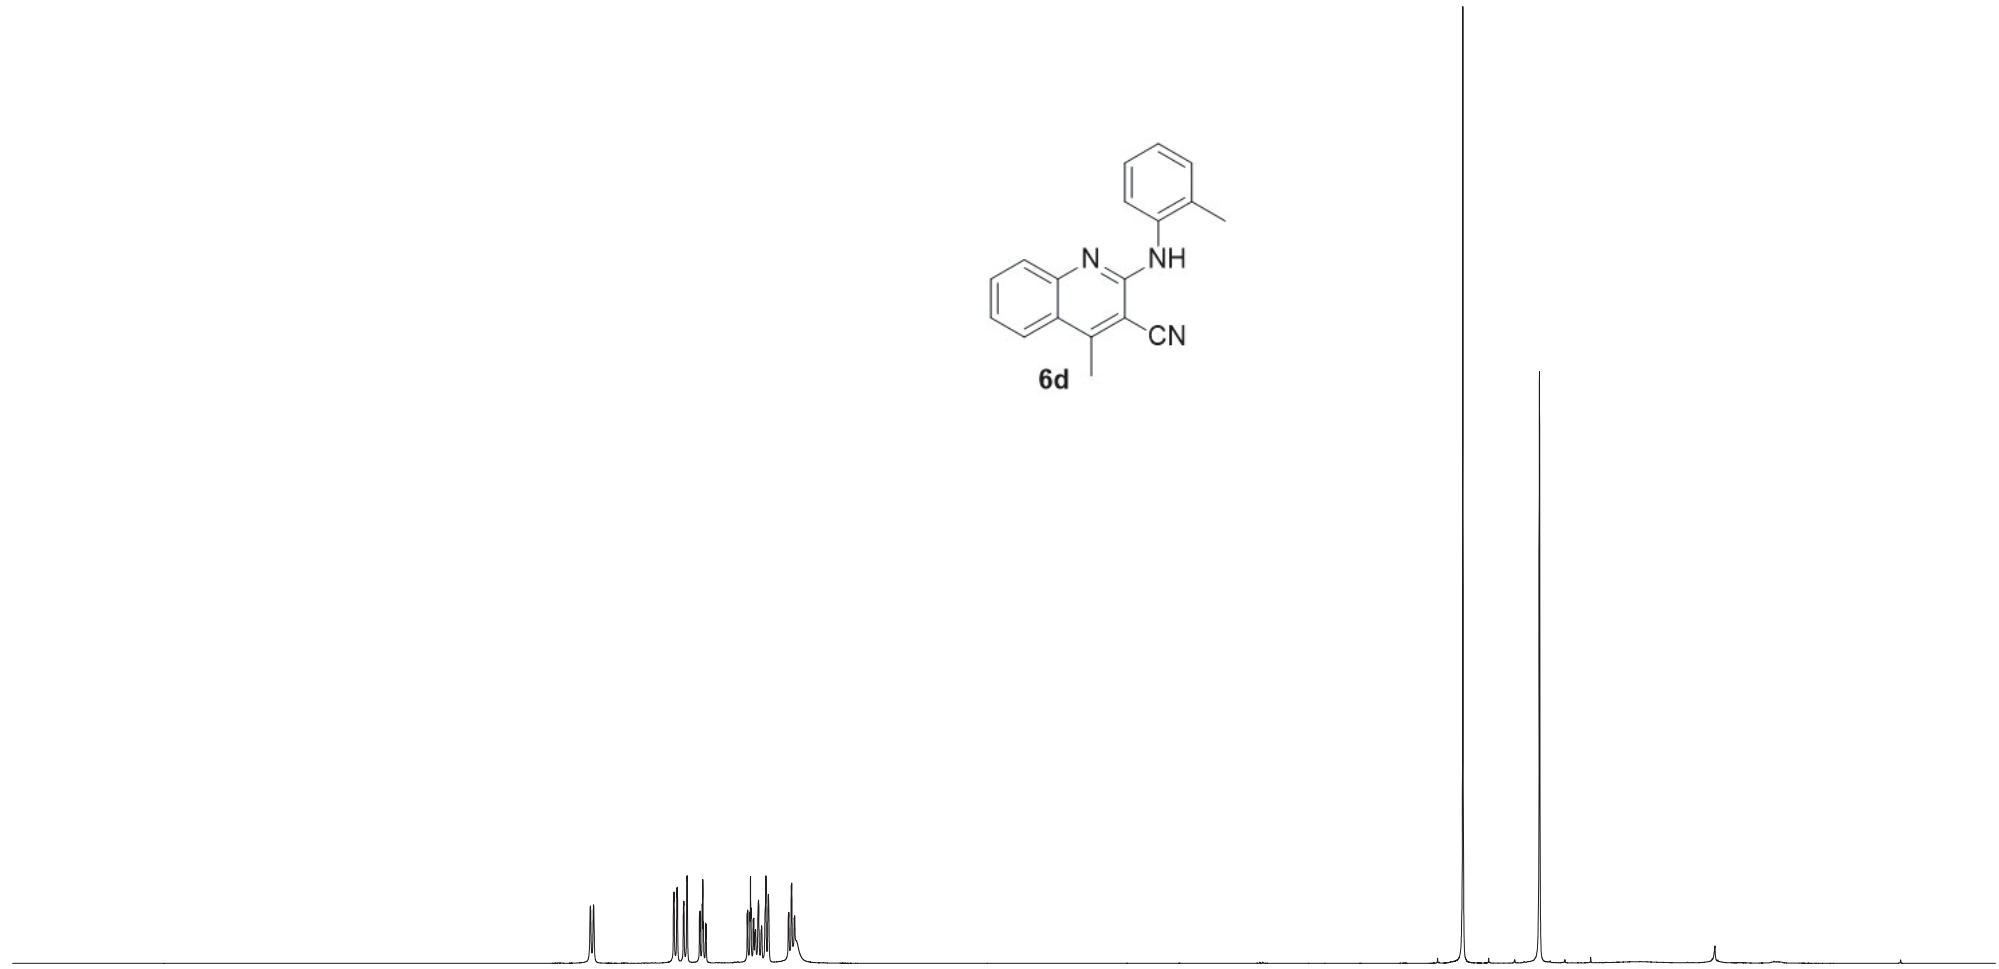

11 10 9 8 7 6 5 4 3 2 1 ppm

0.96  
1.03  
0.98  
1.01  
2.06  
1.10  
1.88

S52

3.03  
3.00

153.21  
151.25  
147.76  
137.20  
132.49  
130.50  
128.73  
127.98  
126.64  
124.26  
124.08  
124.02  
122.01  
121.77  
116.07  
97.14

77.31  
76.99  
76.67

17.94  
17.87

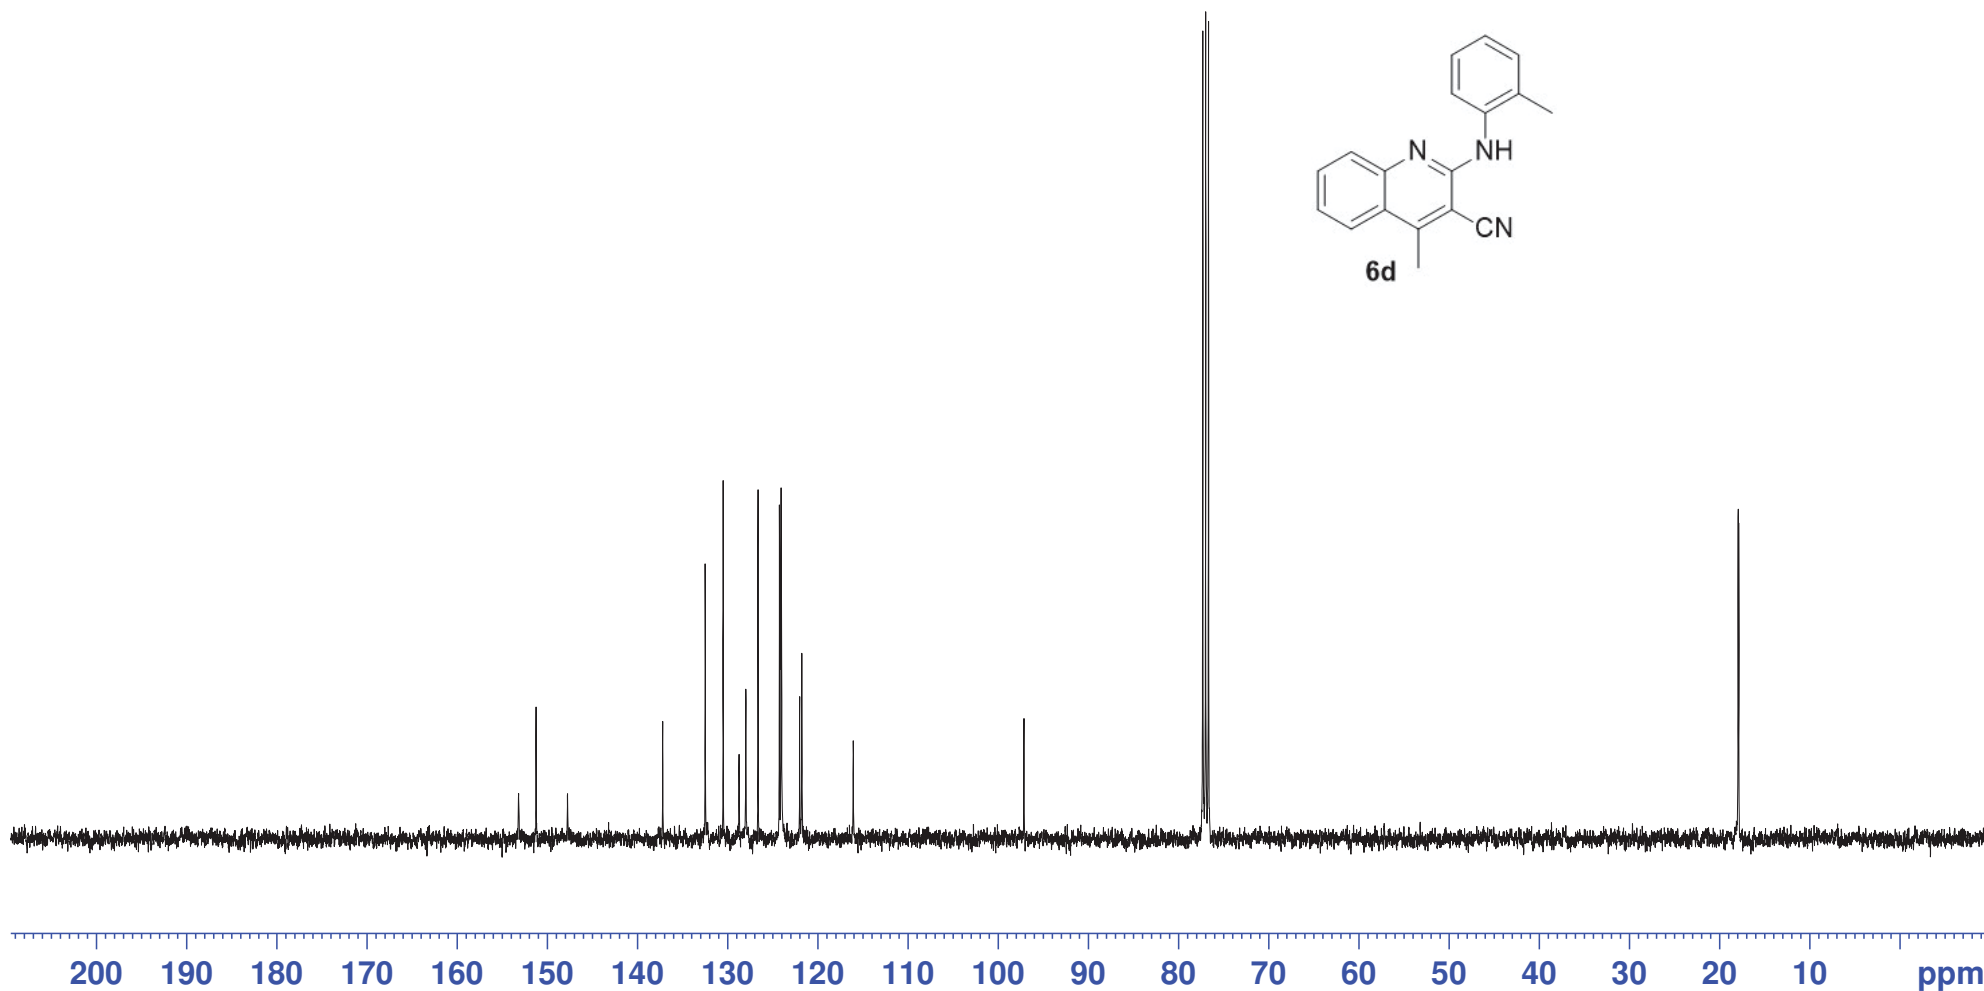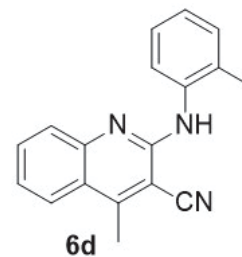

7.973  
7.968  
7.794  
7.774  
7.764  
7.741  
7.735  
7.730  
7.713  
7.708  
7.675  
7.653  
7.401  
7.397  
7.383  
7.362  
7.346  
7.240  
7.145  
7.126

2.833

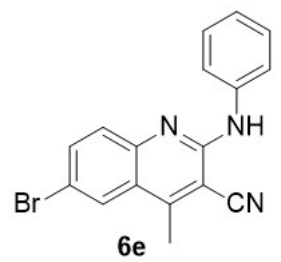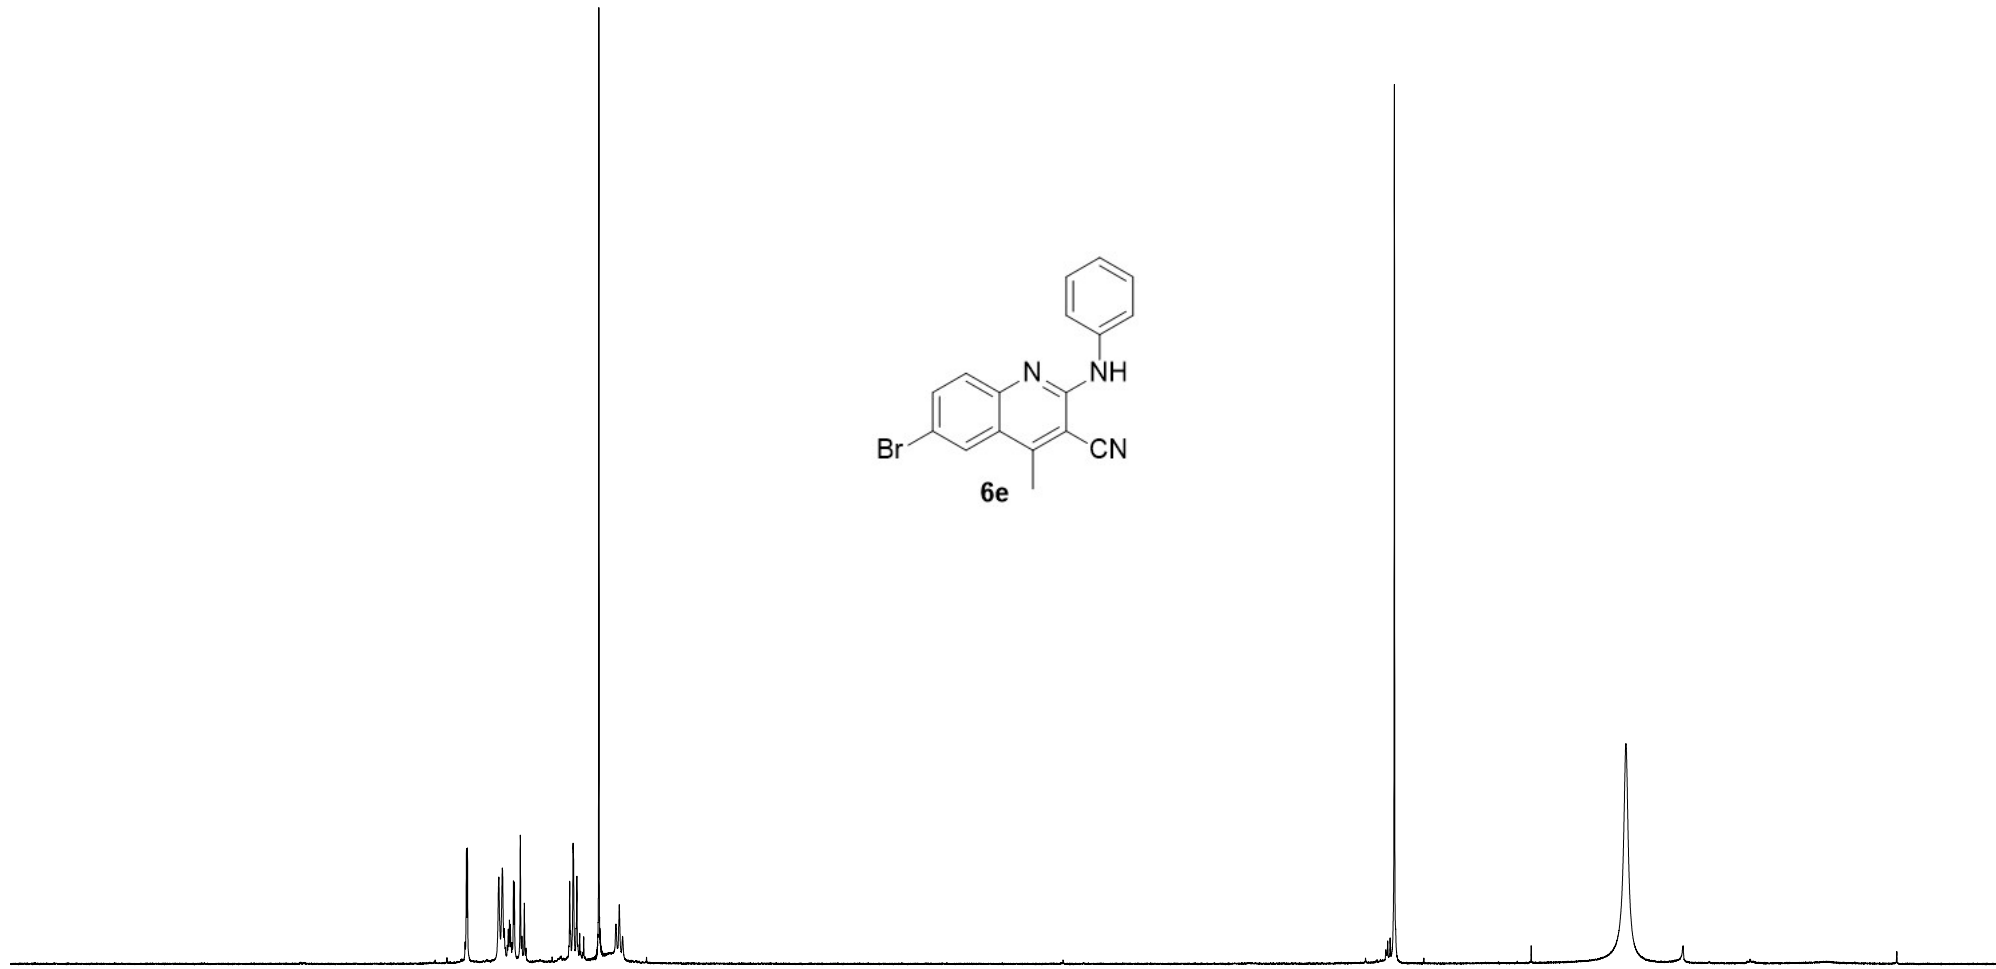

10 9 8 7 6 5 4 3 2 1 ppm

1.04  
2.02  
2.00  
2.04  
2.00

3.00

S54

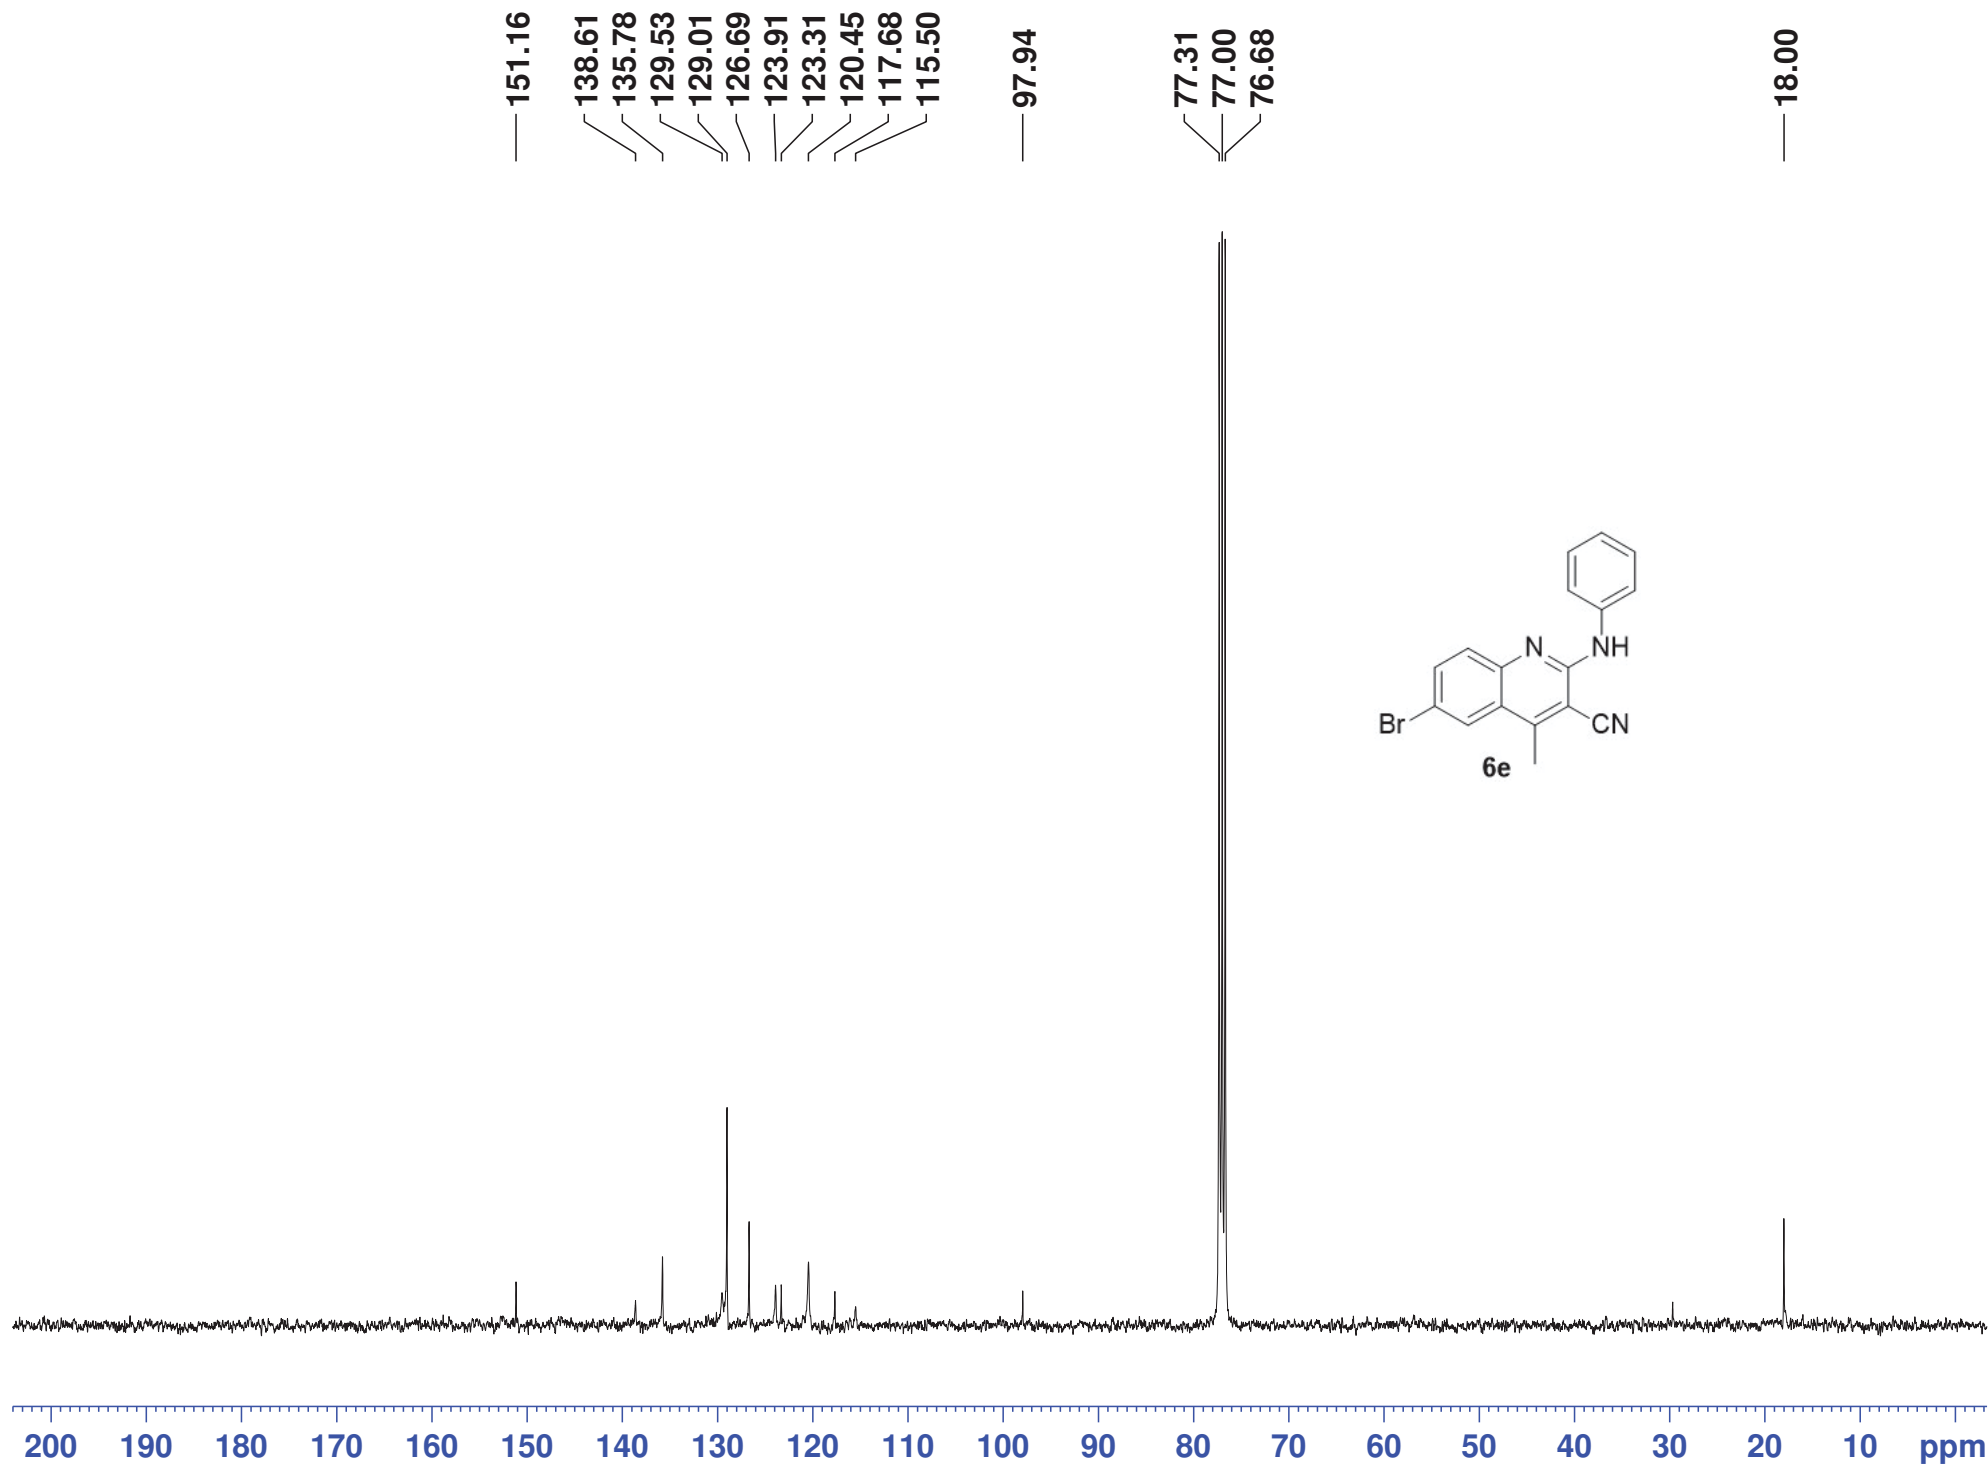



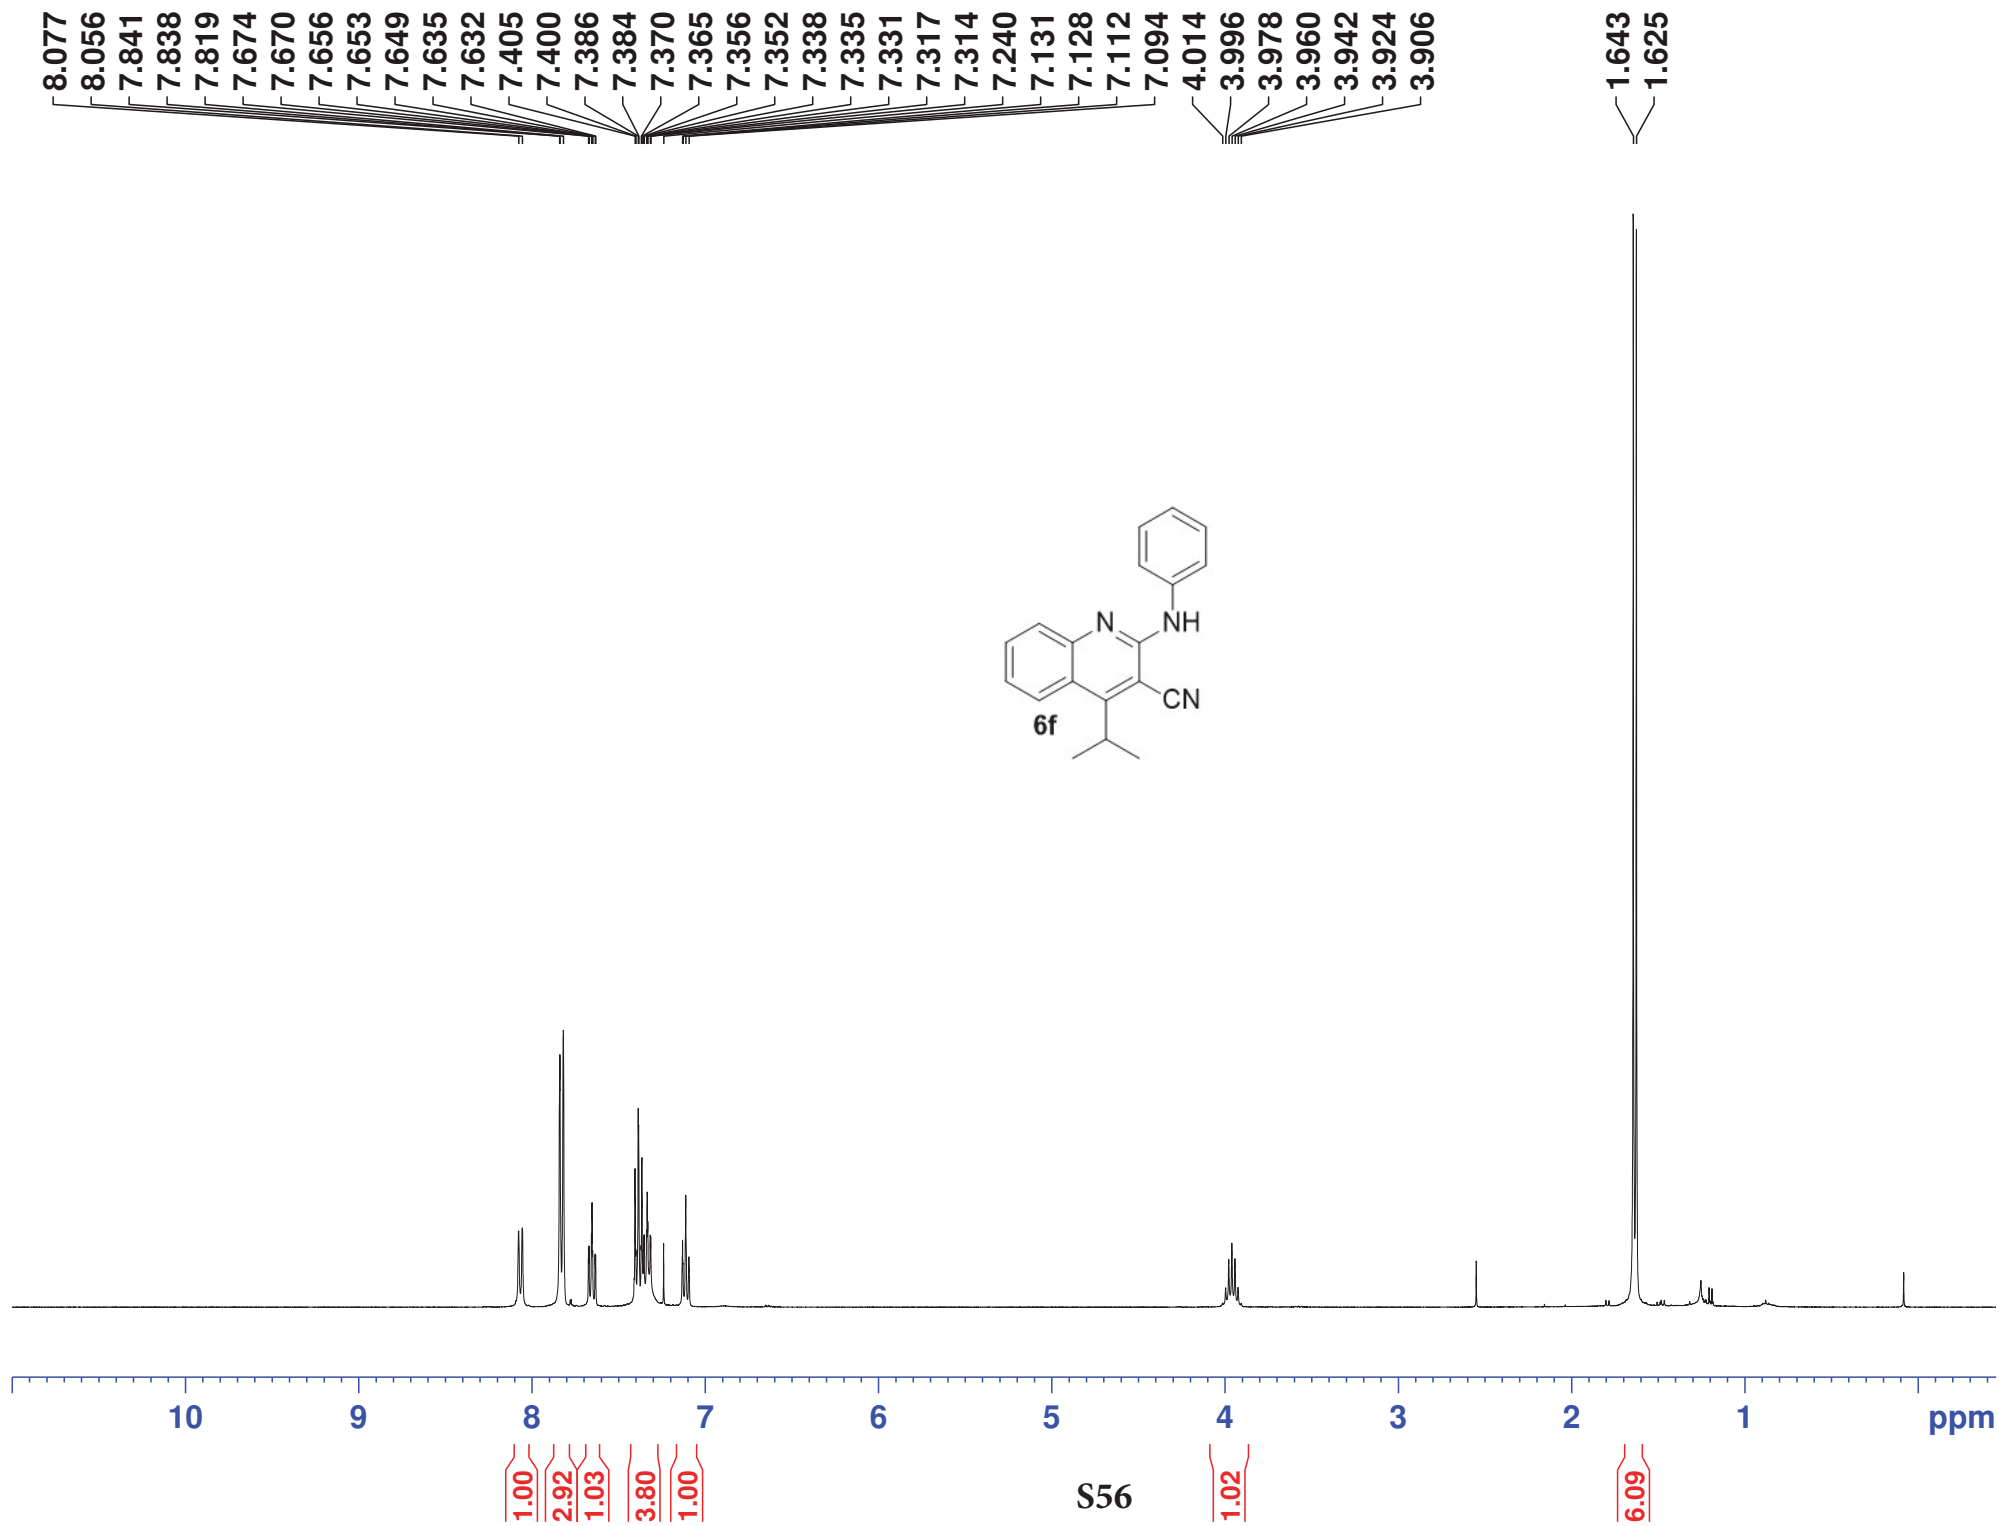

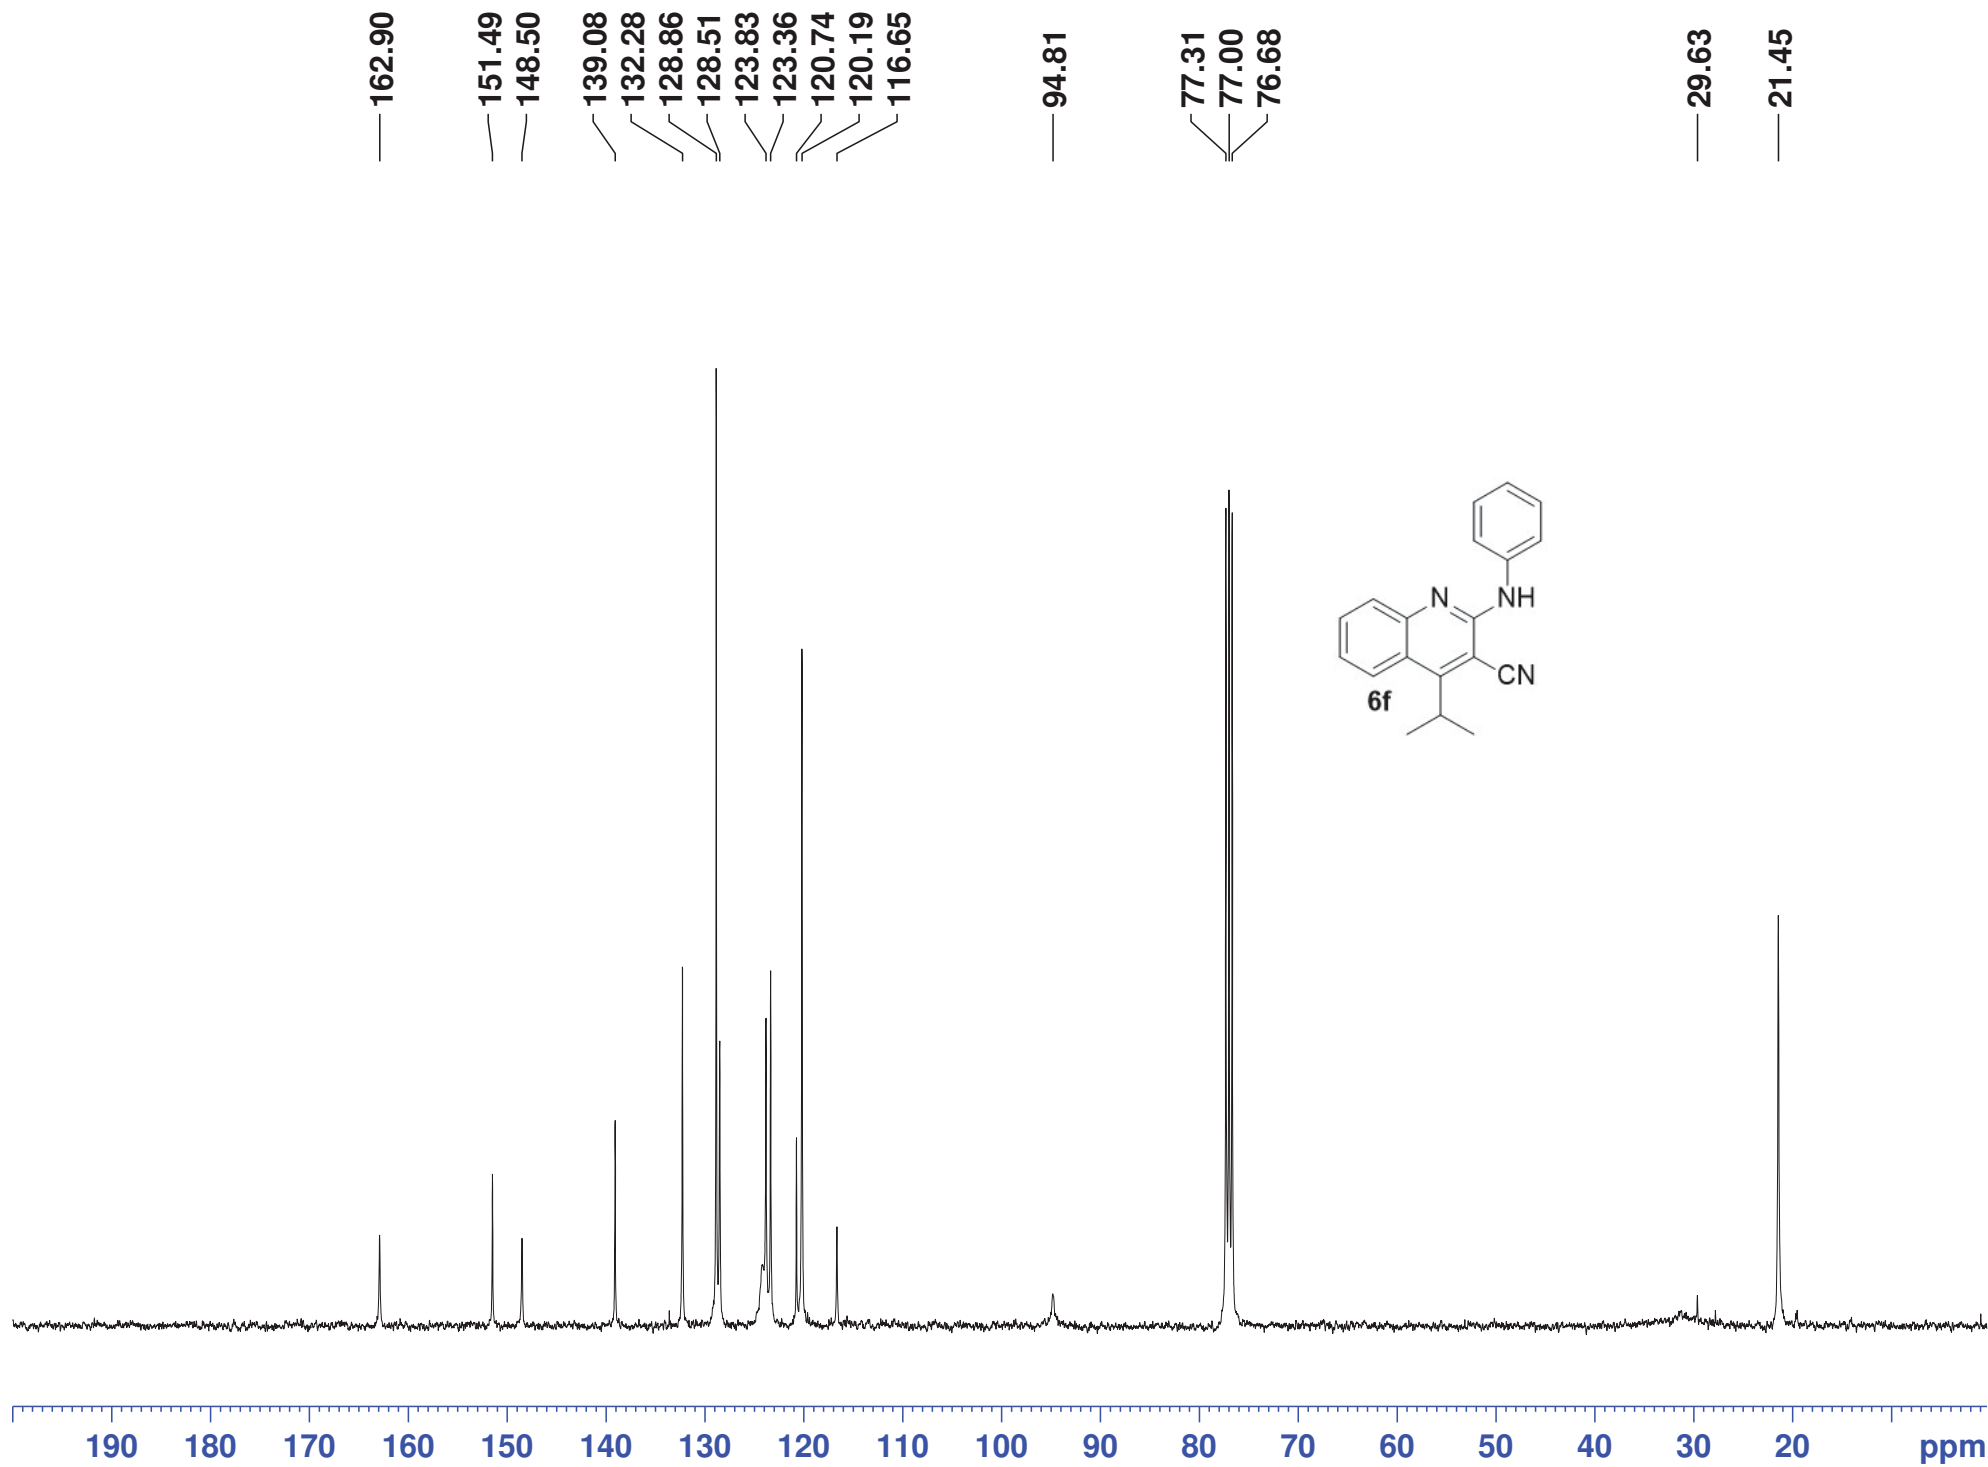

7.710  
7.688  
7.684  
7.671  
7.667  
7.581  
7.576  
7.573  
7.571  
7.565  
7.559  
7.555  
7.494  
7.492  
7.490  
7.489  
7.473  
7.471  
7.469  
7.468  
7.459  
7.457  
7.454  
7.451  
7.448  
7.445  
7.439  
7.437  
7.433  
7.263  
7.259  
7.246  
7.240  
7.238  
7.225  
7.221  
5.673

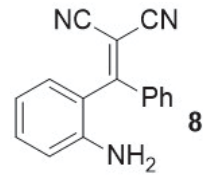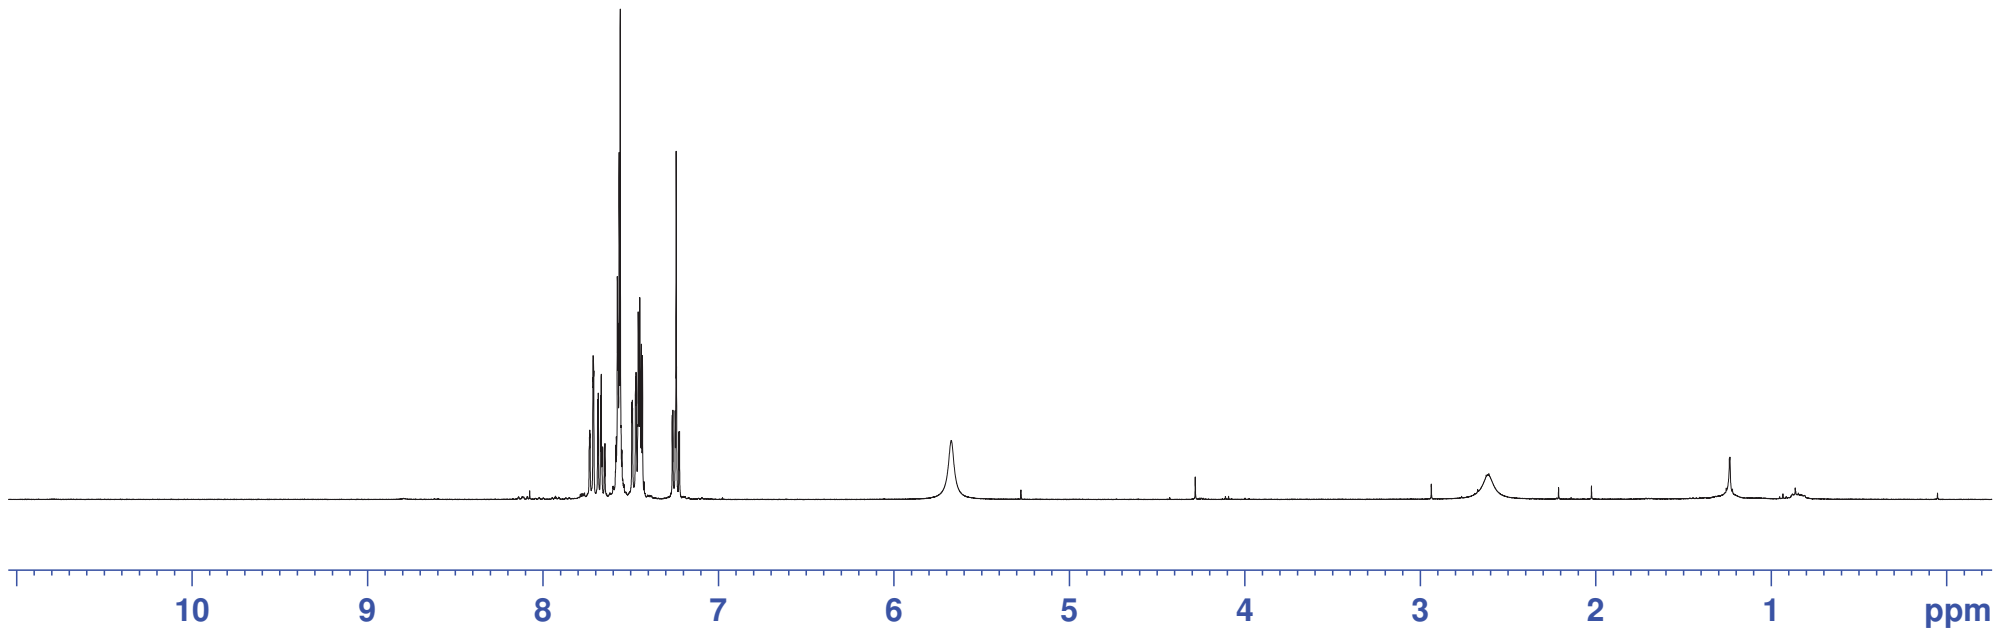

1.00  
1.04  
2.99  
1.08  
1.91  
1.44

1.96

S58

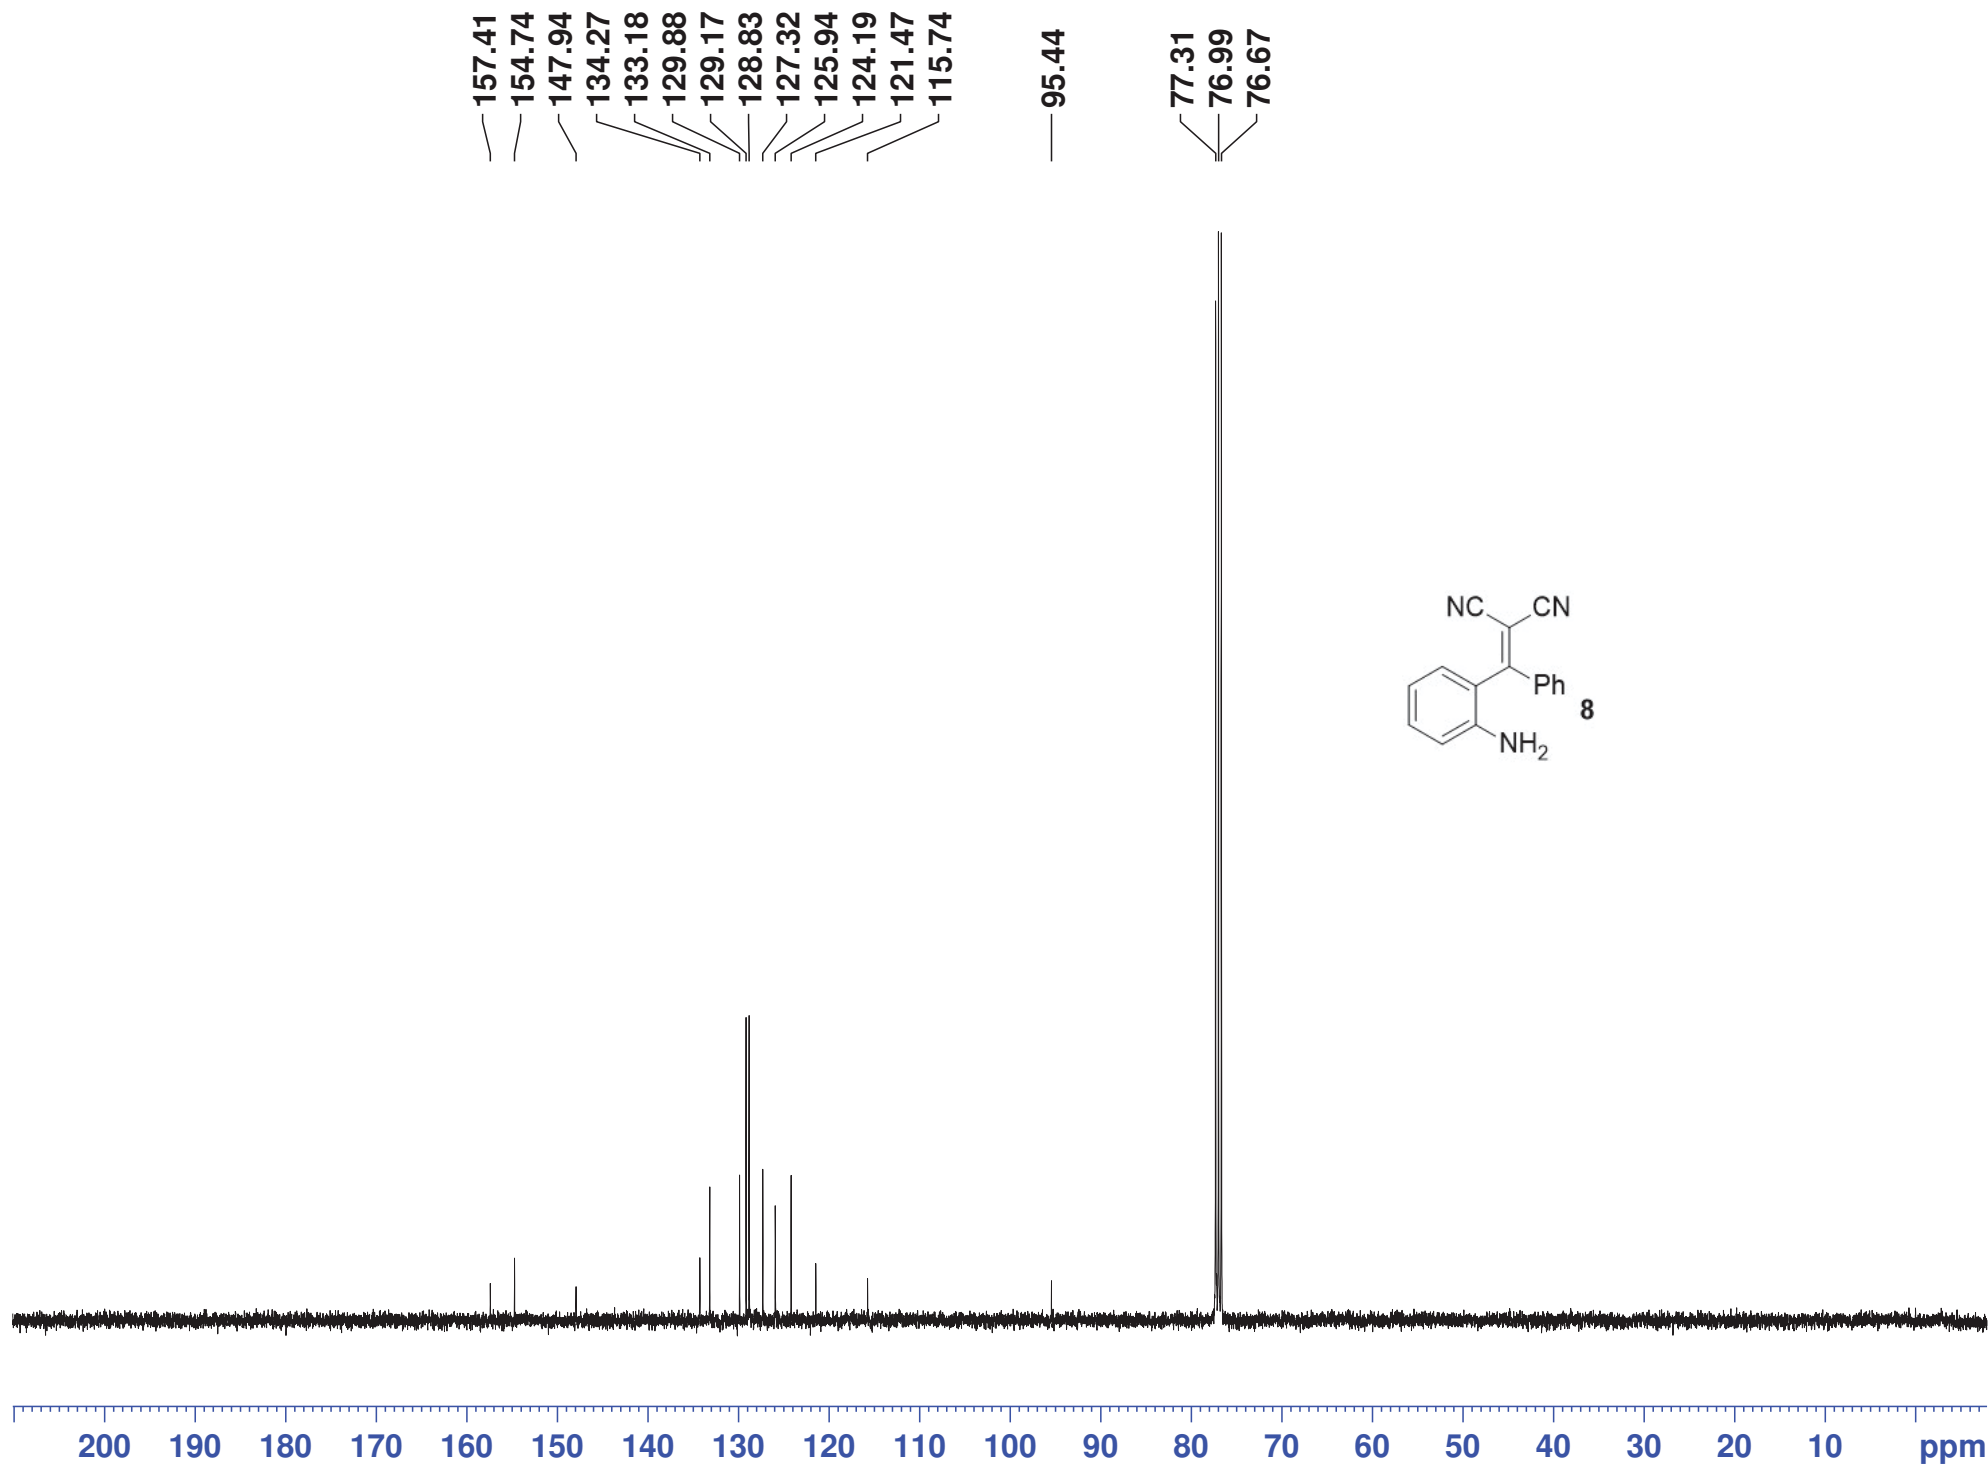

Supplement: c9ob02427a1.pdf [file c9ob02427a1.pdf]
